# Supplementary material for: Operational feasibility of Plasmodium vivax radical cure with tafenoquine or primaquine following point-of-care, quantitative glucose-6-phosphate dehydrogenase testing in the Brazilian Amazon: a real-life retrospective analysis
Source: PubMed Central journal article supplement (PMC10882209; doi:10.1016/s2214-109x(23)00542-9), 2024-02-14
Supplement: mmc2.pdf [file mmc2.pdf]

# THE LANCET

## Global Health

### Supplementary appendix 2

This appendix formed part of the original submission and has been peer reviewed. We post it as supplied by the authors.

Supplement to: Brito M, Rufatto R, Murta F, et al. Operational feasibility of *Plasmodium vivax* radical cure with tafenoquine or primaquine following point-of-care, quantitative glucose-6-phosphate dehydrogenase testing in the Brazilian Amazon: a real-life retrospective analysis. *Lancet Glob Health* 2024; **12**: e467–77.

## Supplementary materials

### Operational feasibility of *Plasmodium vivax* radical cure with tafenoquine or primaquine following point-of-care quantitative G6PD testing in the Brazilian Amazon – a real-life retrospective analysis

Marcelo Brito, et al.

|                                                                                                                                                                                                                                        |    |
|----------------------------------------------------------------------------------------------------------------------------------------------------------------------------------------------------------------------------------------|----|
| Table S1 Additional socio-demographic and baseline characteristics (primary population).....                                                                                                                                           | 2  |
| Table S2 Baseline socio-demographic and clinical characteristics of patients, by health facility level (primary population).....                                                                                                       | 3  |
| Table S3 Baseline socio-demographic and clinical characteristics of patients, by sex (primary population).....                                                                                                                         | 4  |
| Table S4 Malaria history by facility level (primary population).....                                                                                                                                                                   | 5  |
| Table S5 Malaria history by treatment group overall and by municipality (primary population). ....                                                                                                                                     | 6  |
| Table S6 Quantitative G6PD test results by treatment, overall and by municipality (primary population).....                                                                                                                            | 8  |
| Table S7 Quantitative G6PD testing by age group. ....                                                                                                                                                                                  | 9  |
| Figure S1 Proportion of patients who were G6PD-deficient, G6PD-intermediate, or G6PD-normal, by sex (A). G6PD activity of patients by G6PD status (deficient, intermediate, normal), by sex (B) .....                                  | 10 |
| Figure S2 Proportion of patients who were G6PD-deficient, G6PD-intermediate, or G6PD-normal, by treatment.....                                                                                                                         | 11 |
| Table S8 Primary outcome by municipality: tafenoquine appropriate use and appropriate non-use in patients $\geq 16$ years old according to G6PD activity by facility level and type of facility and overall (primary population) ..... | 12 |
| Table S9 Daily primaquine (7-day or 14-day) appropriate use and appropriate non-use in patients $\geq 6$ months old according to G6PD activity by facility level and type of facility and overall. ....                                | 13 |
| Table S10 Primaquine appropriate use and appropriate non-use according to G6PD activity in patients $\geq 6$ months old by facility level and type of facility, and overall (primary population).....                                  | 14 |
| Table S11 Characteristics of all patients receiving primaquine and by facility level and type of facility and overall (primary population)....                                                                                         | 15 |
| Table S12 Baseline socio-demographic and clinical characteristics of patients with mixed <i>P. vivax/P. falciparum</i> infections, by treatment group. ....                                                                            | 16 |
| Table S13 G6PD testing and G6PD status of patients with mixed infections, by treatment group. ....                                                                                                                                     | 17 |
| Table S14 Malaria history of patients with mixed infections, by facility level. ....                                                                                                                                                   | 18 |
| Table S15 Pre-treatment haemoglobin levels by treatment group (primary population).....                                                                                                                                                | 19 |
| Table S16 Haemoglobin levels, overall and by facility level and municipality (primary population).....                                                                                                                                 | 20 |
| Table S17 Day 5 follow-up outcomes (safety population).....                                                                                                                                                                            | 21 |
| Study protocol.....                                                                                                                                                                                                                    | 22 |
| Statistical analysis plan.....                                                                                                                                                                                                         | 63 |

**Table S1 Additional socio-demographic and baseline characteristics (primary population).**

| Characteristic           | TQ (n=2685) | PQ             |                |                | All (n=3228) | No TQ or PQ (n=113) |
|--------------------------|-------------|----------------|----------------|----------------|--------------|---------------------|
|                          |             | 7-day (n=2631) | 14-day (n=257) | Weekly (n=340) |              |                     |
| <b>Age class, years</b>  |             |                |                |                |              |                     |
| Birth to <5              | 0           | 98 (3.7)       | 7 (2.7)        | 8 (2.4)        | 113 (3.5)    | 7 (6.2)             |
| ≥5 to <16                | 5 (0.2)     | 447 (17.0)     | 26 (10.1)      | 36 (10.6)      | 509 (15.8)   | 5 (4.4)             |
| ≥16 to <30               | 718 (26.7)  | 588 (22.3)     | 62 (24.1)      | 86 (25.3)      | 736 (22.8)   | 52 (46.0)           |
| ≥30 to <50               | 1283 (47.8) | 967 (36.8)     | 110 (42.8)     | 144 (42.4)     | 1221 (37.8)  | 43 (38.1)           |
| ≥50 to <70               | 621 (23.1)  | 483 (18.4)     | 50 (19.5)      | 58 (17.1)      | 591 (18.3)   | 6 (5.3)             |
| ≥70                      | 58 (2.2)    | 48 (1.8)       | 2 (0.8)        | 8 (2.4)        | 58 (1.8)     | 0                   |
| <b>Weight class, kg</b>  |             |                |                |                |              |                     |
| ≥5 to <50                | 56 (2.1)    | 403 (15.3)     | 18 (7.0)       | 34 (10.0)      | 455 (14.1)   | 14 (12.4)           |
| ≥50 to <70               | 870 (32.4)  | 833 (31.7)     | 79 (30.7)      | 103 (30.3)     | 1015 (31.4)  | 41 (36.3)           |
| ≥70 to <90               | 972 (36.2)  | 821 (31.2)     | 79 (30.7)      | 122 (35.9)     | 1022 (31.7)  | 30 (26.5)           |
| ≥90 to <120              | 380 (14.2)  | 222 (8.4)      | 32 (12.5)      | 38 (11.2)      | 292 (9.0)    | 7 (6.2)             |
| ≥120                     | 37 (1.4)    | 23 (0.9)       | 4 (1.6)        | 2 (0.6)        | 29 (0.9)     | 0                   |
| Missing                  | 370 (13.8)  | 329 (12.5)     | 45 (17.5)      | 41 (12.1)      | 415 (12.9)   | 21 (18.6)           |
| <b>Education</b>         |             |                |                |                |              |                     |
| Illiterate               | 44 (1.6)    | 59 (2.2)       | 2 (0.8)        | 11 (3.2)       | 72 (2.2)     | 2 (1.8)             |
| 1st to 5th year          | 340 (12.7)  | 420 (16.0)     | 31 (12.1)      | 52 (15.3)      | 503 (15.6)   | 6 (5.3)             |
| 5th year                 | 91 (3.4)    | 122 (4.6)      | 14 (5.4)       | 18 (5.3)       | 154 (4.8)    | 5 (4.4)             |
| 6th-9th year             | 402 (15.0)  | 506 (19.2)     | 44 (17.1)      | 59 (17.4)      | 609 (18.9)   | 19 (16.8)           |
| Complete basic education | 384 (14.3)  | 210 (8.0)      | 30 (11.7)      | 41 (12.1)      | 281 (8.7)    | 11 (9.7)            |
| Incomplete high school   | 432 (16.1)  | 335 (12.7)     | 42 (16.3)      | 48 (14.1)      | 425 (13.2)   | 24 (21.2)           |
| Complete high school     | 759 (28.3)  | 690 (26.2)     | 64 (24.9)      | 83 (24.4)      | 837 (25.9)   | 32 (28.3)           |
| Incomplete college       | 66 (2.5)    | 45 (1.7)       | 10 (3.9)       | 4 (1.2)        | 59 (1.8)     | 1 (0.9)             |
| Complete college         | 151 (5.6)   | 109 (4.1)      | 12 (4.7)       | 11 (3.2)       | 132 (4.1)    | 6 (5.3)             |
| Not applicable           | 0           | 111 (4.2)      | 7 (2.7)        | 9 (2.6)        | 127 (3.9)    | 6 (5.3)             |
| Missing                  | 16 (0.6)    | 24 (0.9)       | 1 (0.4)        | 4 (1.2)        | 29 (0.9)     | 1 (0.9)             |
| <b>Occupation</b>        |             |                |                |                |              |                     |
| Agriculture              | 154 (5.7)   | 207 (7.9)      | 21 (8.2)       | 25 (7.4)       | 253 (7.8)    | 7 (6.2)             |
| Livestock                | 2 (0.1)     | 8 (0.3)        | 1 (0.4)        | 3 (0.9)        | 12 (0.4)     | 0                   |
| Household                | 400 (14.9)  | 618 (23.5)     | 77 (30.0)      | 75 (22.1)      | 770 (23.9)   | 32 (28.3)           |
| Tourism                  | 116 (4.3)   | 143 (5.4)      | 13 (5.1)       | 8 (2.4)        | 164 (5.1)    | 4 (3.5)             |
| Gold digging             | 32 (1.2)    | 22 (0.8)       | 1 (0.4)        | 4 (1.2)        | 27 (0.8)     | 2 (1.8)             |
| Farming                  | 36 (1.3)    | 54 (2.1)       | 2 (0.8)        | 8 (2.4)        | 64 (2.0)     | 1 (0.9)             |
| Hunting/fishing          | 16 (0.6)    | 25 (1.0)       | 2 (0.8)        | 6 (1.8)        | 33 (1.0)     | 1 (0.9)             |
| Construction             | 4 (0.1)     | 3 (0.1)        | 1 (0.4)        | 1 (0.3)        | 5 (0.2)      | 0                   |
| Mining                   | 3 (0.1)     | 3 (0.1)        | 1 (0.4)        | 0              | 4 (0.1)      | 1 (0.9)             |
| Traveller                | 39 (1.5)    | 36 (1.4)       | 2 (0.8)        | 3 (0.9)        | 41 (1.3)     | 0                   |
| Other                    | 1789 (66.6) | 1456 (55.3)    | 128 (49.8)     | 192 (56.5)     | 1776 (55.0)  | 61 (54.0)           |
| Missing                  | 94 (3.5)    | 56 (2.1)       | 8 (3.1)        | 15 (4.4)       | 79 (2.4)     | 4 (3.5)             |

Data are n (%). Key socio-demographic and baseline data are included in table 1 in the main paper.

TQ, tafenoquine; PQ, primaquine.

**Table S2 Baseline socio-demographic and clinical characteristics of patients, by health facility level (primary population).**

| Characteristic                      | Higher/medium-level facilities |                         |              | Lower-level facilities    |                          |              | Overall (n=6026) |
|-------------------------------------|--------------------------------|-------------------------|--------------|---------------------------|--------------------------|--------------|------------------|
|                                     | Hospital (n=753)               | Emergency care (n=4035) | All (n=4788) | Basic health unit (n=892) | Operational base (n=346) | All (n=1238) |                  |
| Municipality                        |                                |                         |              |                           |                          |              |                  |
| Manaus                              | 753 (100)                      | 667 (16.5)              | 1420 (29.7)  | 117 (13.1)                | 303 (87.6)               | 420 (33.9)   | 1840 (30.5)      |
| Porto Velho                         | 0                              | 3368 (83.5)             | 3368 (70.3)  | 775 (86.9)                | 43 (12.4)                | 818 (66.1)   | 4186 (69.5)      |
| Age, years                          | 38.0 (14.9)                    | 37.0 (16.3)             | 37.2 (16.1)  | 32.5 (16.7)               | 32.8 (16.1)              | 32.6 (16.5)  | 36.2 (16.3)      |
| Age class, years                    |                                |                         |              |                           |                          |              |                  |
| Birth to <5                         | 14 (1.9)                       | 65 (1.6)                | 79 (1.6)     | 30 (3.4)                  | 11 (3.2)                 | 41 (3.3)     | 120 (2.0)        |
| ≥5 to <16                           | 29 (3.9)                       | 340 (8.4)               | 369 (7.7)    | 110 (12.3)                | 40 (11.6)                | 150 (12.1)   | 519 (8.6)        |
| ≥16 to <30                          | 187 (24.8)                     | 953 (23.6)              | 1140 (23.8)  | 273 (30.6)                | 93 (26.9)                | 366 (29.6)   | 1506 (25.0)      |
| ≥30 to <50                          | 350 (46.5)                     | 1730 (42.9)             | 2080 (43.4)  | 318 (35.7)                | 149 (43.1)               | 467 (37.7)   | 2547 (42.3)      |
| ≥50 to <70                          | 164 (21.8)                     | 859 (21.3)              | 1023 (21.4)  | 145 (16.3)                | 50 (14.5)                | 195 (15.8)   | 1218 (20.2)      |
| ≥70                                 | 9 (1.2)                        | 88 (2.2)                | 97 (2.0)     | 16 (1.8)                  | 3 (0.9)                  | 19 (1.5)     | 116 (1.9)        |
| Sex                                 |                                |                         |              |                           |                          |              |                  |
| Male                                | 472 (62.7)                     | 2638 (65.4)             | 3110 (65.0)  | 571 (64.0)                | 233 (67.3)               | 804 (64.9)   | 3914 (65.0)      |
| Female                              | 281 (37.3)                     | 1397 (34.6)             | 1678 (35.0)  | 321 (36.0)                | 113 (32.7)               | 434 (35.1)   | 2112 (35.0)      |
| Childbearing potential <sup>a</sup> | 192 (68.3)                     | 888 (63.6)              | 1080 (64.4)  | 204 (63.6)                | 78 (69.0)                | 282 (65.0)   | 1362 (64.5)      |
| Breastfeeding <sup>b</sup>          |                                |                         |              |                           |                          |              |                  |
| Yes                                 | 10 (5.2)                       | 45 (5.1)                | 55 (5.1)     | 14 (6.9)                  | 7 (9.0)                  | 21 (7.4)     | 76 (5.6)         |
| No                                  | 167 (87.0)                     | 806 (90.8)              | 973 (90.1)   | 155 (76.0)                | 70 (89.7)                | 225 (79.8)   | 1198 (88.0)      |
| Missing                             | 15 (7.8)                       | 37 (4.2)                | 52 (4.8)     | 35 (17.2)                 | 1 (1.3)                  | 36 (12.8)    | 88 (6.5)         |
| Pregnant <sup>b</sup>               |                                |                         |              |                           |                          |              |                  |
| Yes                                 | 11 (5.7)                       | 25 (2.8)                | 36 (3.3)     | 7 (3.4)                   | 4 (5.1)                  | 11 (3.9)     | 47 (3.5)         |
| No                                  | 181 (94.3)                     | 863 (97.2)              | 1044 (96.7)  | 197 (96.6)                | 74 (94.9)                | 271 (96.1)   | 1315 (96.5)      |
| Weight class, kg                    |                                |                         |              |                           |                          |              |                  |
| ≥5 to <50                           | 31 (4.1)                       | 317 (7.9)               | 348 (7.3)    | 119 (13.3)                | 58 (16.8)                | 177 (14.3)   | 525 (8.7)        |
| ≥50 to <70                          | 248 (32.9)                     | 1196 (29.6)             | 1444 (30.2)  | 362 (40.6)                | 120 (34.7)               | 482 (38.9)   | 1926 (32.0)      |
| ≥70 to <90                          | 255 (33.9)                     | 1354 (33.6)             | 1609 (33.6)  | 279 (31.3)                | 136 (39.3)               | 415 (33.5)   | 2024 (33.6)      |
| ≥90 to <120                         | 116 (15.4)                     | 475 (11.8)              | 591 (12.3)   | 63 (7.1)                  | 25 (7.2)                 | 88 (7.1)     | 679 (11.3)       |
| ≥120                                | 11 (1.5)                       | 45 (1.1)                | 56 (1.2)     | 6 (0.7)                   | 4 (1.2)                  | 10 (0.8)     | 66 (1.1)         |
| Missing                             | 92 (12.2)                      | 648 (16.1)              | 740 (15.5)   | 63 (7.1)                  | 3 (0.9)                  | 66 (5.3)     | 806 (13.4)       |
| Ethnicity                           |                                |                         |              |                           |                          |              |                  |
| Mixed                               | 713 (94.7)                     | 3310 (82.0)             | 4023 (84.0)  | 759 (85.1)                | 299 (86.4)               | 1058 (85.5)  | 5081 (84.3)      |
| White                               | 13 (1.7)                       | 545 (13.5)              | 558 (11.7)   | 67 (7.5)                  | 20 (5.8)                 | 87 (7.0)     | 645 (10.7)       |
| Black                               | 10 (1.3)                       | 143 (3.5)               | 153 (3.2)    | 44 (4.9)                  | 5 (1.4)                  | 49 (4.0)     | 202 (3.4)        |
| Indigenous                          | 5 (0.7)                        | 30 (0.7)                | 35 (0.7)     | 21 (2.4)                  | 6 (1.7)                  | 27 (2.2)     | 62 (1.0)         |
| Asian                               | 12 (1.6)                       | 7 (0.2)                 | 19 (0.4)     | 1 (0.1)                   | 16 (4.6)                 | 17 (1.4)     | 36 (0.6)         |
| Education                           |                                |                         |              |                           |                          |              |                  |
| Illiterate                          | 0                              | 78 (1.9)                | 78 (1.6)     | 35 (3.9)                  | 5 (1.4)                  | 40 (3.2)     | 118 (2.0)        |
| 1st to 5th year                     | 24 (3.2)                       | 542 (13.4)              | 566 (11.8)   | 229 (25.7)                | 54 (15.6)                | 283 (22.9)   | 849 (14.1)       |
| 5th year                            | 26 (3.5)                       | 135 (3.3)               | 161 (3.4)    | 63 (7.1)                  | 26 (7.5)                 | 89 (7.2)     | 250 (4.1)        |
| 6th-9th year                        | 72 (9.6)                       | 689 (17.1)              | 761 (15.9)   | 193 (21.6)                | 76 (22.0)                | 269 (21.7)   | 1030 (17.1)      |
| Complete basic education            | 305 (40.5)                     | 268 (6.6)               | 573 (12.0)   | 67 (7.5)                  | 36 (10.4)                | 103 (8.3)    | 676 (11.2)       |
| Incomplete high school              | 147 (19.5)                     | 591 (14.6)              | 738 (15.4)   | 95 (10.7)                 | 48 (13.9)                | 143 (11.6)   | 881 (14.6)       |
| Complete high school                | 129 (17.1)                     | 1271 (31.5)             | 1400 (29.2)  | 149 (16.7)                | 79 (22.8)                | 228 (18.4)   | 1628 (27.0)      |
| Incomplete college                  | 25 (3.3)                       | 92 (2.3)                | 117 (2.4)    | 6 (0.7)                   | 3 (0.9)                  | 9 (0.7)      | 126 (2.1)        |
| Complete college                    | 6 (0.8)                        | 269 (6.7)               | 275 (5.7)    | 11 (1.2)                  | 3 (0.9)                  | 14 (1.1)     | 289 (4.8)        |
| Not applicable                      | 15 (2.0)                       | 73 (1.8)                | 88 (1.8)     | 29 (3.3)                  | 16 (4.6)                 | 45 (3.6)     | 133 (2.2)        |
| Missing                             | 4 (0.5)                        | 27 (0.7)                | 31 (0.6)     | 15 (1.7)                  | 0                        | 15 (1.2)     | 46 (0.8)         |
| Occupation                          |                                |                         |              |                           |                          |              |                  |
| Agriculture                         | 10 (1.3)                       | 240 (5.9)               | 250 (5.2)    | 120 (13.5)                | 44 (12.7)                | 164 (13.2)   | 414 (6.9)        |
| Livestock                           | 2 (0.3)                        | 7 (0.2)                 | 9 (0.2)      | 3 (0.3)                   | 2 (0.6)                  | 5 (0.4)      | 14 (0.2)         |
| Household                           | 60 (8.0)                       | 641 (15.9)              | 701 (14.6)   | 392 (43.9)                | 109 (31.5)               | 501 (40.5)   | 1202 (19.9)      |
| Tourism                             | 2 (0.3)                        | 271 (6.7)               | 273 (5.7)    | 6 (0.7)                   | 5 (1.4)                  | 11 (0.9)     | 284 (4.7)        |
| Gold digging                        | 14 (1.9)                       | 36 (0.9)                | 50 (1.0)     | 6 (0.7)                   | 5 (1.4)                  | 11 (0.9)     | 61 (1.0)         |
| Farming                             | 0                              | 12 (0.3)                | 12 (0.3)     | 87 (9.8)                  | 2 (0.6)                  | 89 (7.2)     | 101 (1.7)        |
| Hunting/fishing                     | 0                              | 30 (0.7)                | 30 (0.6)     | 19 (2.1)                  | 1 (0.3)                  | 20 (1.6)     | 50 (0.8)         |
| Construction                        | 0                              | 5 (0.1)                 | 5 (0.1)      | 4 (0.4)                   | 0                        | 4 (0.3)      | 9 (0.1)          |
| Mining                              | 0                              | 6 (0.1)                 | 6 (0.1)      | 2 (0.2)                   | 0                        | 2 (0.2)      | 8 (0.1)          |
| Traveller                           | 6 (0.8)                        | 54 (1.3)                | 60 (1.3)     | 8 (0.9)                   | 12 (3.5)                 | 20 (1.6)     | 80 (1.3)         |
| Other                               | 575 (76.4)                     | 2660 (65.9)             | 3235 (67.6)  | 225 (25.2)                | 166 (48.0)               | 391 (31.6)   | 3626 (60.2)      |
| Missing                             | 84 (11.2)                      | 73 (1.8)                | 157 (3.3)    | 20 (2.2)                  | 0                        | 20 (1.6)     | 177 (2.9)        |

Data are n (%) and mean (standard deviation).

<sup>a</sup> Denominator for % is the number of females.

<sup>b</sup> Denominator for % is the number of females of childbearing potential (defined as age ≥16 to <50 years).

**Table S3 Baseline socio-demographic and clinical characteristics of patients, by sex (primary population).**

| Characteristic           | Male (n=3914) | Female (n=2112) |
|--------------------------|---------------|-----------------|
| Age, years               | 36.1 (15.8)   | 36.4 (17.1)     |
| Age class, years         |               |                 |
| Birth to <5              | 77 (2.0)      | 43 (2.0)        |
| ≥5 to <16                | 309 (7.9)     | 210 (9.9)       |
| ≥16 to <30               | 978 (25.0)    | 528 (25.0)      |
| ≥30 to <50               | 1713 (43.8)   | 834 (39.5)      |
| ≥50 to <70               | 770 (19.7)    | 448 (21.2)      |
| ≥70                      | 67 (1.7)      | 49 (2.3)        |
| Weight class, kg         |               |                 |
| ≥5 to <50                | 280 (7.2)     | 245 (11.6)      |
| ≥50 to <70               | 1094 (28.0)   | 832 (39.4)      |
| ≥70 to <90               | 1462 (37.4)   | 562 (26.6)      |
| ≥90 to <120              | 518 (13.2)    | 161 (7.6)       |
| ≥120                     | 58 (1.5)      | 8 (0.4)         |
| Missing                  | 502 (12.8)    | 304 (14.4)      |
| Ethnicity                |               |                 |
| Mixed                    | 3306 (84.5)   | 1775 (84.0)     |
| White                    | 411 (10.5)    | 234 (11.1)      |
| Black                    | 146 (3.7)     | 56 (2.7)        |
| Indigenous               | 30 (0.8)      | 32 (1.5)        |
| Asian                    | 21 (0.5)      | 15 (0.7)        |
| Education                |               |                 |
| Illiterate               | 80 (2.0)      | 38 (1.8)        |
| 1st to 5th year          | 595 (15.2)    | 254 (12.0)      |
| 5th year                 | 171 (4.4)     | 79 (3.7)        |
| 6th-9th year             | 700 (17.9)    | 330 (15.6)      |
| Complete basic education | 438 (11.2)    | 238 (11.3)      |
| Incomplete high school   | 558 (14.3)    | 323 (15.3)      |
| Complete high school     | 1016 (26.0)   | 612 (29.0)      |
| Incomplete college       | 84 (2.1)      | 42 (2.0)        |
| Complete college         | 155 (4.0)     | 134 (6.3)       |
| Not applicable           | 89 (2.3)      | 44 (2.1)        |
| Missing                  | 28 (0.7)      | 18 (0.9)        |
| Occupation               |               |                 |
| Agriculture              | 288 (7.4)     | 126 (6.0)       |
| Livestock                | 12 (0.3)      | 2 (0.1)         |
| Household                | 616 (15.7)    | 586 (27.7)      |
| Tourism                  | 174 (4.4)     | 110 (5.2)       |
| Gold digging             | 39 (1.0)      | 22 (1.0)        |
| Farming                  | 72 (1.8)      | 29 (1.4)        |
| Hunting/fishing          | 38 (1.0)      | 12 (0.6)        |
| Construction             | 9 (0.2)       | 0               |
| Mining                   | 7 (0.2)       | 1 (0.0)         |
| Traveller                | 58 (1.5)      | 22 (1.0)        |
| Other                    | 2490 (63.6)   | 1136 (53.8)     |
| Missing                  | 111 (2.8)     | 66 (3.1)        |

Data are n (%) and mean (standard deviation).

**Table S4 Malaria history by facility level (primary population).**

| Characteristic                              | Higher/medium-level facilities |                         |              | Lower-level facilities    |                          |              | Overall (n=6026) |
|---------------------------------------------|--------------------------------|-------------------------|--------------|---------------------------|--------------------------|--------------|------------------|
|                                             | Hospital (n=753)               | Emergency care (n=4035) | All (n=4788) | Basic health unit (n=892) | Operational base (n=346) | All (n=1238) |                  |
| Diagnostic test                             |                                |                         |              |                           |                          |              |                  |
| Thick blood smear                           | 731 (97.1)                     | 3979 (98.6)             | 4710 (98.4)  | 847 (95.0)                | 346 (100)                | 1193 (96.4)  | 5903 (98.0)      |
| Rapid diagnostic test                       | 22 (2.9)                       | 21 (0.5)                | 43 (0.9)     | 44 (4.9)                  | 0                        | 44 (3.6)     | 87 (1.4)         |
| Polymerase chain reaction                   | 0                              | 35 (0.9)                | 35 (0.7)     | 1 (0.1)                   | 0                        | 1 (0.1)      | 36 (0.6)         |
| Parasitaemia                                |                                |                         |              |                           |                          |              |                  |
| n (%)                                       | 0                              | 182 (4.5)               | 182 (3.8)    | 2 (0.2)                   | 44 (12.7)                | 46 (3.7)     | 228 (3.8)        |
| Mean (SD), per mm <sup>3</sup>              | –                              | 12.5 (8.0)              | 12.5 (8.0)   | 30.0 (0.0)                | 14.1 (9.2)               | 14.8 (9.6)   | 13.0 (8.4)       |
| Semi-quantitative parasitaemia <sup>a</sup> |                                |                         |              |                           |                          |              |                  |
| < half cross                                | 72 (9.6)                       | 410 (10.2)              | 482 (10.1)   | 168 (18.8)                | 78 (22.5)                | 246 (19.9)   | 728 (12.1)       |
| Half cross                                  | 65 (8.6)                       | 243 (6.0)               | 308 (6.4)    | 90 (10.1)                 | 46 (13.3)                | 136 (11.0)   | 444 (7.4)        |
| 1 cross                                     | 92 (12.2)                      | 665 (16.5)              | 757 (15.8)   | 200 (22.4)                | 82 (23.7)                | 282 (22.8)   | 1039 (17.2)      |
| 2 crosses                                   | 490 (65.1)                     | 2358 (58.4)             | 2848 (59.5)  | 341 (38.2)                | 133 (38.4)               | 474 (38.3)   | 3322 (55.1)      |
| 3 crosses                                   | 12 (1.6)                       | 299 (7.4)               | 311 (6.5)    | 48 (5.4)                  | 7 (2.0)                  | 55 (4.4)     | 366 (6.1)        |
| 4 crosses                                   | 0                              | 5 (0.1)                 | 5 (0.1)      | 1 (0.1)                   | 0                        | 1 (0.1)      | 6 (0.1)          |
| Missing                                     | 22 (2.9)                       | 55 (1.4)                | 77 (1.6)     | 44 (4.9)                  | 0                        | 44 (3.6)     | 121 (2.0)        |
| Blood transfusion in last 60 days           |                                |                         |              |                           |                          |              |                  |
| Yes                                         | 3 (0.4)                        | 15 (0.4)                | 18 (0.4)     | 4 (0.4)                   | 0                        | 4 (0.3)      | 22 (0.4)         |
| No                                          | 749 (99.5)                     | 3683 (91.3)             | 4432 (92.6)  | 870 (97.5)                | 331 (95.7)               | 1201 (97.0)  | 5633 (93.5)      |
| Missing                                     | 1 (0.1)                        | 337 (8.4)               | 338 (7.1)    | 18 (2.0)                  | 15 (4.3)                 | 33 (2.7)     | 371 (6.2)        |
| <i>P. falciparum</i> in the last 40 days    |                                |                         |              |                           |                          |              |                  |
| Yes                                         | 21 (2.8)                       | 32 (0.8)                | 53 (1.1)     | 7 (0.8)                   | 2 (0.6)                  | 9 (0.7)      | 62 (1.0)         |
| No                                          | 732 (97.2)                     | 4003 (99.2)             | 4735 (98.9)  | 885 (99.2)                | 344 (99.4)               | 1229 (99.3)  | 5964 (99.0)      |

Data are n (%) or mean (standard deviation).

<sup>a</sup> Half-cross (200–300 parasites/mm<sup>3</sup>); 1 cross (301–500 parasites/mm<sup>3</sup>); 2 crosses (501–10,000 parasites/mm<sup>3</sup>); 3 crosses (10,001–100,000 parasites/mm<sup>3</sup>); and 4 crosses (>100,001 parasites/mm<sup>3</sup>).

**Table S5 Malaria history by treatment group overall and by municipality (primary population).**

| Overall (n=6026)                            | TQ                     | PQ                    |                       |                       | No TQ or PQ<br>(n=113)        |              |
|---------------------------------------------|------------------------|-----------------------|-----------------------|-----------------------|-------------------------------|--------------|
|                                             | (n=2685)               | 7-day (n=2631)        | 14-day (n=257)        | Weekly (n=340)        |                               | All (n=3228) |
| Diagnostic test                             |                        |                       |                       |                       |                               |              |
| Thick blood smear                           | 2641 (98.4)            | 2566 (97.5)           | 254 (98.8)            | 331 (97.4)            | 3151 (97.6)                   | 111 (98.2)   |
| Rapid diagnostic test                       | 24 (0.9)               | 51 (1.9)              | 3 (1.2)               | 7 (2.1)               | 61 (1.9)                      | 2 (1.8)      |
| Polymerase chain reaction                   | 20 (0.7)               | 14 (0.5)              | 0                     | 2 (0.6)               | 16 (0.5)                      | 0            |
| Parasitaemia                                |                        |                       |                       |                       |                               |              |
| N                                           | 91 (3.4)               | 104 (4.0)             | 1 (0.4)               | 25 (7.4)              | 130 (4.0)                     | 7 (6.2)      |
| Mean (SD), per mm <sup>3</sup>              | 12.5 (8.7)             | 13.3 (8.3)            | 17.0                  | 12.4 (8.4)            | 13.2 (8.2)                    | 14.7 (8.0)   |
| Semi-quantitative parasitaemia <sup>a</sup> |                        |                       |                       |                       |                               |              |
| < half cross                                | 285 (10.6)             | 344 (13.1)            | 20 (7.8)              | 60 (17.6)             | 424 (13.1)                    | 19 (16.8)    |
| Half cross                                  | 205 (7.6)              | 190 (7.2)             | 12 (4.7)              | 25 (7.4)              | 227 (7.0)                     | 12 (10.6)    |
| 1 cross                                     | 441 (16.4)             | 472 (17.9)            | 49 (19.1)             | 62 (18.2)             | 583 (18.1)                    | 15 (13.3)    |
| 2 crosses                                   | 1531 (57.0)            | 1406 (53.4)           | 155 (60.3)            | 171 (50.3)            | 1732 (53.7)                   | 59 (52.2)    |
| 3 crosses                                   | 176 (6.6)              | 156 (5.9)             | 17 (6.6)              | 13 (3.8)              | 186 (5.8)                     | 4 (3.5)      |
| 4 crosses                                   | 3 (0.1)                | 0                     | 1 (0.4)               | 0                     | 1 (0.0)                       | 2 (1.8)      |
| Missing                                     | 44 (1.6)               | 63 (2.4)              | 3 (1.2)               | 9 (2.6)               | 75 (2.3)                      | 2 (1.8)      |
| Blood transfusion in last 60 days           |                        |                       |                       |                       |                               |              |
| Yes                                         | 7 (0.3)                | 13 (0.5)              | 1 (0.4)               | 1 (0.3)               | 15 (0.5)                      | 0            |
| No                                          | 2569 (95.7)            | 2410 (91.6)           | 233 (90.7)            | 318 (93.5)            | 2961 (91.7)                   | 103 (91.2)   |
| Missing                                     | 109 (4.1)              | 208 (7.9)             | 23 (8.9)              | 21 (6.2)              | 252 (7.8)                     | 10 (8.8)     |
| <i>P. falciparum</i> in the last 40 days    |                        |                       |                       |                       |                               |              |
| Yes                                         | 23 (0.9)               | 26 (1.0)              | 9 (3.5)               | 3 (0.9)               | 38 (1.2)                      | 1 (0.9)      |
| No                                          | 2662 (99.1)            | 2605 (99.0)           | 248 (96.5)            | 337 (99.1)            | 3190 (98.8)                   | 112 (99.1)   |
| <b>Manaus (n=1840)</b>                      | <b>TQ<br/>(n=921)</b>  | <b>PQ</b>             |                       |                       | <b>No TQ or PQ<br/>(n=46)</b> |              |
|                                             |                        | <b>7-day (n=707)</b>  | <b>14-day (n=53)</b>  | <b>Weekly (n=113)</b> | <b>All (n=873)</b>            |              |
| Diagnostic test                             |                        |                       |                       |                       |                               |              |
| Thick blood smear                           | 912 (99.0)             | 696 (98.4)            | 53 (100)              | 113 (100)             | 862 (98.7)                    | 44 (95.7)    |
| Rapid diagnostic test                       | 9 (1.0)                | 11 (1.6)              | 0                     | 0                     | 11 (1.3)                      | 2 (4.3)      |
| Polymerase chain reaction                   | 0                      | 0                     | 0                     | 0                     | 0                             | 0            |
| Parasitaemia                                |                        |                       |                       |                       |                               |              |
| N                                           | 14 (1.5)               | 14 (2.0)              | 0                     | 16 (14.2)             | 30 (3.4)                      | 2 (4.3)      |
| Mean (SD), per mm <sup>3</sup>              | 15.1 (10.1)            | 14.1 (9.2)            | –                     | 12.2 (9.1)            | 13.1 (9.0)                    | 12.5 (10.6)  |
| Semi-quantitative parasitaemia <sup>a</sup> |                        |                       |                       |                       |                               |              |
| < half cross                                | 97 (10.5)              | 89 (12.6)             | 5 (9.4)               | 28 (24.8)             | 122 (14.0)                    | 8 (17.4)     |
| Half cross                                  | 80 (8.7)               | 59 (8.3)              | 2 (3.8)               | 12 (10.6)             | 73 (8.4)                      | 7 (15.2)     |
| 1 cross                                     | 126 (13.7)             | 103 (14.6)            | 8 (15.1)              | 12 (10.6)             | 123 (14.1)                    | 3 (6.5)      |
| 2 crosses                                   | 575 (62.4)             | 402 (56.9)            | 36 (67.9)             | 58 (51.3)             | 496 (56.8)                    | 25 (54.3)    |
| 3 crosses                                   | 33 (3.6)               | 43 (6.1)              | 2 (3.8)               | 3 (2.7)               | 48 (5.5)                      | 1 (2.2)      |
| 4 crosses                                   | 1 (0.1)                | 0                     | 0                     | 0                     | 0                             | 0            |
| Missing                                     | 9 (1.0)                | 11 (1.6)              | 0                     | 0                     | 11 (1.3)                      | 2 (4.3)      |
| Blood transfusion in last 60 days           |                        |                       |                       |                       |                               |              |
| Yes                                         | 1 (0.1)                | 3 (0.4)               | 0                     | 0                     | 3 (0.3)                       | 0            |
| No                                          | 854 (92.7)             | 560 (79.2)            | 46 (86.8)             | 97 (85.8)             | 703 (80.5)                    | 40 (87.0)    |
| Missing                                     | 66 (7.2)               | 144 (20.4)            | 7 (13.2)              | 16 (14.2)             | 167 (19.1)                    | 6 (13.0)     |
| <i>P. falciparum</i> in the last 40 days    |                        |                       |                       |                       |                               |              |
| Yes                                         | 15 (1.6)               | 9 (1.3)               | 1 (1.9)               | 1 (0.9)               | 11 (1.3)                      | 0            |
| No                                          | 906 (98.4)             | 698 (98.7)            | 52 (98.1)             | 112 (99.1)            | 862 (98.7)                    | 46 (100)     |
| <b>Porto Velho (n=4186)</b>                 | <b>TQ<br/>(n=1764)</b> | <b>PQ</b>             |                       |                       | <b>No TQ or PQ<br/>(n=67)</b> |              |
|                                             |                        | <b>7-day (n=1924)</b> | <b>14-day (n=204)</b> | <b>Weekly (n=227)</b> | <b>All (n=2355)</b>           |              |
| Diagnostic test                             |                        |                       |                       |                       |                               |              |
| Thick blood smear                           | 1729 (98.0)            | 1870 (97.2)           | 201 (98.5)            | 218 (96.0)            | 2289 (97.2)                   | 67 (100)     |
| Rapid diagnostic test                       | 15 (0.9)               | 40 (2.1)              | 3 (1.5)               | 7 (3.1)               | 50 (2.1)                      | 0            |
| Polymerase chain reaction                   | 20 (1.1)               | 14 (0.7)              | 0                     | 2 (0.9)               | 16 (0.7)                      | 0            |
| Parasitaemia                                |                        |                       |                       |                       |                               |              |
| N                                           | 77 (4.4)               | 90 (4.7)              | 1 (0.5)               | 9 (4.0)               | 100 (4.2)                     | 5 (7.5)      |
| Mean (SD), per mm <sup>3</sup>              | 12.0 (8.4)             | 13.2 (8.2)            | 17.0                  | 12.7 (7.3)            | 13.2 (8.0)                    | 15.6 (8.0)   |
| Semi-quantitative parasitaemia <sup>a</sup> |                        |                       |                       |                       |                               |              |
| < half cross                                | 188 (10.7)             | 255 (13.3)            | 15 (7.4)              | 32 (14.1)             | 302 (12.8)                    | 11 (16.4)    |
| Half cross                                  | 125 (7.1)              | 131 (6.8)             | 10 (4.9)              | 13 (5.7)              | 154 (6.5)                     | 5 (7.5)      |
| 1 cross                                     | 315 (17.9)             | 369 (19.2)            | 41 (20.1)             | 50 (22.0)             | 460 (19.5)                    | 12 (17.9)    |
| 2 crosses                                   | 956 (54.2)             | 1004 (52.2)           | 119 (58.3)            | 113 (49.8)            | 1236 (52.5)                   | 34 (50.7)    |
| 3 crosses                                   | 143 (8.1)              | 113 (5.9)             | 15 (7.4)              | 10 (4.4)              | 138 (5.9)                     | 3 (4.5)      |
| 4 crosses                                   | 2 (0.1)                | 0                     | 1 (0.5)               | 0                     | 1 (0.0)                       | 2 (3.0)      |
| Missing                                     | 35 (2.0)               | 52 (2.7)              | 3 (1.5)               | 9 (4.0)               | 64 (2.7)                      | 0            |
| Blood transfusion in last 60 days           |                        |                       |                       |                       |                               |              |
| Yes                                         | 6 (0.3)                | 10 (0.5)              | 1 (0.5)               | 1 (0.4)               | 12 (0.5)                      | 0            |
| No                                          | 1715 (97.2)            | 1850 (96.2)           | 187 (91.7)            | 221 (97.4)            | 2258 (95.9)                   | 63 (94.0)    |
| Missing                                     | 43 (2.4)               | 64 (3.3)              | 16 (7.8)              | 5 (2.2)               | 85 (3.6)                      | 4 (6.0)      |
| <i>P. falciparum</i> in the last 40 days    |                        |                       |                       |                       |                               |              |
| Yes                                         | 8 (0.5)                | 17 (0.9)              | 8 (3.9)               | 2 (0.9)               | 27 (1.1)                      | 1 (1.5)      |
| No                                          | 1756 (99.5)            | 1907 (99.1)           | 196 (96.1)            | 225 (99.1)            | 2328 (98.9)                   | 66 (98.5)    |

Data are n (%) or mean (standard deviation). TQ, tafenoquine, PQ, primaquine.

<sup>a</sup> Half-cross (200–300 parasites/mm<sup>3</sup>); 1 cross (301–500 parasites/mm<sup>3</sup>); 2 crosses (501–10,000 parasites/mm<sup>3</sup>); 3 crosses (10,001–100,000 parasites/mm<sup>3</sup>); and 4 crosses (>100,001 parasites/mm<sup>3</sup>).



**Table S6 Quantitative G6PD test results by treatment, overall and by municipality (primary population).**

| Overall (n=6026)         | TQ (n=2685)    | PQ             |                |            | All (n=3228) | No TQ or PQ (n=113) |
|--------------------------|----------------|----------------|----------------|------------|--------------|---------------------|
|                          | 7-day (n=2631) | 14-day (n=257) | Weekly (n=340) |            |              |                     |
| No G6PD test result      | 0              | 254 (9.7)      | 17 (6.6)       | 3 (0.9)    | 274 (8.5)    | 40 (35.4)           |
| G6PD test result         | 2685 (100)     | 2377 (90.3)    | 240 (93.4)     | 337 (99.1) | 2954 (91.5)  | 73 (64.6)           |
| G6PD test                | 2646 (98.5)    | 2332 (98.1)    | 232 (96.7)     | 328 (97.3) | 2892 (97.9)  | 72 (98.6)           |
| G6PD patient card        | 39 (1.5)       | 45 (1.9)       | 8 (3.3)        | 9 (2.7)    | 62 (2.1)     | 1 (1.4)             |
| G6PD status <sup>a</sup> |                |                |                |            |              |                     |
| Deficient                | 5 (0.2)        | 83 (3.5)       | 14 (5.8)       | 308 (91.4) | 405 (13.7)   | 4 (5.5)             |
| Intermediate             | 11 (0.4)       | 1424 (59.9)    | 56 (23.3)      | 13 (3.9)   | 1493 (50.5)  | 18 (24.7)           |
| Normal                   | 2669 (99.4)    | 870 (36.6)     | 170 (70.8)     | 16 (4.7)   | 1056 (35.7)  | 51 (69.9)           |

  

| Manaus (n=1840)          | TQ (n=921)    | PQ            |                |            | All (n=873) | No TQ or PQ (n=46) |
|--------------------------|---------------|---------------|----------------|------------|-------------|--------------------|
|                          | 7-day (n=707) | 14-day (n=53) | Weekly (n=113) |            |             |                    |
| No G6PD test result      | 0             | 92 (13.0)     | 5 (9.4)        | 3 (2.7)    | 100 (11.5)  | 15 (32.6)          |
| G6PD test result         | 921 (100)     | 615 (87.0)    | 48 (90.6)      | 110 (97.3) | 773 (88.5)  | 31 (67.4)          |
| G6PD test                | 897 (97.4)    | 598 (97.2)    | 47 (97.9)      | 105 (95.5) | 750 (97.0)  | 31 (100)           |
| G6PD patient card        | 24 (2.6)      | 17 (2.8)      | 1 (2.1)        | 5 (4.5)    | 23 (3.0)    | 0                  |
| G6PD status <sup>a</sup> |               |               |                |            |             |                    |
| Deficient                | 2 (0.2)       | 37 (6.0)      | 2 (4.2)        | 106 (96.4) | 145 (18.8)  | 2 (6.5)            |
| Intermediate             | 7 (0.8)       | 400 (65.0)    | 12 (25.0)      | 4 (3.6)    | 416 (53.8)  | 10 (32.3)          |
| Normal                   | 912 (99.0)    | 178 (28.9)    | 34 (70.8)      | 0          | 212 (27.4)  | 19 (61.3)          |

  

| Porto Velho (n=4186)     | TQ (n=1764)    | PQ             |                |            | All (n=2355) | No TQ or PQ (n=67) |
|--------------------------|----------------|----------------|----------------|------------|--------------|--------------------|
|                          | 7-day (n=1924) | 14-day (n=204) | Weekly (n=227) |            |              |                    |
| No G6PD test result      | 0              | 162 (8.4)      | 12 (5.9)       | 0          | 174 (7.4)    | 25 (37.3)          |
| G6PD test result         | 1764 (100)     | 1762 (91.6)    | 192 (94.1)     | 227 (100)  | 2181 (92.6)  | 42 (62.7)          |
| G6PD test                | 1749 (99.1)    | 1734 (98.4)    | 185 (96.4)     | 223 (98.2) | 2142 (98.2)  | 41 (97.6)          |
| G6PD patient card        | 15 (0.9)       | 28 (1.6)       | 7 (3.6)        | 4 (1.8)    | 39 (1.8)     | 1 (2.4)            |
| G6PD status <sup>a</sup> |                |                |                |            |              |                    |
| Deficient                | 3 (0.2)        | 46 (2.6)       | 12 (6.3)       | 202 (89.0) | 260 (11.9)   | 2 (4.8)            |
| Intermediate             | 4 (0.2)        | 1024 (58.1)    | 44 (22.9)      | 9 (4.0)    | 1077 (49.4)  | 8 (19.0)           |
| Normal                   | 1757 (99.6)    | 692 (39.3)     | 136 (70.8)     | 16 (7.0)   | 844 (38.7)   | 32 (76.2)          |

Values are n (%). TQ, tafenoquine; PQ, primaquine.

<sup>a</sup> G6PD status was determined as a proportion of those patients who had a G6PD test result and defined as deficient ( $\leq 4.0$  U/g Hb), intermediate ( $4.1-6.0$  U/g Hb), or normal ( $\geq 6.1$  U/g Hb).

**Table S7 Quantitative G6PD testing by age group.**

| <b>Outcome</b>           | <b>≥16 years old (n=5387)</b> | <b>&lt;16 years old (n=639)</b> |
|--------------------------|-------------------------------|---------------------------------|
| No G6PD test result      | 246 (4.6)                     | 68 (10.6)                       |
| G6PD test result         | 5141 (95.4)                   | 571 (89.4)                      |
| G6PD status <sup>a</sup> |                               |                                 |
| Deficient                | 363 (7.1)                     | 51 (8.9)                        |
| Intermediate             | 1407 (27.4)                   | 115 (20.1)                      |
| Normal                   | 3371 (65.6)                   | 405 (70.9)                      |

Values are n (%).

<sup>a</sup> G6PD status was determined as a proportion of those patients who had a G6PD test result and defined as deficient ( $\leq 4.0$  U/g Hb), intermediate ( $4.1-6.0$  U/g Hb), or normal ( $\geq 6.1$  U/g Hb).

**Figure S1 Proportion of patients who were G6PD-deficient, G6PD-intermediate, or G6PD-normal, by sex (A). G6PD activity of patients by G6PD status (deficient, intermediate, normal), by sex (B).**

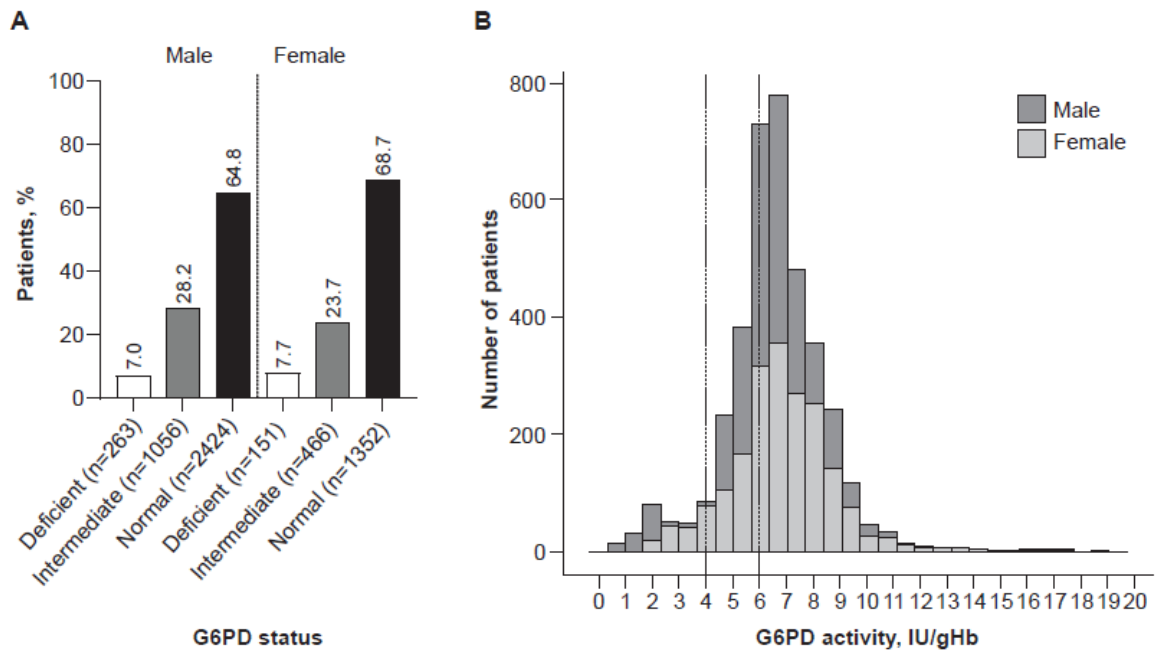

G6PD status was defined as deficient ( $\leq 4.0$  U/g Hb), intermediate ( $4.1-6.0$  U/g Hb), or normal ( $\geq 6.1$  U/g Hb). G6PD, glucose-6-phosphate dehydrogenase.

**Figure S2 Proportion of patients who were G6PD-deficient, G6PD-intermediate, or G6PD-normal, by treatment.**

Cell values are patients, %

| Treatment          | Deficient<br>(n=414) | Intermediate<br>(n=1522) | Normal<br>(n=3776) |
|--------------------|----------------------|--------------------------|--------------------|
| TQ (n=2685)        | 0.2                  | 0.4                      | 99.4               |
| 7-day PQ (n=2377)  | 3.5                  | 59.9                     | 36.6               |
| 14-day PQ (n=240)  | 5.8                  | 23.3                     | 70.8               |
| Weekly PQ (n=337)  | 91.4                 | 3.9                      | 4.7                |
| All PQ (n=2954)    | 13.7                 | 50.5                     | 35.7               |
| No TQ or PQ (n=73) | 5.5                  | 24.7                     | 69.9               |

**G6PD status**

G6PD status was defined as deficient ( $\leq 4.0$  U/g Hb), intermediate (4.1–6.0 U/g Hb), or normal ( $\geq 6.1$  U/g Hb). Patients with missing G6PD activity values are not included.

G6PD, glucose-6-phosphate dehydrogenase; TQ, tafenoquine; PQ, primaquine.

**Table S8 Primary outcome by municipality: tafenoquine appropriate use and appropriate non-use in patients ≥16 years old according to G6PD activity by facility level and type of facility and overall (primary population).**

| Outcome in Manaus                                                    | Higher/medium-level facilities |                        |                   | Lower-level facilities     |                          |                 | Overall (n=1840)  |
|----------------------------------------------------------------------|--------------------------------|------------------------|-------------------|----------------------------|--------------------------|-----------------|-------------------|
|                                                                      | Hospitals (n=753)              | Emergency care (n=667) | All (n=1420)      | Basic health units (n=117) | Operational base (n=303) | All (n=420)     |                   |
| Number of patients ≥16 years                                         | 710                            | 584                    | 1294              | 100                        | 259                      | 359             | 1653              |
| Total TQ use, n (%)                                                  | 520 (73.2)                     | 270 (46.2)             | 790 (61.1)        | 28 (28.0)                  | 101 (39.0)               | 129 (35.9)      | 919 (55.6)        |
| TQ appropriate                                                       | 519 (73.1)                     | 262 (44.9)             | 781 (60.4)        | 28 (28.0)                  | 101 (39.0)               | 129 (35.9)      | 910 (55.1)        |
| TQ inappropriate                                                     | 1 (0.1)                        | 8 (1.4)                | 9 (0.7)           | 0                          | 0                        | 0               | 9 (0.5)           |
| TQ appropriate non-use, n (%)                                        | 110 (15.5)                     | 264 (45.2)             | 374 (28.9)        | 69 (69.0)                  | 152 (58.7)               | 221 (61.6)      | 595 (36.0)        |
| TQ appropriate use and appropriate non-use <sup>a</sup> , n/N        | 629/630                        | 526/534                | 1155/1164         | 97/97                      | 253/253                  | 350/350         | 1505/1514         |
| TQ appropriate use and appropriate non-use <sup>a</sup> , % (95% CI) | 99.8 (99.1, 100)               | 98.5 (97.1, 99.4)      | 99.2 (98.5, 99.6) | 100 (96.3, 100)            | 100 (98.6, 100)          | 100 (99.0, 100) | 99.4 (98.9, 99.7) |

  

| Outcome in Porto Velho                                               | Higher/medium-level facilities |                         |                  | Lower-level facilities     |                         |                   | Overall (n=4186)  |
|----------------------------------------------------------------------|--------------------------------|-------------------------|------------------|----------------------------|-------------------------|-------------------|-------------------|
|                                                                      | Hospitals (n=0)                | Emergency care (n=3368) | All (n=3368)     | Basic health units (n=775) | Operational base (n=43) | All (n=818)       |                   |
| Number of patients ≥16 years                                         | 0                              | 3046                    | 3046             | 652                        | 36                      | 688               | 3734              |
| Total TQ use, n (%)                                                  | 0                              | 1508 (49.5)             | 1508 (49.5)      | 242 (37.1)                 | 11 (30.6)               | 253 (36.8)        | 1761 (47.2)       |
| TQ appropriate                                                       | 0                              | 1504 (49.4)             | 1504 (49.4)      | 239 (36.7)                 | 11 (30.6)               | 250 (36.3)        | 1754 (47.0)       |
| TQ inappropriate                                                     | 0                              | 4 (0.1)                 | 4 (0.1)          | 3 (0.5)                    | 0                       | 3 (0.4)           | 7 (0.2)           |
| TQ appropriate non-use, n (%)                                        | 0                              | 1048 (34.4)             | 1048 (34.4)      | 335 (51.4)                 | 22 (61.1)               | 357 (51.9)        | 1405 (37.6)       |
| TQ appropriate use and appropriate non-use <sup>a</sup> , n/N        | 0/0                            | 2552/2556               | 2552/2556        | 574/577                    | 33/33                   | 607/610           | 3159/3166         |
| TQ appropriate use and appropriate non-use <sup>a</sup> , % (95% CI) | –                              | 99.8 (99.6, 100)        | 99.8 (99.6, 100) | 99.5 (98.5, 99.9)          | 100 (89.4, 100)         | 99.5 (98.6, 99.9) | 99.8 (99.5, 99.9) |

<sup>a</sup> Calculated as: (TQ appropriate use + TQ appropriate non-use) / (Total TQ use + TQ appropriate non-use).  
TQ, tafenoquine.

**Table S9 Daily primaquine (7-day or 14-day) appropriate use and appropriate non-use in patients  $\geq 6$  months old according to G6PD activity by facility level and type of facility and overall.**

| Outcome                                                                 | Higher/medium-level facilities |                               |                      | Lower-level facilities          |                                 |                      | Overall<br>(n=6026)  |
|-------------------------------------------------------------------------|--------------------------------|-------------------------------|----------------------|---------------------------------|---------------------------------|----------------------|----------------------|
|                                                                         | Hospitals<br>(n=753)           | Emergency<br>care<br>(n=4035) | All<br>(n=4788)      | Basic<br>health unit<br>(n=892) | Operationa<br>l base<br>(n=346) | All<br>(n=1238)      |                      |
| Number of patients aged $\geq 6$ months                                 | 751                            | 4033                          | 4784                 | 891                             | 345                             | 1236                 | 6020                 |
| Total PQ use, n (%)                                                     | 183 (24.3)                     | 1995 (49.4)                   | 2178 (45.5)          | 536 (60.1)                      | 171 (49.4)                      | 707 (57.1)           | 2885<br>(47.9)       |
| PQ appropriate use                                                      | 176 (23.4)                     | 1715 (42.5)                   | 1891 (39.5)          | 465 (52.2)                      | 163 (47.2)                      | 628 (50.8)           | 2519<br>(41.8)       |
| PQ inappropriate use                                                    | 7 (3.8)                        | 280 (14.0)                    | 287 (13.2)           | 71 (13.2)                       | 8 (4.7)                         | 79 (11.2)            | 366 (12.7)           |
| PQ appropriate non-use, n (%)                                           | 30 (4.0)                       | 189 (4.7)                     | 219 (4.6)            | 78 (8.8)                        | 62 (18.0)                       | 140 (11.3)           | 359 (6.0)            |
| PQ appropriate use and appropriate non-use <sup>a</sup> ,<br>n/N        | 206/213                        | 1904/2184                     | 2110/2397            | 543/614                         | 225/233                         | 768/847              | 2878/3244            |
| PQ appropriate use and appropriate non-use <sup>a</sup> ,<br>% (95% CI) | 96.7<br>(93.3, 98.7)           | 87.2<br>(85.7, 88.6)          | 88.0<br>(86.7, 89.3) | 88.4<br>(85.6, 90.9)            | 96.6<br>(93.3, 98.5)            | 90.7<br>(88.5, 92.5) | 88.7<br>(87.6, 89.8) |

<sup>a</sup> Calculated as: (PQ appropriate use + PQ appropriate non-use) / (Total PQ use + PQ appropriate non-use).  
PQ, primaquine.

**Table S10 Primaquine appropriate use and appropriate non-use according to G6PD activity in patients ≥6 months old by facility level and type of facility, and overall (primary population).**

| Outcome in Manaus                                                    | Higher/medium-level facilities |                        |                   | Lower-level facilities     |                          |                   | Overall (n=1840)  |
|----------------------------------------------------------------------|--------------------------------|------------------------|-------------------|----------------------------|--------------------------|-------------------|-------------------|
|                                                                      | Hospitals (n=753)              | Emergency care (n=667) | All (n=1420)      | Basic health units (n=117) | Operational base (n=303) | All (n=420)       |                   |
| Number of patients ≥6 months                                         | 751                            | 666                    | 1417              | 117                        | 302                      | 419               | 1836              |
| Total PQ use, n (%)                                                  | 183 (24.4)                     | 365 (54.8)             | 548 (38.7)        | 70 (59.8)                  | 141 (46.7)               | 211 (50.4)        | 759 (41.3)        |
| PQ appropriate                                                       | 176 (23.4)                     | 248 (37.2)             | 424 (29.9)        | 66 (56.4)                  | 134 (44.4)               | 200 (47.7)        | 624 (34.0)        |
| PQ inappropriate                                                     | 7 (3.8)                        | 117 (32.1)             | 124 (22.6)        | 4 (5.7)                    | 7 (5.0)                  | 11 (5.2)          | 135 (17.8)        |
| PQ appropriate non-use, n (%)                                        | 30 (4.0)                       | 20 (3.0)               | 50 (3.5)          | 17 (14.5)                  | 60 (19.9)                | 77 (18.4)         | 127 (6.9)         |
| PQ appropriate use and appropriate non-use <sup>a</sup> , n/N        | 206/213                        | 268/385                | 474/598           | 83/87                      | 194/201                  | 277/288           | 751/886           |
| PQ appropriate use and appropriate non-use <sup>a</sup> , % (95% CI) | 96.7 (93.3, 98.7)              | 69.6 (64.7, 74.2)      | 79.3 (75.8, 82.4) | 95.4 (88.6, 98.7)          | 96.5 (93.0, 98.6)        | 96.2 (93.3, 98.1) | 84.8 (82.2, 87.1) |

  

| Outcome in Porto Velho                                               | Higher/medium-level facilities |                         |                   | Lower-level facilities     |                         |                   | Overall (n=4186)  |
|----------------------------------------------------------------------|--------------------------------|-------------------------|-------------------|----------------------------|-------------------------|-------------------|-------------------|
|                                                                      | Hospitals (n=0)                | Emergency care (n=3368) | All (n=3368)      | Basic health units (n=775) | Operational base (n=43) | All (n=818)       |                   |
| Number of patients ≥6 months                                         | 0                              | 3367                    | 3367              | 774                        | 43                      | 817               | 4184              |
| Total PQ use, n (%)                                                  | 0                              | 1630 (48.4)             | 1630 (48.4)       | 466 (60.2)                 | 30 (69.8)               | 496 (60.7)        | 2126 (50.8)       |
| PQ appropriate                                                       | 0                              | 1467 (43.6)             | 1467 (43.6)       | 399 (51.6)                 | 29 (67.4)               | 428 (52.4)        | 1895 (45.3)       |
| PQ inappropriate                                                     | 0                              | 163 (10.0)              | 163 (10.0)        | 67 (14.4)                  | 1 (3.3)                 | 68 (13.7)         | 231 (10.9)        |
| PQ appropriate non-use, n (%)                                        | 0                              | 169 (5.0)               | 169 (5.0)         | 61 (7.9)                   | 2 (4.7)                 | 63 (7.7)          | 232 (5.5)         |
| PQ appropriate use and appropriate non-use <sup>a</sup> , n/N        | –                              | 1636/1799               | 1636/1799         | 460/527                    | 31/32                   | 491/559           | 2127/2358         |
| PQ appropriate use and appropriate non-use <sup>a</sup> , % (95% CI) | –                              | 90.9 (89.5, 92.2)       | 90.9 (89.5, 92.2) | 87.3 (84.1, 90.0)          | 96.9 (83.8, 99.9)       | 87.8 (84.8, 90.4) | 90.2 (88.9, 91.4) |

<sup>a</sup> Calculated as: (PQ appropriate use + PQ appropriate non-use) / (Total PQ use + PQ appropriate non-use).  
PQ, primaquine.

**Table S11 Characteristics of all patients receiving primaquine and by facility level and type of facility and overall (primary population)**

| Treatment algorithm criteria                              | Higher/medium-level facilities |                          |                          | Lower-level facilities    |                          |                         | Overall (n=3228)         |
|-----------------------------------------------------------|--------------------------------|--------------------------|--------------------------|---------------------------|--------------------------|-------------------------|--------------------------|
|                                                           | Hospitals (n=208)              | Emergency care (n=2178)  | All (n=2386)             | Basic health unit (n=613) | Operational base (n=229) | All (n=842)             |                          |
| Treatment algorithm <sup>a</sup>                          |                                |                          |                          |                           |                          |                         |                          |
| Daily PQ, n                                               | 183                            | 1997                     | 2180                     | 537                       | 171                      | 708                     | 2888                     |
| Correct, n (%) [95% CI]                                   | 172 (94.0) [89.5, 97.0]        | 1700 (85.1) [83.5, 86.7] | 1872 (85.9) [84.3, 87.3] | 449 (83.6) [80.2, 86.6]   | 163 (95.3) [91.0, 98.0]  | 612 (86.4) [83.7, 88.9] | 2484 (86.0) [84.7, 87.3] |
| Incorrect, n (%)                                          | 11 (6.0)                       | 297 (14.9)               | 308 (14.1)               | 88 (16.4)                 | 8 (4.7)                  | 96 (13.6)               | 404 (14.0)               |
| Weekly PQ, n                                              | 25                             | 181                      | 206                      | 76                        | 58                       | 134                     | 340                      |
| Correct, n (%) [95% CI]                                   | 23 (92.0) [74.0, 99.0]         | 157 (86.7) [80.9, 91.3]  | 180 (87.4) [82.1, 91.6]  | 69 (90.8) [81.9, 96.2]    | 58 (100) [93.8, 100]     | 127 (94.8) [89.5, 97.9] | 307 (90.3) [86.6, 93.2]  |
| Incorrect, n (%)                                          | 2 (8.0)                        | 24 (13.3)                | 26 (12.6)                | 7 (9.2)                   | 0                        | 7 (5.2)                 | 33 (9.7)                 |
| G6PD activity <sup>b</sup>                                |                                |                          |                          |                           |                          |                         |                          |
| Daily PQ, n                                               | 183                            | 1997                     | 2180                     | 537                       | 171                      | 708                     | 2888                     |
| Correct, n (%) [95% CI]                                   | 176 (96.2) [92.3, 98.4]        | 1716 (85.9) [84.3, 87.4] | 1892 (86.8) [85.3, 88.2] | 465 (86.6) [83.4, 89.4]   | 163 (95.3) [91.0, 98.0]  | 628 (88.7) [86.1, 90.9] | 2520 (87.3) [86.0, 88.5] |
| Incorrect/unknown, n (%)                                  | 7 (3.8)                        | 281 (14.1)               | 288 (13.2)               | 72 (13.4)                 | 8 (4.7)                  | 80 (11.3)               | 368 (12.7)               |
| Weekly PQ, n                                              | 25                             | 181                      | 206                      | 76                        | 58                       | 134                     | 340                      |
| Correct, n (%) [95% CI]                                   | 24 (96.0) [79.6, 99.9]         | 159 (87.8) [82.2, 92.2]  | 183 (88.8) [83.7, 92.8]  | 70 (92.1) [83.6, 97.0]    | 58 (100) [93.8, 100]     | 128 (95.5) [90.5, 98.3] | 311 (91.5) [88.0, 94.2]  |
| Incorrect/unknown, n (%)                                  | 1 (4.0)                        | 22 (12.2)                | 23 (11.2)                | 6 (7.9)                   | 0                        | 6 (4.5)                 | 29 (8.5)                 |
| Age <sup>c</sup>                                          |                                |                          |                          |                           |                          |                         |                          |
| Correct, n (%) [95% CI]                                   | 208 (100) [98.2, 100]          | 2176 (99.9) [99.7, 100]  | 2384 (99.9) [99.7, 100]  | 612 (99.8) [99.1, 100]    | 229 (100) [98.4, 100]    | 841 (99.9) [99.3, 100]  | 3225 (99.9) [99.7, 100]  |
| Incorrect, n (%)                                          | 0                              | 2 (0.1)                  | 2 (0.1)                  | 1 (0.2)                   | 0                        | 1 (0.1)                 | 3 (0.1)                  |
| Women of childbearing potential <sup>d</sup> , n          |                                |                          |                          |                           |                          |                         |                          |
| Non-breastfeeding (1 <sup>st</sup> month), n (%) [95% CI] | 38 (86.8) [71.9, 95.6]         | 410 (95.6) [93.2, 97.3]  | 443 (94.9) [92.4, 96.7]  | 103 (81.7) [73.9, 88.1]   | 44 (100) [92.0, 100]     | 147 (86.5) [80.4, 91.2] | 590 (92.6) [90.3, 94.5]  |
| Breastfeeding, n (%)                                      | 0                              | 0                        | 0                        | 0                         | 0                        | 0                       | 0                        |
| Unknown breastfeeding, n (%)                              | 5 (13.2)                       | 19 (4.4)                 | 24 (5.1)                 | 23 (18.3)                 | 0                        | 23 (13.5)               | 47 (7.4)                 |
| Non-pregnant, n (%) [95% CI]                              | 38 (100) [90.7, 100]           | 429 (100) [99.1, 100]    | 467 (100) [99.2, 100]    | 126 (100) [97.1, 100]     | 44 (100) [92.0, 100]     | 170 (100) [97.9, 100]   | 637 (100) [99.4, 100]    |
| Pregnant                                                  | 0                              | 0                        | 0                        | 0                         | 0                        | 0                       | 0                        |

<sup>a</sup> Based on normal/intermediate G6PD activity ( $\geq 4.1$  U/g Hb) for daily PQ and deficient G6PD activity ( $< 4.1$  U/g Hb) for weekly PQ, age  $\geq 6$  months, non-breastfeeding (1<sup>st</sup> month), non-pregnant.

<sup>b</sup> Based on normal/intermediate G6PD activity ( $\geq 4.1$  U/g Hb) for daily PQ and deficient G6PD activity ( $< 4.1$  U/g Hb) for weekly PQ.

<sup>c</sup> Based on age  $\geq 6$  months receiving daily or weekly PQ.

<sup>d</sup> Based on female patients aged  $\geq 16$  years to  $< 50$  years. PQ, primaquine.



**Table S12 Baseline socio-demographic and clinical characteristics of patients with mixed *P. vivax/P. falciparum* infections, by treatment group.**

| Characteristic                      | TQ (n=5)    | PQ           |              |              |               | No TQ or PQ (n=4) | Overall (n=49) |
|-------------------------------------|-------------|--------------|--------------|--------------|---------------|-------------------|----------------|
|                                     |             | 7-day (n=34) | 14-day (n=4) | Weekly (n=2) | All PQ (n=40) |                   |                |
| Sex                                 |             |              |              |              |               |                   |                |
| Male                                | 4 (80.0)    | 23 (67.6)    | 4 (100)      | 2 (100)      | 29 (72.5)     | 3 (75.0)          | 36 (73.5)      |
| Female                              | 1 (20.0)    | 11 (32.4)    | 0            | 0            | 11 (27.5)     | 1 (25.0)          | 13 (26.5)      |
| Childbearing potential <sup>a</sup> | 0           | 8 (72.7)     | 0            | 0            | 8 (72.7)      | 1 (100)           | 9 (69.2)       |
| Breastfeeding <sup>b</sup>          |             |              |              |              |               |                   |                |
| Yes                                 | 0           | 1 (12.5)     | 0            | 0            | 1 (12.5)      | 0                 | 1 (11.1)       |
| No                                  | 0           | 7 (87.5)     | 0            | 0            | 7 (87.5)      | 1 (100)           | 8 (88.9)       |
| Pregnant <sup>b</sup>               |             |              |              |              |               |                   |                |
| Yes                                 | 0           | 0            | 0            | 0            | 0             | 1 (100)           | 1 (11.1)       |
| No                                  | 0           | 8 (100)      | 0            | 0            | 8 (100)       | 0                 | 8 (88.9)       |
| Age, years                          | 41.2 (13.1) | 32.9 (17.1)  | 33.8 (12.7)  | 47.5 (6.4)   | 33.7 (16.5)   | 39.5 (20.6)       | 34.9 (16.4)    |
| Ethnicity                           |             |              |              |              |               |                   |                |
| Mixed                               | 5 (100)     | 33 (97.1)    | 4 (100)      | 1 (50.0)     | 38 (95.0)     | 4 (100)           | 47 (95.9)      |
| White                               | 0           | 1 (2.9)      | 0            | 1 (50.0)     | 2 (5.0)       | 0                 | 2 (4.1)        |
| Black                               | 0           | 0            | 0            | 0            | 0             | 0                 | 0              |
| Asian                               | 0           | 0            | 0            | 0            | 0             | 0                 | 0              |
| Indigenous                          | 0           | 0            | 0            | 0            | 0             | 0                 | 0              |
| Age class, years                    |             |              |              |              |               |                   |                |
| Birth to <5                         | 0           | 1 (2.9)      | 0            | 0            | 1 (2.5)       | 0                 | 1 (2.0)        |
| ≥5 to <16                           | 0           | 3 (8.8)      | 0            | 0            | 3 (7.5)       | 0                 | 3 (6.1)        |
| ≥16 to <30                          | 1 (20.0)    | 12 (35.3)    | 1 (25.0)     | 0            | 13 (32.5)     | 2 (50.0)          | 16 (32.7)      |
| ≥30 to <50                          | 2 (40.0)    | 11 (32.4)    | 3 (75.0)     | 1 (50.0)     | 15 (37.5)     | 0                 | 17 (34.7)      |
| ≥50 to <70                          | 2 (40.0)    | 7 (20.6)     | 0            | 1 (50.0)     | 8 (20.0)      | 2 (50.0)          | 12 (24.5)      |
| ≥70                                 | 0           | 0            | 0            | 0            | 0             | 0                 | 0              |
| Weight class, kg                    |             |              |              |              |               |                   |                |
| ≥5 to <50                           | 0           | 5 (14.7)     | 0            | 0            | 5 (12.5)      | 0                 | 5 (10.2)       |
| ≥50 to <70                          | 1 (20.0)    | 11 (32.4)    | 1 (25.0)     | 0            | 12 (30.0)     | 1 (25.0)          | 14 (28.6)      |
| ≥70 to <90                          | 2 (40.0)    | 10 (29.4)    | 2 (50.0)     | 2 (100.0)    | 14 (35.0)     | 3 (75.0)          | 19 (38.8)      |
| ≥90 to <120                         | 0           | 2 (5.9)      | 1 (25.0)     | 0            | 3 (7.5)       | 0                 | 3 (6.1)        |
| ≥120                                | 0           | 0            | 0            | 0            | 0             | 0                 | 0              |
| Missing                             | 2 (40.0)    | 6 (17.6)     | 0            | 0            | 6 (15.0)      | 0                 | 8 (16.3)       |
| Haemoglobin level, g/dL             |             |              |              |              |               |                   |                |
| n                                   | 5           | 31           | 3            | 1            | 35            | 2                 | 42             |
| Mean (SD)                           | 14.1 (2.8)  | 13.4 (3.4)   | 10.5 (5.1)   | 8.9          | 13.0 (3.6)    | 12.2 (2.2)        | 13.1 (3.5)     |
| <7.0 g/dL                           | 0           | 1 (3.2)      | 0            | 0            | 1 (2.9)       | 0                 | 1 (2.4)        |
| Education                           |             |              |              |              |               |                   |                |
| Illiterate                          | 0           | 2 (5.9)      | 0            | 0            | 2 (5.0)       | 0                 | 2 (4.1)        |
| 1st to 5th year                     | 1 (20.0)    | 3 (8.8)      | 1 (25.0)     | 1 (50.0)     | 5 (12.5)      | 0                 | 6 (12.2)       |
| 5th year                            | 0           | 5 (14.7)     | 0            | 0            | 5 (12.5)      | 1 (25.0)          | 6 (12.2)       |
| 6th-9th year                        | 4 (80.0)    | 2 (5.9)      | 2 (50.0)     | 0            | 4 (10.0)      | 0                 | 8 (16.3)       |
| Complete basic education            | 0           | 5 (14.7)     | 0            | 0            | 5 (12.5)      | 1 (25.0)          | 6 (12.2)       |
| Incomplete high school              | 0           | 8 (23.5)     | 0            | 0            | 8 (20.0)      | 1 (25.0)          | 9 (18.4)       |
| Complete high school                | 0           | 5 (14.7)     | 1 (25.0)     | 1 (50.0)     | 7 (17.5)      | 0                 | 7 (14.3)       |
| Incomplete college                  | 0           | 1 (2.9)      | 0            | 0            | 1 (2.5)       | 1 (25.0)          | 2 (4.1)        |
| Complete college                    | 0           | 1 (2.9)      | 0            | 0            | 1 (2.5)       | 0                 | 1 (2.0)        |
| Not applicable                      | 0           | 2 (5.9)      | 0            | 0            | 2 (5.0)       | 0                 | 2 (4.1)        |
| Missing                             | 0           | 0            | 0            | 0            | 0             | 0                 | 0              |
| Occupation                          |             |              |              |              |               |                   |                |
| Agriculture                         | 0           | 2 (5.9)      | 0            | 0            | 2 (5.0)       | 0                 | 2 (4.1)        |
| Livestock                           | 0           | 0            | 0            | 0            | 0             | 0                 | 0              |
| Household                           | 1 (20.0)    | 7 (20.6)     | 2 (50.0)     | 0            | 9 (22.5)      | 0                 | 10 (20.4)      |
| Tourism                             | 1 (20.0)    | 0            | 0            | 0            | 0             | 0                 | 1 (2.0)        |
| Gold digging                        | 0           | 1 (2.9)      | 1 (25.0)     | 0            | 2 (5.0)       | 0                 | 2 (4.1)        |
| Farming                             | 0           | 0            | 0            | 0            | 0             | 0                 | 0              |
| Hunting/fishing                     | 0           | 0            | 0            | 0            | 0             | 0                 | 0              |
| Construction                        | 0           | 0            | 0            | 0            | 0             | 0                 | 0              |
| Mining                              | 0           | 0            | 0            | 0            | 0             | 0                 | 0              |
| Traveller                           | 0           | 1 (2.9)      | 0            | 1 (50.0)     | 2 (5.0)       | 0                 | 2 (4.1)        |
| Other                               | 3 (60.0)    | 22 (64.7)    | 1 (25.0)     | 1 (50.0)     | 24 (60.0)     | 4 (100)           | 31 (63.3)      |
| Missing                             | 0           | 1 (2.9)      | 0            | 0            | 1 (2.6)       | 0                 | 1 (2.0)        |

Data are n (%) and mean (standard deviation).

<sup>a</sup> Denominator for % is the number of females.

<sup>b</sup> Denominator for % is the number of females of childbearing potential (defined as age ≥16 to <50 years).

**Table S13 G6PD testing and G6PD status of patients with mixed infections, by treatment group.**

| Characteristic         | TQ (n=5) | PQ           |              |              |            | No TQ or PQ (n=4) | Overall (n=49) |
|------------------------|----------|--------------|--------------|--------------|------------|-------------------|----------------|
|                        |          | 7-day (n=34) | 14-day (n=4) | Weekly (n=2) | All (n=40) |                   |                |
| G6PD test              |          |              |              |              |            |                   |                |
| No G6PD test result    | 0        | 3 (8.8)      | 1 (25.0)     | 1 (50.0)     | 5 (12.5)   | 2 (50.0)          | 7 (14.3)       |
| G6PD test result       | 5 (100)  | 31 (91.2)    | 3 (75.0)     | 1 (50.0)     | 35 (87.5)  | 2 (50.0)          | 42 (85.7)      |
| G6PD quantitative test | 5 (100)  | 30 (96.8)    | 3 (100)      | 1 (100)      | 34 (97.1)  | 2 (100)           | 41 (97.6)      |
| G6PD patient card      | 0        | 1 (3.2)      | 0            | 0            | 1 (2.9)    | 0                 | 1 (2.4)        |
| G6PD status            |          |              |              |              |            |                   |                |
| Deficient              | 0        | 1 (3.2)      | 0            | 1 (100)      | 2 (5.7)    | 0                 | 2 (4.8)        |
| Intermediate           | 0        | 12 (38.7)    | 0            | 0            | 12 (34.3)  | 1 (50.0)          | 13 (31.0)      |
| Normal                 | 5 (100)  | 18 (58.1)    | 3 (100)      | 0            | 21 (60.0)  | 1 (50.0)          | 27 (64.3)      |

Data are n (%). TQ, tafenoquine, PQ, primaquine.

G6PD status was defined as deficient ( $\leq 4.0$  U/g Hb), intermediate (4.1–6.0 U/g Hb), or normal ( $\geq 6.1$  U/g Hb). G6PD normal represented  $\geq 70\%$  and G6PD deficient  $< 30\%$  of the local population median G6PD activity.

**Table S14 Malaria history of patients with mixed infections, by facility level.**

| Characteristic                                    | Higher/medium-level facilities |                       |             | Lower-level facilities    |                        | Overall (n=49) |             |
|---------------------------------------------------|--------------------------------|-----------------------|-------------|---------------------------|------------------------|----------------|-------------|
|                                                   | Hospitals (n=8)                | Emergency care (n=24) | All (n=32)  | Basic health units (n=17) | Operational base (n=0) |                |             |
| <b>Diagnostic test</b>                            |                                |                       |             |                           |                        |                |             |
| Thick blood smear                                 | 7 (87.5)                       | 24 (100)              | 31 (96.9)   | 15 (88.2)                 | 0                      | 15 (88.2)      | 46 (93.9)   |
| Rapid diagnostic test                             | 1 (12.5)                       | 0                     | 1 (3.1)     | 1 (5.9)                   | 0                      | 1 (5.9)        | 2 (4.1)     |
| Polymerase chain reaction                         | 0                              | 0                     | 0           | 1 (5.9)                   | 0                      | 1 (5.9)        | 1 (2.0)     |
| Parasitaemia, per mm <sup>3</sup>                 | 0                              | 4                     | 4           | 0                         | 0                      | 0              | 4           |
| Mean (SD)                                         | –                              | 11.0 (12.8)           | 11.0 (12.8) | –                         | –                      | –              | 11.0 (12.8) |
| <b>Semi-quantitative parasitaemia<sup>a</sup></b> |                                |                       |             |                           |                        |                |             |
| < half cross                                      | 1 (12.5)                       | 3 (12.5)              | 4 (12.5)    | 5 (29.4)                  | 0                      | 5 (29.4)       | 9 (18.4)    |
| Half cross                                        | 1 (12.5)                       | 0                     | 1 (3.1)     | 1 (5.9)                   | 0                      | 1 (5.9)        | 2 (4.1)     |
| 1 cross                                           | 1 (12.5)                       | 1 (4.2)               | 2 (6.3)     | 1 (5.9)                   | 0                      | 1 (5.9)        | 3 (6.1)     |
| 2 crosses                                         | 1 (12.5)                       | 9 (37.5)              | 10 (31.3)   | 7 (41.2)                  | 0                      | 7 (41.2)       | 17 (34.7)   |
| 3 crosses                                         | 3 (37.5)                       | 10 (41.7)             | 13 (40.6)   | 1 (5.9)                   | 0                      | 1 (5.9)        | 14 (28.6)   |
| 4 crosses                                         | 0                              | 1 (4.2)               | 1 (3.1)     | 0                         | 0                      | 0              | 1 (2.0)     |
| Missing                                           | 1 (12.5)                       | 0                     | 1 (3.1)     | 2 (11.8)                  | 0                      | 2 (11.8)       | 3 (6.1)     |
| <b>Blood transfusion in last 60 days</b>          |                                |                       |             |                           |                        |                |             |
| Yes                                               | 0                              | 0                     | 0           | 0                         | 0                      | 0              | 0           |
| No                                                | 8 (100)                        | 22 (91.7)             | 30 (93.8)   | 16 (94.1)                 | 0                      | 16 (94.1)      | 46 (93.9)   |
| Missing                                           | 0                              | 2 (8.3)               | 2 (6.3)     | 1 (5.9)                   | 0                      | 1 (5.9)        | 3 (6.1)     |
| <b><i>P. falciparum</i> in the last 40 days</b>   |                                |                       |             |                           |                        |                |             |
| Yes                                               | 3 (37.5)                       | 4 (16.7)              | 7 (21.9)    | 1 (5.9)                   | 0                      | 1 (5.9)        | 8 (16.3)    |
| No                                                | 5 (62.5)                       | 20 (83.3)             | 25 (78.1)   | 16 (94.1)                 | 0                      | 16 (94.1)      | 41 (83.7)   |

Data are n (%) or mean (standard deviation). TQ, tafenoquine, PQ, primaquine.

<sup>a</sup> Half-cross (200–300 parasites/mm<sup>3</sup>); 1 cross (301–500 parasites/mm<sup>3</sup>); 2 crosses (501–10,000 parasites/mm<sup>3</sup>); 3 crosses (10,001–100,000 parasites/mm<sup>3</sup>); and 4 crosses (>100,001 parasites/mm<sup>3</sup>).

**Table S15 Pre-treatment haemoglobin levels by treatment group (primary population).**

| Characteristic        | TQ (n=2685)          | PQ                   |                      |                      |                      | No TQ or PQ<br>(n=113) |
|-----------------------|----------------------|----------------------|----------------------|----------------------|----------------------|------------------------|
|                       |                      | 7-day (n=2631)       | 14-day (n=257)       | Weekly (n=340)       | All (n=3228)         |                        |
| Missing test          | 0                    | 254 (9.7)            | 17 (6.6)             | 3 (0.9)              | 274 (8.5)            | 40 (35.4)              |
| Number with test      | 2685 (100)           | 2377 (90.3)          | 240 (93.4)           | 337 (99.1)           | 2954 (91.5)          | 73 (64.6)              |
| Mean (SD), g/dL       | 14.0 (2.5)           | 14.5 (2.8)           | 14.1 (2.9)           | 14.9 (3.6)           | 14.5 (2.9)           | 12.8 (3.1)             |
| Median (Q1, Q3), g/dL | 14.1<br>(12.5, 15.5) | 14.4<br>(12.7, 16.2) | 14.2<br>(12.5, 15.4) | 14.6<br>(12.5, 16.8) | 14.4<br>(12.7, 16.2) | 12.4<br>(10.8, 14.8)   |
| Min, max, g/dL        | 4.0, 24.8            | 4.0, 24.7            | 5.0, 25.0            | 4.0, 24.9            | 4.0, 25.0            | 6.6, 20.9              |
| <7.0 g/dL, n (%)      | 18 (0.7)             | 14 (0.6)             | 3 (1.3)              | 4 (1.2)              | 21 (0.7)             | 3 (4.1)                |

**Table S16 Haemoglobin levels, overall and by facility level and municipality (primary population).**

| Overall                  | High/medium-level facilities |                            |                      | Lower-level facilities       |                             |                      | Overall<br>(n=6026)  |
|--------------------------|------------------------------|----------------------------|----------------------|------------------------------|-----------------------------|----------------------|----------------------|
|                          | Hospital<br>(n=753)          | Emergency<br>care (n=4035) | All (n=4788)         | Basic health<br>unit (n=892) | Operational<br>base (n=346) | All (n=1238)         |                      |
| Number with test         | 741                          | 3811                       | 4552                 | 825                          | 335                         | 1160                 | 5712                 |
| Mean (SD), g/dL          | 13.6 (2.5)                   | 14.3 (2.7)                 | 14.2 (2.7)           | 14.4 (2.9)                   | 14.1 (3.3)                  | 14.3 (3.0)           | 14.2 (2.7)           |
| Median (Q1, Q3),<br>g/dL | 13.8<br>(12.3, 15.3)         | 14.3<br>(12.6, 16.0)       | 14.2<br>(12.6, 15.8) | 14.4<br>(12.7, 16.0)         | 13.8<br>(11.9, 15.5)        | 14.2<br>(12.5, 15.8) | 14.2<br>(12.6, 15.8) |
| Min, max, g/dL           | 4.9, 21.3                    | 4.0, 24.8                  | 4.0, 24.8            | 4.0, 25.0                    | 4.0, 24.9                   | 4.0, 25.0            | 4.0, 25.0            |
| <7.0 g/dL, n (%)         | 9 (1.2)                      | 19 (0.5)                   | 28 (0.6)             | 10 (1.2)                     | 4 (1.2)                     | 14 (1.2)             | 42 (0.7)             |

  

| Manaus                   | High/medium-level facilities |                           |                      | Lower-level facilities       |                             |                      | Overall<br>(n=1840)  |
|--------------------------|------------------------------|---------------------------|----------------------|------------------------------|-----------------------------|----------------------|----------------------|
|                          | Hospital<br>(n=753)          | Emergency<br>care (n=667) | All (n=1420)         | Basic health<br>unit (n=117) | Operational<br>base (n=303) | All (n=420)          |                      |
| Number with test         | 741                          | 581                       | 1322                 | 110                          | 293                         | 403                  | 1725                 |
| Mean (SD), g/dL          | 13.6 (2.5)                   | 14.4 (3.0)                | 14.0 (2.7)           | 14.2 (3.1)                   | 14.1 (3.3)                  | 14.1 (3.3)           | 14.0 (2.9)           |
| Median (Q1, Q3),<br>g/dL | 13.8<br>(12.3, 15.3)         | 14.2<br>(12.5, 16.1)      | 14.0<br>(12.4, 15.5) | 14.3<br>(12.2, 15.8)         | 13.7<br>(12.0, 15.5)        | 13.9<br>(12.1, 15.6) | 14.0<br>(12.3, 15.5) |
| Min, max, g/dL           | 4.9, 21.3                    | 5.2, 24.8                 | 4.9, 24.8            | 4.2, 23.5                    | 4.0, 24.9                   | 4.0, 24.9            | 4.0, 24.9            |
| <7.0 g/dL, n (%)         | 9 (1.2)                      | 2 (0.3)                   | 11 (0.8)             | 2 (1.8)                      | 4 (1.4)                     | 6 (1.5)              | 17 (1.0)             |

  

| Porto Velho              | High/medium-level facilities |                            |                      | Lower-level facilities       |                            |                      | Overall<br>(n=4186)  |
|--------------------------|------------------------------|----------------------------|----------------------|------------------------------|----------------------------|----------------------|----------------------|
|                          | Hospital (n=0)               | Emergency<br>care (n=3368) | All (n=3368)         | Basic health<br>unit (n=775) | Operational<br>base (n=43) | All (n=818)          |                      |
| Number with test         | 0                            | 3230                       | 3230                 | 715                          | 42                         | 757                  | 3987                 |
| Mean (SD), g/dL          | –                            | 14.3 (2.6)                 | 14.3 (2.6)           | 14.4 (2.9)                   | 14.0 (2.9)                 | 14.4 (2.9)           | 14.3 (2.7)           |
| Median (Q1, Q3),<br>g/dL | –                            | 14.3<br>(12.7, 15.9)       | 14.3<br>(12.7, 15.9) | 14.4<br>(12.7, 16.0)         | 14.1<br>(11.6, 15.9)       | 14.4<br>(12.7, 16.0) | 14.3<br>(12.7, 16.0) |
| Min, max, g/dL           | –                            | 4.0, 24.6                  | 4.0, 24.6            | 4.0, 25.0                    | 8.1, 20.4                  | 4.0, 25.0            | 4.0, 25.0            |
| <7.0 g/dL, n (%)         | 0                            | 17 (0.5)                   | 17 (0.5)             | 8 (1.1)                      | 0                          | 8 (1.1)              | 25 (0.6)             |

**Table S17 Day 5 follow-up outcomes (safety population).**

| Outcome                          | TQ         | PQ         |           |            | All        | Overall    |
|----------------------------------|------------|------------|-----------|------------|------------|------------|
|                                  |            | 7-day      | 14-day    | Weekly     |            |            |
| Overall, n                       | 2685       | 2631       | 257       | 340        | 3228       | 5913       |
| Follow-up completed              | 622 (23.2) | 172 (6.5)  | 19 (7.4)  | 24 (7.1)   | 215 (6.7)  | 837 (14.2) |
| Signs of haemolysis <sup>a</sup> |            |            |           |            |            |            |
| Missing                          | 64 (10.3)  | 21 (12.2)  | 2 (10.5)  | 3 (12.5)   | 26 (12.1)  | 90 (10.8)  |
| Yes                              | 56 (9.0)   | 8 (4.7)    | 1 (5.3)   | 0          | 9 (4.2)    | 65 (7.8)   |
| No                               | 502 (80.7) | 143 (83.1) | 16 (84.2) | 21 (87.5)  | 180 (83.7) | 682 (81.5) |
| Manaus, n                        | 921        | 707        | 53        | 113        | 873        | 1794       |
| Follow-up completed              | 253 (27.5) | 72 (10.2)  | 10 (18.9) | 13 (11.5)  | 95 (10.9)  | 348 (19.4) |
| Signs of haemolysis <sup>a</sup> |            |            |           |            |            |            |
| Missing                          | 57 (22.5)  | 15 (20.8)  | 1 (10.0)  | 3 (23.1)   | 19 (20.0)  | 76 (21.8)  |
| Yes                              | 6 (2.4)    | 0          | 1 (10.0)  | 0          | 1 (1.1)    | 7 (2.0)    |
| No                               | 190 (75.1) | 57 (79.2)  | 8 (80.0)  | 10 (76.9)  | 75 (78.9)  | 265 (76.1) |
| Porto Velho, n                   | 1764       | 1,924      | 204       | 227        | 2355       | 4119       |
| Follow-up completed              | 369 (20.9) | 100 (5.2)  | 9 (4.4)   | 11 (4.8)   | 120 (5.1)  | 489 (11.9) |
| Signs of haemolysis <sup>a</sup> |            |            |           |            |            |            |
| Missing                          | 7 (1.9)    | 6 (6.0)    | 1 (11.1)  | 0          | 7 (5.8)    | 14 (2.9)   |
| Yes                              | 50 (13.6)  | 8 (8.0)    | 0         | 0          | 8 (6.7)    | 58 (11.9)  |
| No                               | 312 (84.6) | 86 (86.0)  | 8 (88.9)  | 11 (100.0) | 105 (87.5) | 417 (85.3) |

<sup>a</sup> Calculated for those patients who completed day 5 follow-up.

# Study Protocol

|                         |                                                                                                                                                                                   |
|-------------------------|-----------------------------------------------------------------------------------------------------------------------------------------------------------------------------------|
| <b>Protocol No</b>      | MMV_TQ_18_02                                                                                                                                                                      |
| <b>Products</b>         | Tafenoquine<br>Primaquine                                                                                                                                                         |
| <b>Study Title</b>      | <b>TRUST Study</b><br><b>Operational Feasibility of Appropriate <i>Plasmodium Vivax</i> Radical Cure with Tafenoquine or Primaquine after Quantitative G6PD Testing in Brazil</b> |
| <b>Study Sponsor</b>    | Health Surveillance Secretariat/ Coordination of Zoonoses and Vector Transmission Diseases Surveillance/Ministry of Health, Brazil and Medicines for Malaria Venture              |
| <b>Date of Protocol</b> | 21June2019                                                                                                                                                                        |
| <b>Amendment</b>        | 06Feb2020                                                                                                                                                                         |
| <b>Amendment 2</b>      | 17Jul2020                                                                                                                                                                         |
| <b>Amendment 3</b>      | 12May2021                                                                                                                                                                         |
| <b>Amendment 4</b>      | 23Sep2021                                                                                                                                                                         |

|                               |                                                                                                        |
|-------------------------------|--------------------------------------------------------------------------------------------------------|
| <b>Responsible Parties</b>    |                                                                                                        |
| <i>Principal Investigator</i> | Marcus Lacerda<br> |





## Document History

| Document                    | Date       | Summary of Change                                                                                                                                                                       |
|-----------------------------|------------|-----------------------------------------------------------------------------------------------------------------------------------------------------------------------------------------|
| Protocol V1.0               | 21/06/2019 | Not applicable                                                                                                                                                                          |
| Protocol V2.0               | 27/01/2020 | Modification of wording to clarify the Observational and non-interventional characteristics of the study as CONEP requested.                                                            |
| Protocol V3.0 (Amendment 1) | 06/02/2020 | Addition of a pilot phase in view of delayed availability of tafenoquine                                                                                                                |
|                             | 06/02/2020 | Update of information on approval of tafenoquine by ANVISA                                                                                                                              |
| Protocol V4.0 (Amendment 2) | 17/07/2020 | Removal of pilot phase due to delayed start with Covid-19                                                                                                                               |
|                             |            | Modification of primary endpoint calculation to reflect updated Malaria Treatment Guidelines of Ministry of Health<br><br>Revised timelines for the study due to the COVID-19 pandemic. |
| Protocol V5.0 (Amendment 3) | 25/05/2021 | Revised timelines for the study.                                                                                                                                                        |
| Protocol V6.0 (Amendment 4) | 23/09/2021 | Revised inclusion criteria                                                                                                                                                              |

# Approval

## TRuST study

### Operational Feasibility of Appropriate *Plasmodium vivax* Radical Cure with Tafenoquine or Primaquine After Quantitative G6PD Testing in Brazil

Protocol N° MMV\_TQ\_18\_02 Amendment 4

Version 6

Dated 23 Sep 2021

The signatures of the representatives of Doctor Heitor Vieira Dourado Tropical Medicine Foundation (the principal investigator) and Medicines for Malaria Venture (MMV) below constitute their approval of this protocol and provide the necessary assurances that this study will be conducted in compliance with Good Pharmacoepidemiology Practice (GPP) guidelines, the ethical principles arising from the Declaration of Helsinki revised in 2013 and all current local regulations.

#### For Doctor Heitor Vieira Dourado Tropical Medicine Foundation

*Dr Marcus Vinivius Guimarães de Lacerda*  
*MD, Principal Investigator*

Signature



Date 24/09/2021

#### For the Medicines for Malaria Venture (MMV)

*Dr Stephan Duparc, MD*  
*Chief Medical Officer*

Signature:

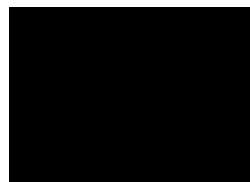

Date: 24/09/2021

## Table of contents

|                                                             |           |
|-------------------------------------------------------------|-----------|
| <b>Document History</b> .....                               | <b>3</b>  |
| <b>Approval</b> .....                                       | <b>4</b>  |
| <b>Table of contents</b> .....                              | <b>5</b>  |
| <b>List of Tables</b> .....                                 | <b>7</b>  |
| <b>List of Figures</b> .....                                | <b>8</b>  |
| <b>1 LIST OF ABBREVIATIONS</b> .....                        | <b>9</b>  |
| <b>2 SYNOPSIS</b> .....                                     | <b>10</b> |
| <b>3 AMENDMENTS AND UPDATES</b> .....                       | <b>14</b> |
| <b>5 BACKGROUND AND RATIONALE</b> .....                     | <b>16</b> |
| <b>5.1 Background</b> .....                                 | <b>16</b> |
| <b>5.2 Study Rationale</b> .....                            | <b>18</b> |
| <b>6 OBJECTIVES AND ENDPOINTS</b> .....                     | <b>19</b> |
| <b>6.1 Objectives</b> .....                                 | <b>19</b> |
| 6.1.1 Primary Objective .....                               | 19        |
| 6.1.2 Secondary Objectives.....                             | 19        |
| <b>6.2 Endpoints</b> .....                                  | <b>19</b> |
| 6.2.1 Primary endpoint .....                                | 19        |
| 6.2.2 Secondary endpoints.....                              | 19        |
| <b>7 HYPOTHESIS</b> .....                                   | <b>20</b> |
| <b>8 STUDY DESIGN</b> .....                                 | <b>21</b> |
| <b>9 STUDY POPULATION</b> .....                             | <b>25</b> |
| <b>9.1 Health Care Facilities</b> .....                     | <b>25</b> |
| <b>9.2 Patients</b> .....                                   | <b>25</b> |
| 9.2.1 Inclusion Criteria .....                              | 25        |
| 9.2.2 Exclusion Criteria.....                               | 25        |
| <b>10 MEDICINAL PRODUCTS AND G6PD DIAGNOSTIC TEST</b> ..... | <b>26</b> |
| <b>11 STUDY ASSESSMENTS</b> .....                           | <b>27</b> |
| <b>11.1 Patient Data</b> .....                              | <b>27</b> |
| <b>11.2 Cost Data</b> .....                                 | <b>28</b> |

|              |                                                                      |           |
|--------------|----------------------------------------------------------------------|-----------|
| <b>12</b>    | <b>SAFETY REPORTING</b> .....                                        | <b>29</b> |
| <b>13</b>    | <b>STATISTICAL METHODS</b> .....                                     | <b>30</b> |
| <b>13.1</b>  | <b>Study Size</b> .....                                              | <b>30</b> |
| <b>13.2</b>  | <b>Statistical Analyses</b> .....                                    | <b>31</b> |
| 13.2.1       | General Considerations.....                                          | 31        |
| 13.2.2       | Analyzed Populations.....                                            | 31        |
| 13.2.3       | Data Analysis.....                                                   | 31        |
| 13.2.4       | Interim Analyses.....                                                | 32        |
| 13.2.5       | Final Analyses.....                                                  | 32        |
| <b>13.3</b>  | <b>Bias of the Study</b> .....                                       | <b>33</b> |
| 13.3.1       | Selection Bias.....                                                  | 33        |
| 13.3.2       | Information Bias.....                                                | 33        |
| 13.3.3       | Confounding Bias.....                                                | 33        |
| <b>14</b>    | <b>DATA HANDLING</b> .....                                           | <b>34</b> |
| <b>15</b>    | <b>ETHICAL CONDUCT OF THE STUDY</b> .....                            | <b>35</b> |
| <b>15.1</b>  | <b>Ethical Considerations</b> .....                                  | <b>35</b> |
| <b>15.2</b>  | <b>Institutional Review Board/Independent Ethics Committee</b> ..... | <b>35</b> |
| <b>15.3</b>  | <b>Independent Study Oversight Committee</b> .....                   | <b>35</b> |
| <b>15.4</b>  | <b>Benefits</b> .....                                                | <b>35</b> |
| <b>15.5</b>  | <b>Risks</b>                                                         | <b>36</b> |
| <b>15.6</b>  | <b>Informed Consent</b> .....                                        | <b>36</b> |
| <b>15.7</b>  | <b>Data Protection</b> .....                                         | <b>38</b> |
| <b>15.8</b>  | <b>Adherence to the Protocol</b> .....                               | <b>38</b> |
| <b>15.9</b>  | <b>Protocol Amendment</b> .....                                      | <b>38</b> |
| <b>15.10</b> | <b>Retention of Patient Records</b> .....                            | <b>38</b> |
| <b>15.11</b> | <b>Confidentiality</b> .....                                         | <b>38</b> |
| <b>16</b>    | <b>PLANS FOR DISSEMINATING AND COMMUNICATING STUDYREPORT</b> .....   | <b>39</b> |
| <b>17</b>    | <b>REFERENCES</b> .....                                              | <b>40</b> |

## List of Tables

|         |                                                                                                                      |    |
|---------|----------------------------------------------------------------------------------------------------------------------|----|
| Table 1 | Study Milestones and Timelines .....                                                                                 | 15 |
| Table 2 | Precision and 95%CI obtained for percentages from 80% to 99% with study sizes of 400, 500, 1000, 2000 and 5000 ..... | 30 |

## List of Figures

|                            |    |
|----------------------------|----|
| Figure 1: Study Flow ..... | 24 |
|----------------------------|----|

# 1 LIST OF ABBREVIATIONS

| <b>Abbreviation</b> | <b>Definition</b>                                 |
|---------------------|---------------------------------------------------|
| AHA                 | Acute hemolytic anemia                            |
| ANVISA              | Brazilian health regulatory agency                |
| CI                  | Confidence interval                               |
| CQ                  | Chloroquine                                       |
| CRF                 | Case report form                                  |
| CRO                 | Contract research organization                    |
| EC                  | Ethics committee                                  |
| e-CRF               | Electronic case report form                       |
| FDA                 | Food and Drug Administration                      |
| FMT-HVD             | Tropical Medicine Foundation Doctor Heitor Vieira |
| G6PD                | Glucose-6-phosphate dehydrogenase                 |
| GPP                 | Good pharmacoepidemiology practice                |
| HCP                 | Health care provider                              |
| ICF                 | Informed consent form                             |
| ICH                 | International conference on harmonization         |
| IEC                 | Independent ethics committee                      |
| IRB                 | Institutional review board                        |
| ISOC                | Independent Study oversight committee             |
| ISPE                | International society for pharmacoepidemiology    |
| MAH                 | Marketing authorization holder                    |
| NMCP                | National malaria control programme                |
| P. vivax            | Plasmodium vivax                                  |
| PI                  | Principal investigator                            |
| PQ                  | Primaquine                                        |
| SAP                 | Statistical analysis plan                         |
| SIVEP-Malaria       | Epidemiological surveillance system for malaria   |
| TLS                 | Transport layer security                          |
| TQ                  | Tafenoquine                                       |
| WHO                 | World Health Organization                         |

## 2 SYNOPSIS

|                        |                                                                                                                                                                                                                                                                                                                                                                                                                                                                                                                                                                                                                                                                                                                                                                                                                                                                                                                                                                                                                                                                                                                                                                                                                                                                                                                                                                                                                                                                                                                                                                                                          |
|------------------------|----------------------------------------------------------------------------------------------------------------------------------------------------------------------------------------------------------------------------------------------------------------------------------------------------------------------------------------------------------------------------------------------------------------------------------------------------------------------------------------------------------------------------------------------------------------------------------------------------------------------------------------------------------------------------------------------------------------------------------------------------------------------------------------------------------------------------------------------------------------------------------------------------------------------------------------------------------------------------------------------------------------------------------------------------------------------------------------------------------------------------------------------------------------------------------------------------------------------------------------------------------------------------------------------------------------------------------------------------------------------------------------------------------------------------------------------------------------------------------------------------------------------------------------------------------------------------------------------------------|
| <b>Title</b>           | <b>Operational Feasibility of Appropriate <i>Plasmodium Vivax</i> Radical Cure with Tafenoquine or Primaquine after Quantitative G6PD Testing in Brazil</b>                                                                                                                                                                                                                                                                                                                                                                                                                                                                                                                                                                                                                                                                                                                                                                                                                                                                                                                                                                                                                                                                                                                                                                                                                                                                                                                                                                                                                                              |
| <b>Protocol number</b> | MMV_TQ_18_02                                                                                                                                                                                                                                                                                                                                                                                                                                                                                                                                                                                                                                                                                                                                                                                                                                                                                                                                                                                                                                                                                                                                                                                                                                                                                                                                                                                                                                                                                                                                                                                             |
| <b>Objectives</b>      | <p><u>Primary objective</u></p> <p>To investigate whether <i>Plasmodium vivax</i> (<i>P. vivax</i>) patients ≥16 years are treated with tafenoquine (TQ) in accordance with the appropriate level of glucose-6-phosphate dehydrogenase (G6PD) enzyme activity.</p> <p><u>Secondary objectives</u></p> <ul style="list-style-type: none"> <li>- To investigate whether <i>P. vivax</i> patients ≥6 months are treated with primaquine (PQ) in accordance with the appropriate level of G6PD enzyme activity.</li> <li>- To describe the characteristics of patients treated with TQ or PQ.</li> <li>- To measure frequency of drug-induced acute hemolytic anemia (AHA) and hospitalization due to drug-induced AHA.</li> </ul>                                                                                                                                                                                                                                                                                                                                                                                                                                                                                                                                                                                                                                                                                                                                                                                                                                                                           |
| <b>Study Endpoints</b> | <p><u>Primary endpoint</u></p> <ul style="list-style-type: none"> <li>- Percentage of <i>P. vivax</i> patients^ aged ≥16 years treated or not with TQ in accordance with the appropriate level of G6PD enzyme activity:<br/>Among patients aged ≥16 years^:</li> </ul> $\frac{\text{Appropriate use of TQ}^* + \text{Appropriate non-use of TQ}^{**}}{\text{Total use of TQ}^{***} + \text{Appropriate non-use of TQ}^{**}}$ <p>^ excluding those who were treated for <i>P. vivax</i> malaria in the last 60 days<br/>* Number of patients with ≥70% G6PD activity treated with TQ<br/>** Number of patients with &lt;70% G6PD activity not treated with TQ<br/>*** Number of patients treated with TQ</p> <p><u>Secondary endpoints</u></p> <ul style="list-style-type: none"> <li>- Percentage of <i>P. vivax</i> patients aged ≥6 months treated or not with daily PQ in accordance with the appropriate level of G6PD enzyme activity:<br/>Among patients aged ≥6 months:</li> </ul> $\frac{\text{Appropriate use of daily PQ}^* + \text{Appropriate non-use of daily PQ}^{**}}{\text{Total use of PQ}^{***} + \text{Appropriate non-use of daily PQ}^{**}}$ <p>* Number of patients with ≥30% G6PD activity treated with daily PQ<br/>** Number of patients with &lt;30% G6PD activity not treated with daily PQ<br/>*** Number of patients treated with daily PQ</p> <ul style="list-style-type: none"> <li>- Description of the characteristics of patients treated with TQ or with PQ</li> <li>- Frequency of confirmed drug-induced AHA and hospitalization due to drug-induced AHA</li> </ul> |



**Study Design**

This is a non-interventional, observational study conducted in Brazil in patients with *P. vivax* malaria. The study will be conducted in the municipalities of Manaus (Amazonas State) and Porto Velho (Rondônia State).

G6PD tests and TQ will be supplied to health care facilities by the Municipal Health Authorities using the usual supply route for drugs and diagnostics. PQ and other anti-malarial drugs are already available in Brazil.

Designated personnel at health care facilities will be trained on the quantitative G6PD test procedure and the radical cure treatment algorithm by the Principal Investigator (PI) staff and the municipality authorities using educational materials developed by the sponsor in collaboration with the Brazilian Ministry of Health (National Malaria Control Programme [NMCP]) (intended for roll-out during scale-up of TQ introduction).

The design is based on secondary use of data collected routinely for all patients with malaria in the Epidemiological Surveillance System for Malaria (SIVEP-Malaria) by the Brazilian NMCP. Data from all patients with malaria are routinely collected in the SIVEP form by health care providers (HCPs) and entered in the SIVEP database by the municipality staff.

In accordance with the NMCP, the SIVEP form has been adapted to collect information about G6PD testing, TQ treatment and signs of hemolysis. Within the study period, and on a regular basis, retrospective data from all patients will be entered into a new database, the study database, by the municipality staff. Relevant data will be automatically exported, on a weekly basis, to the SIVEP database. The project staff will only have access to de-identified data in line with the access rights that will be attributed to them in the system. Only municipal staff will have access to identified patient data.

In addition to the data collected from the SIVEP forms, PI staff will request the 2 referral hospitals likely to see all hospitalizations for AHA to regularly screen electronic admission records for patients presenting signs of AHA (renal failure, jaundice, blood transfusion, malaria). All identified cases will be investigated using hospital records and SIVEP forms. Information about confirmed drug-induced AHA will be linked with the patient record in the study database. PI staff will also contribute to pharmacovigilance training. Physicians at higher-level health facilities will report side effects through the official Brazilian health regulatory agency (ANVISA) VigiMed system.

Finally, the additional costs of implementing G6PD testing and TQ will be collected alongside the study in the health care facilities.

As the study is based on retrospective data collection, G6PD testing and treatment of patients with TQ or PQ will be conducted in line with the treatment policy i.e., independent from the study.

The study will be conducted in a phased manner:

- 1<sup>st</sup> phase (approximately 3 months): Training and provision of G6PD tests and TQ will be initially limited to the 10 high and medium-level health facilities (referral hospitals, hospitals, emergency care units, polyclinics) involved in the pilot phase. Data will be collected for *P. vivax* malaria patients managed at these health care facilities.

An interim analysis will be conducted after data from 600 *P. vivax* patients ≥16 years who have not been treated for *P. vivax* malaria in the last 60 days are collected in the study database, in order to decide whether the study could be extended to lower-level health facilities. The decision will be made by a Independent Study Oversight Committee (ISOC).

|                                   |                                                                                                                                                                                                                                                                                                                                                                                                                                                                                                                                                                                                                                                                                                                                                                                                                                                                                                                                                                                                                                                                                                                                                                                                                                                                                                                                                                                                                                                                                                                                                         |
|-----------------------------------|---------------------------------------------------------------------------------------------------------------------------------------------------------------------------------------------------------------------------------------------------------------------------------------------------------------------------------------------------------------------------------------------------------------------------------------------------------------------------------------------------------------------------------------------------------------------------------------------------------------------------------------------------------------------------------------------------------------------------------------------------------------------------------------------------------------------------------------------------------------------------------------------------------------------------------------------------------------------------------------------------------------------------------------------------------------------------------------------------------------------------------------------------------------------------------------------------------------------------------------------------------------------------------------------------------------------------------------------------------------------------------------------------------------------------------------------------------------------------------------------------------------------------------------------------------|
|                                   | <p>If the interim results of the 1<sup>st</sup> phase are deemed unsatisfactory, the ISOC may decide to not extend the study to lower-level health facilities until improvements are made in the educational programme and/or additional HCP support is implemented. Additional interim analyses may be conducted as appropriate.</p> <p>- 2<sup>nd</sup> phase (approximately 9 months): if approved by the ISOC, the study will be extended to lower-level health facilities (basic health units, basic family health units and primary care) and to additional high and medium-level health facilities. After training of the staff, G6PD tests and TQ will be supplied to these healthcare facilities by the municipal health authorities.</p> <p>During this 2<sup>nd</sup> phase, data will continue to be collected for <i>P. vivax</i> patients managed by the higher-level health facilities of the 1<sup>st</sup> phase.</p> <ul style="list-style-type: none"> <li>• An additional interim analysis will be conducted after data from 600 <i>P. vivax</i> patients ≥16 years who have not been treated for <i>P. vivax</i> malaria in the last 60 days from lower-level facilities are collected in the study database (approximately 3 months after the beginning of the 2<sup>nd</sup> phase).</li> </ul> <p>The study will continue while interim analyses are being conducted.<br/>Final results will be reviewed and validated by the ISOC.<br/>It is anticipated that it will take approximately 15-months to carry out the study.</p> |
| <b>Health care facilities</b>     | <p>The study will be conducted in the municipalities of Manaus and Porto Velho.</p> <p>1<sup>st</sup> phase: data will be collected for <i>P. vivax</i> patients managed at approximately 10 high and medium-level health facilities (referral hospitals, hospitals, emergency care units, polyclinics).</p> <p>2<sup>nd</sup> phase (if approved by the ISOC): data will be collected for <i>P. vivax</i> patients managed at approximately 100 lower-level health facilities (basic health units, basic family health units and primary care that are less than 24h away from emergency care) and approximately 10 additional high and medium-level health facilities.</p> <p>During the 2<sup>nd</sup> phase, data will continue to be collected for patients managed in high and medium-level health facilities of the 1<sup>st</sup> phase.</p>                                                                                                                                                                                                                                                                                                                                                                                                                                                                                                                                                                                                                                                                                                    |
| <b>Number of Patients</b>         | <p>It is anticipated that data from approximately 16,000 patients will be included in the study database over the 1-year study duration (approximately 10,000 patients from high and medium-level health facilities and approximately 6,000 patients from lower-level health facilities). Due to the retrospective study design and de-identified nature of data reviewed by the study team, and thus the very low risk attributed to the study for patients, patient informed consent for secondary use of their data will be recorded by the HCP in the SIVEP form.</p>                                                                                                                                                                                                                                                                                                                                                                                                                                                                                                                                                                                                                                                                                                                                                                                                                                                                                                                                                                               |
| <b>Patient Selection Criteria</b> | <p><b>Inclusion criteria</b></p> <p>A patient who has consented/assented must meet the following criteria to be eligible for the study:</p> <ul style="list-style-type: none"> <li>- Diagnosed with mono-species <i>P. vivax</i> malaria (parasitologically confirmed through microscopy or rapid diagnostic test) and older than 6 months of age.</li> <li>- Diagnosed with <i>P. vivax</i> / <i>P. falciparum</i> malaria mixed infection (parasitologically confirmed through microscopy or rapid diagnostic test) and older than 6 months of age.</li> <li>- Diagnosed negative for <i>P. vivax</i> mono-species malaria or <i>P. vivax</i> / <i>P. falciparum</i> malaria mixed infection but had a positive diagnosis in the past.</li> </ul> <p><b>Exclusion criteria</b></p> <p>None.</p>                                                                                                                                                                                                                                                                                                                                                                                                                                                                                                                                                                                                                                                                                                                                                       |

|                                                |                                                                                                                                                                                                                                                                                                                                                                                                                                                                                                                                                                                                                                                                                                                                                                                      |
|------------------------------------------------|--------------------------------------------------------------------------------------------------------------------------------------------------------------------------------------------------------------------------------------------------------------------------------------------------------------------------------------------------------------------------------------------------------------------------------------------------------------------------------------------------------------------------------------------------------------------------------------------------------------------------------------------------------------------------------------------------------------------------------------------------------------------------------------|
| <p><b>Statistical Methods</b></p>              | <p>A detailed Statistical Analysis Plan will be developed and validated before database lock.</p> <p>Statistical analyses will be carried out using SAS software version 9.4 or higher.</p> <p>Analysis will be purely descriptive (no tests performed).</p> <p>Continuous variables will be described by their mean, standard deviation, median, quartiles 1 and 3, extreme values (minimum and maximum) and the number of missing data.</p> <p>Categorical variables will be described by the total and percentage of each response and the number of missing data. Missing data will not be included in the calculation of percentages.</p> <p>95% confidence intervals will be provided when relevant.</p> <p>Only de-identified data will be used for statistical analyses.</p> |
| <p><b>Planned study period (estimates)</b></p> | <p>Start of 1<sup>st</sup> Phase data collection (high and medium-level facilities only): July 2021; First interim analysis: September 2021</p> <p>Start of data collection (lower-level facilities and additional high and medium-level facilities): October 2021</p> <p>Second interim analysis: January 2022</p> <p>End of data collection: July 2022</p> <p>Final analysis: September 2022</p> <p>Final study report: January 2023</p>                                                                                                                                                                                                                                                                                                                                           |

### 3 AMENDMENTS AND UPDATES

#### Amendment 1:

Although the TQ has been approved by the National Health Regulatory Agency (ANVISA) on October 29, 2019, the company holding the marketing authorization needs to complete post-regulatory approval steps such as drug pricing and adapted packaging. It is estimated that TQ is only available in the cities of Manaus and Porto Velho by May 2020.

In view of this delay, the Ministry of Health and public managers of the municipalities plan to start the pilot with a phase that will involve the use of the G6PD test before prescribing radical cure with primaquine (PQ), as recommended by the World Health Organization (WHO). Moreover, in the revised malaria treatment guidelines of the Brazilian Ministry of Health issued in December 2019, G6PD testing before primaquine radical cure is mandatory at health facilities that have the equipment to do so.

The pilot phase will allow the health services to refine the training approach, training materials, patient counselling etc. and learning from the experience with the introduction of G6PD testing for subsequent phases. The pilot phase will be limited to the 10 higher level health units selected for the first phase of the TRUST implementation. All health professionals at these units will be trained by professionals from the State Central Laboratory (LACEN) and State Health Department in both cities, Manaus and Porto Velho. After training, these 10 health units will conduct G6PD tests before prescribing the use of primaquine.

#### Update:

The Ministry of Health has updated the SIVEP system to include the additional variables (including G6PD activity, Hb level, TQ as a treatment option, Day 5 follow-up, weight) in the TRUST study. In view of this, the data entry will be done exclusively by the municipal staff into the SIVEP database. There is no need for an additional data entry system as originally envisaged.

Tafenoquine has been registered by ANVISA in October 2019.

The number of patients was increased as a new phase of data collection was included in the project. It is estimated that approximately 2,000 patients, treated in the 10 high and medium complexity units, will be included in this phase.

#### Amendment 2:

**Removal of pilot phase:** With the delayed start of TRuST due to Covid-19, the issue regarding the availability of TQ has been resolved. In view of this, the study will start with the 1<sup>st</sup> phase in line with the original protocol and there is no longer a need for a pilot phase.

**Revised definition for primary endpoint:** The revised malaria treatment guidelines issued by the Ministry of Health in 2020, specify that patients who have been treated for *P. vivax* malaria in the last 60 days should be treated with a different treatment regimen (Blood stage treatment: Artemether-Lumefantrine; Liver stage treatment: 14-days course of primaquine 0.5mg/kg). NB: In the past, all *P. vivax* patients were treated with 3-day chloroquine + 7 days primaquine (0.5 mg/kg). In view of this the primary endpoint will exclude all *P. vivax* malaria patients who have been treated for *P. vivax* malaria in the last 60 days.

**Revised timeline:** Study start date: October 2020.

**Amendment 3:** Timeline revised. Study start date: July 2021.

**Amendment 4:** Inclusion criteria revised.

## 4 STUDY MILESTONES AND TIMELINES

The planned study milestones and timelines are described in the table below.

**Table 1 Study Milestones and Timelines**

| <b>Milestone</b>                                                                                    | <b>Estimated Date</b> |
|-----------------------------------------------------------------------------------------------------|-----------------------|
| Ethics submission                                                                                   | July 2019             |
| Ethics Approval                                                                                     | November 2019         |
| Submission of notification                                                                          | January 2020          |
| Submission of amendment 2                                                                           | July 2020             |
| Ethics approval                                                                                     | August 2020           |
| Submission of amended protocol amendment 3                                                          | June 2021             |
| Ethics approval                                                                                     | June 2021             |
| Start of data collection (higher and medium-level facilities only)                                  | July 2021             |
| First interim analysis                                                                              | September 2021        |
| Start of data collection (lower-level facilities and additional higher and medium-level facilities) | October 2021          |
| Second interim analysis                                                                             | January 2022          |
| End of data collection                                                                              | July 2022             |
| Final analysis                                                                                      | September 2022        |
| Final study report                                                                                  | February 2023         |

## 5 BACKGROUND AND RATIONALE

### 5.1 Background

Malaria is a major health problem in many countries of the world. Of the five parasite species that cause malaria in humans, *Plasmodium vivax* (*P. vivax*) is the second most common one, after *P. falciparum*, and has the largest geographic distribution (1). World Health Organization (WHO) estimates place the global *P. vivax* malaria burden at 7.5 million cases in 2017 (2).

Treatment strategies and malaria control are generally more effective against *P. falciparum* than *P. vivax*. Incidence of *P. falciparum* often declines faster, whereas *P. vivax* is generally slower to respond (3).

In Brazil, although the absolute incidence of malaria decreased in recent years, *P. vivax* has become the predominant malaria-causing species, with approximately 170,000 new cases in 2017 (2, 4).

*P. vivax* infection is characterized by the persistence of latent parasites (liver-stage hypnozoites), which cause recurrent malaria episodes months or even years after the initial infection (5). WHO's guidelines for the complete treatment of *P. vivax* malaria (radical cure) recommend treatment of the blood stage infection (causing the symptoms of the disease) and of the latent liver stage to achieve clinical cure, and to prevent relapses, onward transmission and progression to severe disease (6).

Chloroquine (CQ) is the most widely used treatment of the blood stage infection. Currently, primaquine (PQ) is the only therapy widely available for treating hepatic stages.

The main safety concern with PQ is the high risk of acute hemolytic anemia (AHA) in individuals with glucose-6-phosphate dehydrogenase (G6PD) deficiency (G6PD enzyme activity <30% of normal) (7).

G6PD deficiency is a common hereditary red blood cell disorder with an overall prevalence across malaria-endemic countries of 8.0% (interquartile range, 7.4–8.8), corresponding to approximately 350 million affected individuals. In Brazil, the prevalence of G6PD deficiency has been estimated at 4.8% (interquartile range, 3.6–6.5) (8).

More than 185 clinically relevant variants of G6PD deficiency have been reported causing a wide range of biochemical and clinical phenotypes (9). As the G6PD gene is located on the X-chromosome, males can be either deficient (hemizygotes) or normal, whereas females can be fully (homozygotes) or partially (heterozygotes) deficient, or normal. Heterozygous females have both G6PD normal and G6PD deficient red blood cells. However, because random X-inactivation (lyonisation) occurs early in embryogenesis, the ratio of deficient to normal red blood cells is highly variable between heterozygous females (10).

The risk of hemolysis after exposure to PQ depends on the dose of PQ and the degree of G6PD enzyme activity. As a result, hemolysis can be negligible and self-limited in individuals with milder deficiencies or result in potentially fatal AHA in individuals with less than 10% of normal enzyme activity (7, 11).

In order to reduce the risk of severe hemolysis, the WHO malaria treatment guidelines recommend that PQ is administered over 14 days (2). However, adherence to this prolonged regimen is frequently challenging. Since patients become rapidly asymptomatic after treatment with CQ, they often fail to complete PQ treatment (7, 12, 13). In Brazil, the recommended PQ dosing regimen for *P. vivax* is PQ 3.5 mg/kg for 7 or 14 days, in combination with CQ 25 mg/kg for 3 days. The 7-day regimen is recommended in endemic regions to ensure higher adherence with the radical cure treatment (4).

Tafenoquine (TQ) is a slowly eliminated primaquine analogue with a longer half-life (~2 weeks), allowing for a single dose regimen to provide radical cure (in combination with 3-day CQ treatment) (14, 15). This simplified dosing regimen may be a significant advance in improving the adherence issues associated with PQ and thereby improving regimen effectiveness in real-life settings.

Clinical efficacy of TQ for *P. vivax* radical cure was assessed in a seamless phase 2b and phase 3 study. Part 1 of the DETECTIVE study (Dose and Efficacy Trial Evaluating Chloroquine and Tafenoquine In Vivax Elimination) was a phase 2b, multicenter, double-blind, randomized, placebo-controlled, dose-selection study, which evaluated TQ efficacy in preventing relapse at 6 months. Patients were treated with CQ on Days 1 to 3, followed by either a single dose of TQ (50 mg, 100 mg, 300 mg, or 600 mg), or PQ 15 mg for 14 days, or placebo (54 subjects per treatment arm). Study results showed that the 300 mg dose of TQ was optimal in terms of safety and efficacy. The estimate of recurrence-free efficacy at 6 months was significantly greater in the 300 mg TQ+CQ group (89.2% [95% Confidence Interval (CI): 77%, 95%]) than in the CQ alone group (37.5% [95% CI: 23%, 52%]) (16).

Part 2 of the DETECTIVE study was a phase 3 study (NCT01376167) and aimed to investigate TQ efficacy of the TQ/CQ dose selected in the phase 2b study. Patients were treated with CQ on Days 1 to 3, followed by either a single dose of TQ 300 mg on Days 1 or 2, or PQ 15 mg for 14 days, or placebo. A total of 522 subjects were included in a 2:1:1 ratio. Treatment with TQ+CQ resulted in a significantly greater recurrence-free efficacy at 6 months (62.4% [95% CI: 55%, 69%]) compared with CQ alone (27.7% [95% CI: 20%, 36%]). In the TQ+CQ group, the risk of recurrence over 6 months was significantly reduced by 70.1% (95% CI: 59.6%, 77.8%) compared with CQ alone (17).

A second supportive phase 3 safety and efficacy study (NCT02216123) called GATHER (Global Assessment of Tafenoquine Hemolytic Risk) aimed to investigate the safety TQ/CQ versus PQ/CQ using a protocol-defined hemoglobin decrease (>3.0 g/dL or ≥30% from baseline, or to an absolute value <6.0 g/dL). Patients were treated with CQ on Days 1 to 3, followed by the randomized treatment (300 mg single dose TQ or 15 mg PQ once daily for 14 days) and matching placebo. A total of 251 patients were included in a 2:1 ratio. In this study, TQ+CQ and PQ+CQ treatments showed a comparable efficacy in all measures, including the recurrence-free efficacy at 6 months (18).

Like PQ, TQ can potentially cause drug-induced AHA in G6PD-deficient patients (19). To manage the hemolysis risk, G6PD testing must be performed before TQ initiation. TQ use must be restricted to individuals whose G6PD enzyme activity is ≥70% of normal. DETECTIVE studies, which included only patients with G6PD enzyme activity ≥70%, showed that the mean decrease in hemoglobin was 0.6% (95% CI: -8.9%, 4.4%) a week after TQ+CQ treatment, compared with 2.2% (95% CI: -6.4, 2.1) after CQ alone and 1.4% (95% CI: -5.9, 0.8) after CQ+PQ (16).

In the GATHER study the incidence of clinically relevant hemolysis was low and similar in both treatment groups in patients with G6PD enzyme activity ≥70% (2.41% for patients receiving TQ+CQ vs. 1.18% for patients receiving PQ+CQ, estimated mean difference: 1.23% [95% CI: -4.16%, 4.98%]). The majority of hemoglobin drops in both treatment groups were low (<2.0 g/dL) and of no clinical concern. No subjects required a blood transfusion. Only 1 subject in the TQ treatment group experienced a hemoglobin nadir <8.0 g/dL, corresponding to a hemoglobin drop of 20 g/dL from Baseline to Day 3 that normalized without specific medical intervention.

Additionally, aforementioned clinical trials showed that TQ was well tolerated with no evidence of increased adverse events compared with the other treatment groups and a favorable benefit: risk profile in adults and adolescents ≥16 years with G6PD levels ≥70% of normal (16).

## 5.2 Study Rationale

TQ has been approved by the US-Food and Drug Administration (FDA) and the Australian Therapeutics Goods Administration. TQ has been approved for use in Brazil, by the Brazilian Health Regulatory Agency (ANVISA). The municipalities of Manaus (Amazonas state) and Porto Velho (Rondônia state), with the recommendation of the Ministry of Health, through the Department of Immunization and Communicable Diseases (DEIDT), will officially adopt the use of quantitative G6PD tests before the radical cure of *P. vivax* (PQ or TQ) and TQ as the first choice treatment for radical cure of *P. vivax* in patients  $\geq 16$  years after the G6PD test. The study will only begin when the new protocol is adopted by the municipalities mentioned and the tafenoquine is approved by ANVISA.

Like PQ, TQ presents a risk of hemolysis when given to G6PD deficient patients. Current labeling mandates that TQ must only be administered to patients with  $\geq 70\%$  G6PD enzymatic activity. A robust, portable, quantitative point-of-care G6PD diagnostic has been developed by SD Biosensor to support the use of TQ and needs to be deployed with TQ. The SDB quantitative G6PD test has been approved for use in Brazil by ANVISA. However, the appropriate and systematic use of G6PD testing within the health system in order to identify patients at risk and the complexity of the treatment algorithm (based on G6PD enzymatic activity and patient age) will be important barriers to well-tolerated and effective radical treatment of *P. vivax* malaria and a significant challenge for malaria control programs.

The present study is designed to investigate the ability of health care facilities in these municipalities to systematically conduct G6PD testing and provide *P. vivax* patients with appropriate radical cure treatment. The key challenge for this operational feasibility study is to ensure that the study will not influence health care providers (HCPs)' drug prescription and overall therapeutic management of patients. Following training on the municipality treatment guidelines, antimalarial treatments and G6PD tests should be prescribed by HCPs in accordance with their clinical judgment and usual standard of care. The introduction of quantitative G6PD testing and TQ could be considered an intervention at the municipality level, however it will be carried out by the MoH. Therefore, the study design itself will be non-interventional and observational, and will be based on retrospective data collection using the routine Epidemiological Surveillance System for Malaria (SIVEP-Malaria), in order to not unduly influence patients' management and as such, to minimize the risk of bias.

This study will provide the with evidence on the feasibility of providing appropriate *P. vivax* radical cure following G6PD testing, at various levels of the health services, under programmatic conditions. This evidence and the insights gained will be crucial for the NMCP to decide on revisions to national malaria treatment policies in Brazil.



## 6 OBJECTIVES AND ENDPOINTS

### 6.1 Objectives

#### 6.1.1 Primary Objective

The primary objective is to investigate whether *P. vivax* patients ≥16 years are treated with TQ in accordance with the appropriate level of G6PD enzyme activity.

#### 6.1.2 Secondary Objectives

The secondary objectives are:

- To investigate whether *P. vivax* patients ≥6 months are treated with PQ in accordance with the appropriate level of G6PD enzyme activity.
- To describe the characteristics of patients treated with TQ or PQ.
- To measure frequency of drug-induced signs of AHA and hospitalization due to drug-induced AHA.

### 6.2 Endpoints

#### 6.2.1 Primary endpoint

The primary endpoint will be the percentage of *P. vivax* patients aged ≥16 years treated or not with TQ in accordance with the appropriate level of G6PD enzyme activity. The primary endpoint will be calculated as follows:

- Among patients aged ≥16 years<sup>^</sup>:

$$\frac{\text{Appropriate use of TQ}^* + \text{Appropriate non-use of TQ}^{**}}{\text{Total use of TQ}^{***} + \text{Appropriate non-use of TQ}^{**}}$$

<sup>^</sup> excluding those with who were treated for *P. vivax* malaria in the last 60 days<sup>\*\*\*\*</sup>

\* Number of patients with ≥70% G6PD activity treated with TQ

\*\* Number of patients with <70% G6PD activity not treated with TQ

\*\*\* Number of patients treated with TQ

#### 6.2.2 Secondary endpoints

Secondary endpoints will be the following:

- Percentage of *P. vivax* patients aged ≥6 months treated or not with daily PQ in accordance with the appropriate level of G6PD enzyme activity:

Among patients aged ≥6 months:

$$\frac{\text{Appropriate use of daily PQ}^* + \text{Appropriate non-use of daily PQ}^{**}}{\text{Total use of PQ}^{***} + \text{Appropriate non-use of daily PQ}^{**}}$$

\* Number of patients with ≥30% G6PD activity treated with daily PQ

\*\* Number of patients with <30% G6PD activity not treated with daily PQ

\*\*\* Number of patients treated with daily PQ

- Description of the characteristics of patients treated with TQ or with PQ
- Frequency of confirmed drug-induced AHA and hospitalization due to drug-induced AHA

## 7 HYPOTHESIS

The systematic use of a quantitative G6PD test to inform treatment decision ensures that patients receive appropriate treatment based on municipalities' guidelines while also being able to reduce the risk of acute hemolytic anemia associated with the use radical cure drugs in patients with inadequate levels of G6PD enzymatic activity after *P.vivax* malaria diagnosis.

## 8 STUDY DESIGN

This study was designed as a study about an implementation. Studies about implementation requires the involvement of several stakeholders and disciplines to address the complex challenges faced when a tool is put into practice in the health sector. The promotion of collaborative ties between the main stakeholders involved in the generation of policies, program management and research is essential, which is why the present study has the participation of the Federal Government, represented here by the Ministry of Health, through the DEIDT.

Studies about implementation enable to assess contextual factors in the real world, usually not captured by other common research methods. In this sense, these methods provide more solid bases for contextual and evidence-based decision making, leveraging, and making the theoretical effects of the evaluated tools more efficient. In this study design, issues that can only be raised by professionals with a direct link to the target population and who experience the reality of the field, as well as populations' customs and behaviors, are considered in the implementation context. Such questions are included among the variables to be evaluated in this type of study.

Embedded in the real world, the research about implementation is also a powerful tool for capturing and analyzing information in real time, enabling performance assessment, and contributing to the strengthening of health systems, which is particularly important when new intervention tools are integrated in the health systems at the national level. These interventions often work in small-scale pilot studies, but do not live up to expectations when implemented in regional or national strategies or even fail to be transferred from one country to another because of contextual differences.

Studies like the one being suggested here are crucial to improve the understanding of the challenges to be faced when confronting the real world, expanding, and deepening the understanding of these factors and how they impact implementation.

This is a non-interventional, observational study conducted in Brazil on patients with *P. vivax* malaria. The study will be conducted in the municipalities of Manaus (Amazonas State) and Porto Velho (Rondônia State).

Both municipalities will officially define TQ to be the first choice for radical cure of *P. vivax* in patients aged  $\geq 16$  years with *P. vivax*-confirmed malaria, after G6PD testing. As part of treatment policy in the municipalities of Manaus and Porto Velho, patients will be asked to return for a follow-up visit at Day 5 to confirm blood-stage parasite clearance and to detect any signs of AHA.

G6PD tests and TQ will be supplied to health care facilities by the Municipal Health Authorities using the usual supply route for drugs and diagnostics. PQ and other anti-malarial drugs are already available in Brazil.

Designated staff at health care facilities will be trained on the quantitative G6PD test procedure and the radical cure treatment algorithm by the Principal Investigator (PI) staff and the municipality authorities using educational materials developed by the sponsor in collaboration with the Brazilian Ministry of Health (NMCP). These materials are intended for roll-out during scale-up of TQ introduction.

The design of the study is based on secondary use of data collected routinely for all patients with malaria in the SIVEP-Malaria by the NMCP. Information of patients with malaria is routinely collected in the SIVEP forms by HCPs and subsequently entered in the SIVEP database by the municipality staff. In accordance with the NMCP, the SIVEP form has been adapted to collect additional information about G6PD testing, TQ treatment and signs of hemolysis.

Within the study period, and on a regular basis, retrospective data from all patients will be entered into a new, study database by the municipality staff. Relevant data will be automatically exported, on a weekly basis, to the SIVEP database. The project staff will only have access to de-identified data in line with the access rights that will be attributed to them in the system. Only municipal staff will have access to identified patient data.

Although treatment policy will include a follow-up visit at Day 5, a proportion of patients may not return for this follow-up visit. In addition to the data collected from the SIVEP forms, PI staff will request the two referral hospitals likely to see all hospitalizations for AHA to regularly screen hospital electronic admission records for patients presenting signs of AHA (renal failure, jaundice, blood transfusion, malaria). All identified cases will be investigated using hospital records and SIVEP forms. Information about confirmed drug induced AHA will be linked with patient data recorded in the database by the municipality staff. The screening process for AHA cases will be fully described into an AHA screening plan. All AHA cases will be also reported to ANVISA in accordance with national procedures.

Finally, the additional costs of implementing G6PD testing and TQ will be collected alongside the study in the health care facilities (See Section 10.2).

Only de-identified data will be used for statistical analyses. Due to the retrospective and de-identified nature of data reviewed by the study team and the very low risk attributed to the study for patients, patient informed consent, for the secondary use of their data, will be recorded by the HCP in the SIVEP form (See Section 14.4).

As the study is based on retrospective data collection, G6PD testing and treatment of patients with TQ or PQ will be conducted in line with the treatment policy, i.e., independent from the study. Tests and treatments will be prescribed by physicians in accordance with their clinical judgment and the prescribing information for TQ and PQ.

The study will be conducted in a phased manner (Figure 1):

- 1<sup>st</sup> phase (approximately 3 months): Training and provision of G6PD tests and TQ will be initially limited to higher and medium-level health facilities (referral hospitals, hospitals, emergency care units, polyclinics). Data will be collected for *P. vivax* patients managed at these facilities.

An interim analysis will be conducted after data from 600 *P. vivax* patients  $\geq 16$  years are collected in the study database, in order to decide whether the study could be extended to lower-level health facilities. The decision will be made by a Independent Study Oversight Committee (ISOC) based on the results of the interim analysis and any other factors as deemed appropriate (e.g., information on training, stocks and consumption of G6PD readers, test strips, TQ and PQ). The organization and decision criteria of the ISOC will be defined in a charter (See Section 14.3).

If the interim results of the 1<sup>st</sup> phase are deemed unsatisfactory (e.g., difficulty of applying the treatment algorithm, incidence of drug-induced AHA), the ISOC may decide not to extend the study to lower-level health facilities until improvements are made in the education program and/or additional HCP support is implemented. Additional interim analyses may be conducted as appropriate.

- 2<sup>nd</sup> phase (approximately 9 months): If approved by the ISOC, the study will be extended to lower-level health facilities (basic health units, basic family health units and primary care) and to additional higher and medium-level health facilities. After training of the staff, G6PD tests and TQ will be supplied to these health care facilities.

During this 2<sup>nd</sup> phase, data will continue to be collected for *P. vivax* patients managed by the higher and medium-level health facilities of the 1<sup>st</sup> phase.

An additional interim analysis will be conducted after data from 600 *P. vivax* patients  $\geq 16$  years from lower-level facilities are collected in the study database (approximately 3 months after the beginning of the 2<sup>nd</sup> phase).

The study will continue while interim analyses are being conducted.

Final results will be reviewed and validated by the ISOC.

It is anticipated that it will take approximately 15-months to carry out the study.

**Figure 1: TRuST Study Flow**

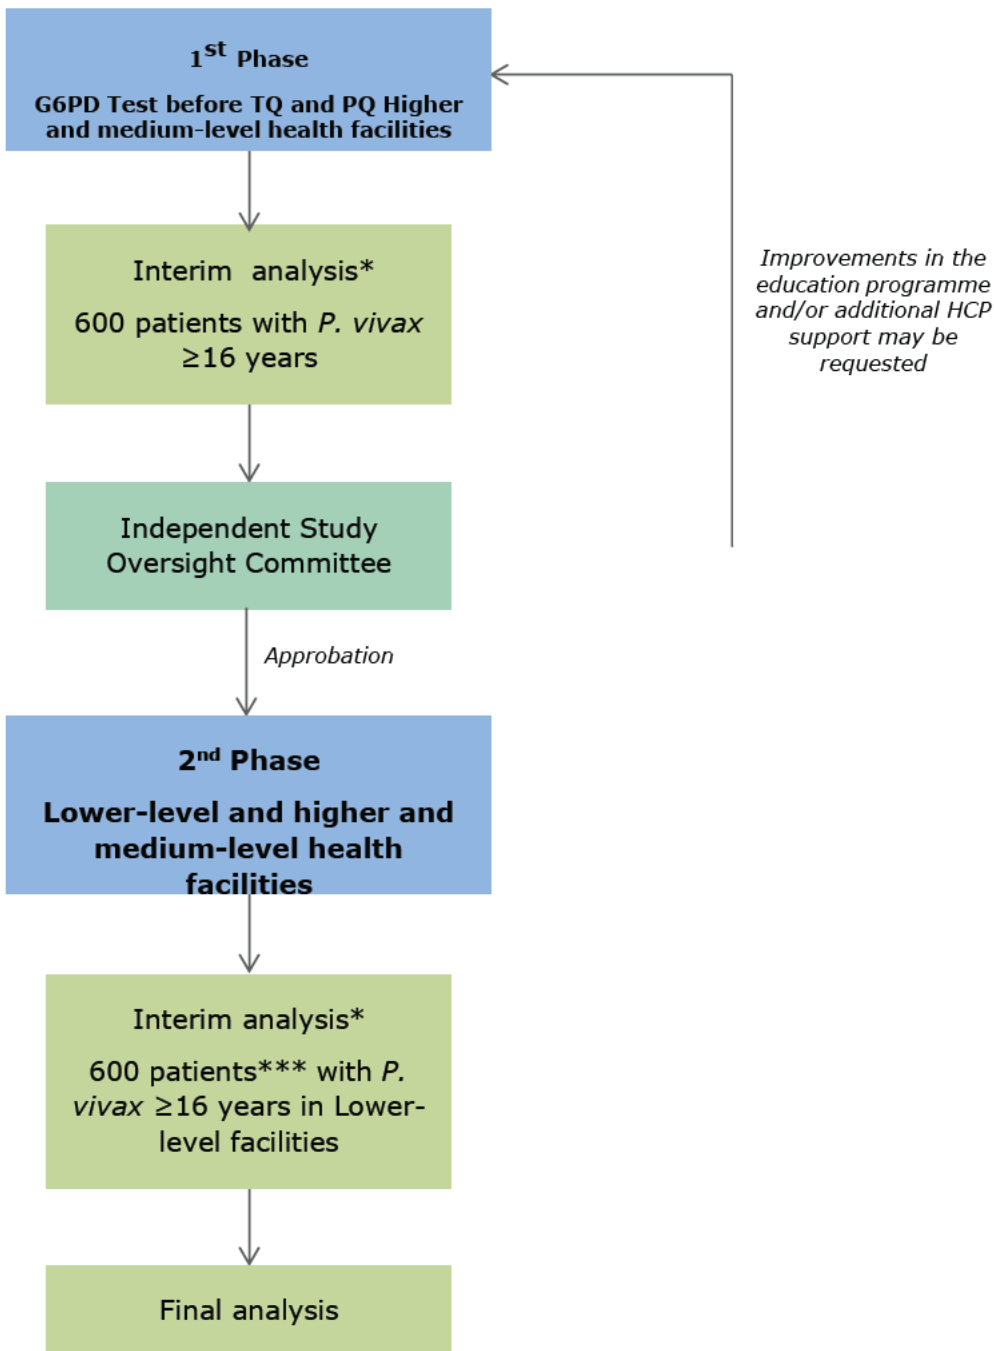

\*While interim analyses are being conducted, the study will continue, and health care facilities will continue to access G6PD testing and TQ

\*\* excluding those who were treated for *P. vivax* malaria in the last 60 day

## 9 STUDY POPULATION

### 9.1 Health Care Facilities

The study will be conducted in Brazil in the municipalities of Manaus (Amazonas State) and Porto Velho (Rondônia State).

The relevant staff at health care facilities will be trained by the PI staff and the municipality authorities using educational materials (intended for roll-out during scale-up of TQ introduction) on the need for and use of G6PD testing, the treatment algorithm based on G6PD activity levels, adverse events of TQ and PQ, identifying, reporting and managing adverse events to ANVISA and surveillance (completion of revised SIVEP form). Training logs will be maintained.

TQ, G6PD readers and test strips will be supplied to health care facilities by the Municipal Health Authorities after staff training is completed.

During the 1<sup>st</sup> phase, the training and provision of TQ and G6PD tests will be limited to the same 10 higher and medium-level health facilities (referral hospitals, hospitals, emergency care units, polyclinics). During the 1<sup>st</sup> phase, data will be collected only for *P. vivax* patients managed at these higher-level health facilities.

If approved by the ISOC, the 2<sup>nd</sup> phase will be initiated in a phased manner and the training and provision of TQ and G6PD tests will be extended to approximately 100 lower-level health facilities (basic health units, basic family health units and primary care that are less than 24h away from emergency care) and the remaining higher and medium-level health facilities. During the 2<sup>nd</sup> phase, data will be collected for *P. vivax* patients managed at these health facilities and will continue to be collected for

*P. vivax* patients managed by the higher and medium-level health facilities of the 1<sup>st</sup> phase.

### 9.2 Patients

#### 9.2.1 Inclusion Criteria

A patient who has consented/assented must meet the following criteria to be eligible for the study:

- Diagnosed with mono-species *P. vivax* malaria (parasitologically confirmed through microscopy or rapid diagnostic test) and older than 6 months of age.
- Diagnosed with *P. vivax* / *P. falciparum* malaria co-infection (parasitologically confirmed through microscopy or rapid diagnostic test) and older than 6 months of age.
- Diagnosed negative for *P. vivax* mono-species malaria or *P. vivax* / *P. falciparum* malaria co-infection but had a positive diagnosis in the past.
- 

#### 9.2.2 Exclusion Criteria

None.

## 10 MEDICINAL PRODUCTS AND G6PD DIAGNOSTIC TEST

Tafenoquine 300 mg single-dose, is an 8-aminoquinoline anti-malarial drug indicated for the radical cure (prevention of relapse) of *P. vivax* malaria. Tafenoquine is supplied as 150 mg tablets.

Primaquine is an 8-aminoquinoline anti-malarial drug indicated for the radical cure (prevention of relapse) of *P. vivax* malaria. Primaquine is supplied as 7.5mg and 15 mg tablets.

The SD Biosensor STANDARD G6PD test is a point-of-care, quantitative glucose-6-phosphate dehydrogenase (G6PD) enzyme activity analyzer. It is a colorimetric test and provides the G6PD activity as a ratio to hemoglobin (U/g Hb). It is a rapid and simple test procedure providing results in 5 minutes. The reader can be held with one hand and is battery-operated for on-site examination. The strips need to be stored at room temperature: 2-30 °C / 36-86°F

The TQ, the SD Biosensor Standard G6PD reader and the strips will be supplied by MMV. These will be distributed to health units through the usual system of supplying medicines and supplies in the municipalities. The distribution will only happen after the TQ is approved by ANVISA and after the teams of the health units are trained in the new treatment protocol. Primaquine and other malaria drugs are already available in Brazil.

Tafenoquine and SD Biosensor Standard G6PD test reader and strips will be supplied by the Tropical Medicine Foundation Doctor Heitor Vieira (FMT-HVD) and CEPEM – Centro de Pesquisa em Medicina Tropical to the Municipal Health Authorities for onward distribution to health care facilities. Primaquine and other anti-malarial drugs are already available in Brazil.



# 11 STUDY ASSESSMENTS

## 11.1 Patient Data

The following data will be retrospectively collected from the SIVEP Form

### Day 1 (initial presentation)

- Patient characteristics
  - Socio-demographics: age and date of birth, gender, ethnicity, principal activity
  - **Weight**
  - Phone number
  - **Consent / assent**
  - Prior malaria infection: *P. vivax* in previous 60 days; *P. falciparum* malaria in previous 40 days
  - Malaria diagnosis: date of first symptoms, diagnostic test (date, type of test, test results), parasitemia
  - Pregnancy status
  - If the woman is breastfeeding for less than 1 month
  - If the patient received a blood transfusion less than 60 days ago
  - **Hemoglobin level**
- **G6PD enzyme activity**
  - **Quantitative G6PD test (test performed or not, date of the test, G6PD test result)**
- Malaria treatment
  - 
  - Treatment administered: anti-malarial drugs administered (*TQ*, *PQ*, *CQ*, other), start date, intended treatment duration
- Clinic characteristics
  - Municipality (name and code)
  - Health facility (name and code)
  - HCP (name and code)

### Day 5 (follow-up visit)

- Safety Assessments
  - Signs of hemolysis (jaundice, dark urine, other)

In case of confirmed drug-induced AHAs detected at the 2 referral hospitals, the following additional data will be collected from patient medical records and HCP training logs, and linked with the data collected in the SIVEP form:

- Time to onset from anti-malarial treatment
- Hemoglobin level
- AHA signs and symptoms
- AHA Treatment
- Hospitalization (hospitalization date, discharge date)
- Outcome
- Training of HCP(s) who performed the G6PD test and provided the anti-malarial treatment (date of training, results of competency assessment)

## **11.2 Cost Data**

The following data about health facilities will be collected:

- Salaries, tax, travel pay for staff members in contact with patient, including any administrative staff
- Additional time needed for G6PD testing and related training and quality assurance
- Consumables (i.e., G6PD test strips, drug costs)
- Equipment costs (i.e., biosensor, motorcycle)

## **12 SAFETY REPORTING**

Confirmed drug-induced AHA and hospitalization due to drug-induced AHA will be captured in the study database.

Due to the retrospective design of the study, the reporting of safety events to the sponsor is not solicited for this study and the submission of suspected adverse drug reactions in the form of individual case safety reports is not required.

All AHA cases collected for the study will be recorded in the study database and summarized in the study report.

HCPs will be encouraged to report all adverse events, including all AHA cases, to ANVISA VigiMed system in accordance with national procedures.

## 13 STATISTICAL METHODS

### 13.1 Study Size

The study size calculation was based on the primary endpoint of the study (percentage of patients with *P. vivax* aged  $\geq 16$  years with  $\geq 70\%$  G6PD activity treated with TQ and with  $<70\%$  G6PD activity not treated with TQ among all patients treated with TQ and patients with  $<70\%$  G6PD activity not treated with TQ). The study size was determined to ensure a satisfactory precision of this percentage.

The precision (e) of the 95% CI of a percentage (i.e., half of the width of the CI) is determined using the following formula:

$$e = 1.96 \times \frac{\sqrt{p(1-p)}}{n}$$

where p is the percentage and n the study size.

The following table presents the precision and the corresponding 2-sided 95% CI for a percentage of patients with *P. vivax* aged  $\geq 16$  years with  $\geq 70\%$  G6PD activity treated with TQ or with  $<70\%$  G6PD activity not treated with TQ varying from 80% to 99% and a study size of 400 to 5000 patients with *P. vivax* treated with TQ or with  $<70\%$  G6PD activity not treated with TQ.

**Table 2 Precision and 95%CI obtained for percentages from 80% to 99% with study sizes of 400, 500, 1000, 2000 and 5000**

| N    | 80%   |           | 90%   |           | 95%   |           | 97.5% |           | 99%   |            |
|------|-------|-----------|-------|-----------|-------|-----------|-------|-----------|-------|------------|
|      | e (%) | 95% CI    | e (%) | 95% CI    | e (%) | 95% CI    | e (%) | 95% CI    | e (%) | 95% CI     |
| 400  | 3.9   | 76.1;83.9 | 2.9   | 87.1;92.9 | 2.1   | 92.9;97.1 | 1.5   | 96.0;99.0 | 1.0   | 98.0;100.0 |
| 500  | 3.5   | 76.5;83.5 | 2.6   | 87.4;92.6 | 1.9   | 93.1;96.9 | 1.4   | 96.1;98.9 | 0.9   | 98.1;99.9  |
| 1000 | 2.5   | 77.5;82.5 | 1.9   | 88.1;91.9 | 1.4   | 93.6;96.4 | 1.0   | 96.5;98.5 | 0.6   | 98.4;99.6  |
| 2000 | 1.8   | 78.2;81.8 | 1.3   | 88.7;91.3 | 1.0   | 94.0;96.0 | 0.7   | 96.8;98.2 | 0.4   | 98.6;99.4  |
| 5000 | 1.1   | 78.9;81.1 | 0.8   | 89.2;90.8 | 0.6   | 94.4;95.6 | 0.4   | 97.1;97.9 | 0.3   | 98.7;99.3  |

e: precision of the 95% CI.

For example, with 500 patients, the 95% CI for a percentage of 97.5% is (96.1%, 98.9%), and the precision 1.4%. With 400 patients, the 95% CI for a percentage of 97.5% is (96.0%, 99.0%), and the precision 1.5%.

#### Interim analyses

For interim analyses, 500 patients were considered appropriate to estimate the primary endpoint with an acceptable precision. Assuming that *P. vivax* patients treated with TQ and patients with  $<70\%$  G6PD activity not treated with TQ will represent approximately 85% of *P. vivax* patients  $\geq 16$  years, interim analyses will be conducted after data from 600 *P. vivax* patients  $\geq 16$  years who have not been treated for *P. vivax* malaria in the last 60 days are collected in the study database to enable an assessment of the primary endpoint based on 500 patients.

#### Overall study size

In 2017, 16,294 and 3,517 *P. vivax* malaria cases were reported in the municipalities of Manaus and Porto Velho, respectively. Overall, 16,000 *P. vivax* patients are expected to be included in the study (approximately 12,000 in higher and medium level health facilities and 6,000 in lower level health facilities). Assuming that *P. vivax* patients  $\geq 16$  years will represent approximately 60% of *P. vivax* patients and

that *P. vivax* patients treated with TQ and *P. vivax* patients with <70% G6PD activity not treated with TQ will represent approximately 85% of *P. vivax* patients  $\geq 16$  years who have not been treated for *P. vivax* malaria in the last 60 days, the primary endpoint will be assessed in approximately 8,000 patients. Only de-identified data will be used for statistical analyses.

## 13.2 Statistical Analyses

A formal statistical analysis plan (SAP) that will provide details of all analyses and presentation of study data will be approved prior to database lock. All analyses will be carried out using SAS<sup>®</sup> version 9.4 or higher (SAS<sup>®</sup> Institute, Cary, NC).

### 13.2.1 General Considerations

Continuous variables will be described by their mean, standard deviation, median, quartiles 1 and 3, extreme values (minimum and maximum) and the number of missing data. Categorical variables will be described by the total and percentage of each response and the number of missing data. Missing data will not be included in the calculation of percentages.

95% CIs will be provided when relevant. Figures will also be performed when appropriate.

Analysis will be purely descriptive (no tests performed).

### 13.2.2 Analyzed Populations

All patients who meet the selection criteria and consent to their de-identified data being used in the study will be considered in the Analysis population.

Analysis will be performed overall and by subgroups (patients treated with TQ / patients treated with PQ, patients from higher and medium-level facilities / patients from lower-level facilities, age classes, pregnant women). Additional subgroups of interest (to be defined prospectively) may also be examined, as deemed appropriate.

### 13.2.3 Data Analysis

#### ***Patient disposition***

A summary of all patients included in the study database, as well as patients of the Analysis Population will be provided (including reasons for exclusion from the Analysis Population).

#### ***Patient characteristics***

Patient characteristics (socio-demographics characteristics, malaria history, malaria diagnosis, pregnancy, hemoglobin levels) will be presented using descriptive summary statistics on the Analysis Population.

#### ***G6PD test***

The number and percentage of *P. vivax* patients tested for G6PD deficiency will be summarized. The distribution of G6PD test results will be described. Among the *P. vivax* patients treated with TQ, the number and percentage of patients with  $\geq 70\%$  G6PD activity, with <70% G6PD activity and with no G6PD test will be described. Among the *P. vivax* patients treated with PQ, the number and percentage of patients with  $\geq 30\%$  G6PD activity, with <30% G6PD activity and with no G6PD test will be described. The corresponding value of the % cut-off for G6PD activity, in U g/Hb (Units of G6PD enzyme activity per gram of Hb) will be established based on the ongoing G6PD test clinical validation studies.

### **Treatments**

Anti-malarial drug administered and intended treatment duration will be presented using descriptive summary statistics.

### **Costs**

Additional costs of implementing G6PD testing and TQ / PQ per *P. vivax* malaria episode by health care provider will be calculated.

### **Primary analyses**

The number and percentage of *P. vivax* patients aged  $\geq 16$  years treated or not with TQ in accordance with the appropriate level of G6PD enzyme activity will be summarized using descriptive statistics for the analysis population and in the subgroups of interest.

### **Secondary analyses**

The number and percentage of *P. vivax* patients aged  $\geq 6$  months treated or not with daily PQ in accordance with the appropriate level of G6PD enzyme activity will be summarized using descriptive statistics for the analysis population and in the subgroups of interest.

Patient characteristics (age, gender, ethnicity, weight, malaria history, malaria diagnosis, hemoglobin, pregnancies, G6PD activity) of patients treated with TQ and of patients treated with PQ will be presented using descriptive statistics.

Confirmed drug-induced AHA will be presented overall, by anti-malarial drug received, and by G6PD test results, using descriptive summary statistics: number and percentage of patients who experienced at least one AHA, number of AHA in total and per patient, hemoglobin level, AHA symptoms, treatments, hospitalizations and outcomes, training of HCP(s) who performed the G6PD test and provided the anti-malarial treatment.

## **13.2.4 Interim Analyses**

A first interim analysis will be conducted after data from 600 *P. vivax* patients  $\geq 16$  years who have not been treated for *P. vivax* malaria in the last 60 days are collected in higher and medium-level health facilities (all patient data collected from higher and medium-level health facilities at the data cut-off will be analyzed).

An additional interim analysis will be conducted after data from 600 *P. vivax* patients  $\geq 16$  years who have not been treated for *P. vivax* malaria in the last 60 days are collected in higher and medium-level facilities (all patient data collected from lower-level health facilities at the data cut-off will be analyzed).

## **13.2.5 Final Analyses**

Based on epidemiological trends, about 16,000 *P. vivax* cases are likely to be diagnosed and treated within the study period and about 8,000 patients are likely to be treated with tafenoquine. A final analysis will be conducted at the end of the study.

## **13.3 Bias of the Study**

Three types of bias are usually considered for this type of study: selection, information, and confounding bias.

### **13.3.1 Selection Bias**

Selection bias is a distortion of evidence or data that arises from the way that the data are collected.

In order to limit bias in the selection of patients, data from all *P. vivax* patients, regardless of treatment, health status, or other considerations will be included in the analysis.

### **13.3.2 Information Bias**

Information bias results from systematic differences in the way data on exposure or outcome are obtained from the various study groups.

This may mean that patients are assigned to the wrong treatment or outcome category, leading to an incorrect estimate of the association between exposure and outcome. This could occur in this study if the information recorded in the revised SIVEP forms is inaccurate and incomplete or if HCPs do not report certain types of events of potential interest because they feel they are not related to the safety of the medication.

Designated personnel will participate in a training program conducted by the PI staff and the municipality authorities that will encourage consistency of process and procedures at the health care facilities and ensure collection of high-quality data in the revised SIVEP form.

### **13.3.3 Confounding Bias**

Confounding bias occurs when the effects of a treatment or the exposition effect of the disease vary by the presence/level of another factor (effect modifier).

Effect modifiers may be countered by using stratification in the statistical analysis: several subgroup analyses will therefore be conducted on the endpoints (See Section 12.2.2).

## 14 DATA HANDLING

All data collected in the context of this study will be stored and evaluated in accordance with regulatory requirements and applicable guidance for electronic records.

During the one-year duration of the study, all the data collected under the protocols established by the Brazilian Ministry of Health, will be entered by the municipal staff in to the updated SIVEP system. The routine data collection and entry process will be respected and identified patient data will only be seen by the municipal staff.

Data will be collected and subsequently entered by the municipal staff into the SIVEP database at three distinct time points:

- On collection of blood for examination (minimal essential information)
- When a positive malaria diagnosis has been made (more extensive information)
- On Day 5, when the patient returns for a follow-up blood examination (information about adverse events).

Once a week, relevant data of patients who consented to share their unidentified data, will be automatically exported from the SIVEP database to the study database. This approach will ensure that patient confidentiality is fully respected as the data is entered by the municipal staff. Moreover, the system settings and access rights, will ensure that identified patient data is only seen by municipal staff. Study staff will only have access to de-identified data. A unique study ID number will be attributed to each patient in the study database. This approach will avoid the need for duplicate entries and also help allow the NCMP to assess the ease of capturing additional information.

The study team will perform weekly quality control of the data in addition to automated checks to detect and flag missing or inconsistent data in the study database. In the event of missing or inconsistent data, queries will be issued and managed by the PI staff in collaboration with the municipality staff.

Only authorized personnel will have access to the study database. Information security is guaranteed by Transport Layer Security (TLS) protocols.

Hospital admissions due to hemolytic anemia will be linked with the patient's corresponding SIVEP forms using an algorithm based on probabilistic linkage with the support of the relevant municipal staff.

Specific processes for quality control and data management throughout the study will be documented in the Data Management Plan and relevant SOPs.

Data review meetings will be conducted before interim and final analyses in order to review the data collected in the study database. After the study database is declared clean and is released to the statistician, a final copy of the database will be stored by the sponsor.



## **15 ETHICAL CONDUCT OF THE STUDY**

### **15.1 Ethical Considerations**

The study will be conducted in compliance with International Society for Pharmacoepidemiology Good Pharmacoepidemiology Practice (ISPE GPP) guidelines<sup>20</sup>, the ethical principles arising from the Declaration of Helsinki revised in 2013<sup>21</sup> and all current local regulations.

Study personnel involved in conducting this study will be qualified by education, training, and experience to perform their respective task(s).

This study will not use the services of study personnel where sanctions have been invoked or where there has been scientific misconduct or fraud (e.g., loss of medical licensure, debarment).

### **15.2 Institutional Review Board/Independent Ethics Committee**

This study is non-interventional. The drug used to treat the patients is based on clinical judgment alone, and, as such, does not come under applicable laws and regulation on clinical trials. No specific examinations or laboratory tests are to be performed above and beyond those usually undertaken by the physician, and no additional visits are required for study purposes.

A written and dated approval/favorable opinion from the relevant IRB/IEC for the protocol and any relevant supporting information will be obtained before study initiation. The sponsor should provide the relevant IRB/IEC with reports, updates and other information (e.g., amendments and administrative letters) according to regulatory requirements or institution procedures.

### **15.3 Independent Study Oversight Committee**

The role of the Independent Study Oversight Committee will be to provide guidance on study procedures, review and validate study results (interim and final) and recommend on or against an extension of the study to lower-level health facilities.

The Independent Study Oversight Committee will be constituted of the Ministry of Health, selected local country Key Opinion Leaders and experts. This committee will meet at regular, pre-defined time-points.

To ensure independence and transparency, committee members who have any commercial, financial or institutional interest in any outcome of the study may only participate in Committee meetings as invited specialists. Specialists may participate in discussions but cannot be involved in the decision-making process.

The roles, responsibilities, procedures and decision criteria of the Study Oversight Committee will be defined in a charter.

### **15.4 Benefits**

From the patients' perspective, participation in the study is voluntary. Patients who consent to the inclusion of their data in the study will not benefit directly and will not receive any payment for participating. However, their anonymized data will contribute to the evidence base that will support the Ministry of Health to improve Brazilian treatment guidelines for vivax malaria. This will enable Brazilian patients to receive more effective and appropriate treatment.

From a public health perspective, the study should also result in a reduced risk of relapses and incidence of vivax. This leads to a reduction in transmission benefiting the general population in the

regions most affected by the disease. Also, the health professionals involved in the study will receive training by a specialized team including on how to perform a G6PD test, use the test results to select the most appropriate treatment, counsel patients and detect signs and symptoms of hemolysis. After the trainings, health professionals will be better able to provide services of higher quality. Moreover, patients with G6PD deficiency can be accurately diagnosed at any level of the health service, which may prevent health problems caused by the inadvertent prescription of primaquine and tafenoquine.

## 15.5 Risks

The main risk involved in TRuST is the unintentional disclosure of identifiable patient data. In order to minimize this risk, information that can identify the patient will be pseudonymized and researchers will be reminded to ensure non-violation, protection, integrity, confidentiality, and privacy of data. Patients will be guaranteed that their information will be not used in a moral, social, cultural, economic or financial way to jeopardize them. Professionals involved in entering the data in the database will be reminded of the importance to keep the confidentiality of the data and not to use the information for purposes other than TRuST. Moreover, only medical records from patients with diagnostic of malaria *P.vivax* that reported AHA symptoms will be consulted, exclusively during the time the study is in place, and just to collect information that is relevant for TRuST. Also, the integrity of all documents will be respected.

In addition, there may be interference in the routine of health professionals. To mitigate this, the study will carefully plan and conduct the training activities at different times and in smaller classes to minimize any disruption on the provision of health services.

Health professionals and researchers involved will be reminded to respect the cultural, social, moral, religious and ethical values, as well as the habits and customs of the participants, and will commit themselves to ensure that there is no conflict of interest between the researcher and the participants or sponsor of the project.

## 15.6 Informed Consent

Considering TRuST is aiming to evaluate, in real life conditions, the feasibility of adopting new tools to treat *P. vivax* malaria approved by ANVISA, the use of a traditional written informed consent/assent form (WICF) can introduce bias to the study results. Moreover, the risks associated with TRuST procedures are low and the potential for participants to be harmed is unlikely. As advised by CONEP, the National Ethics Committee in Brazil, patients will be informed about the study details, including its risks and benefits, and will be explicitly asked for permission to use their de-identified data for the analysis. Patient decision will be recorded in the SIVEP form.

HCP will explain the TRuST study to the patient (following confirmation of vivax malaria) using a leaflet and a comic book. The HCP will focus, in particular, on the reason for the G6PD test, the treatment algorithm, how the data will be used and the reason for the study.

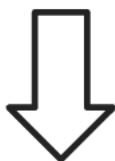

HCP to record the patient's decision (yes/no) in the SIVEP form to have their data analyzed.

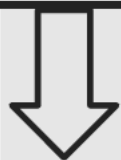

Patient will be given a comic book explaining the treatment tools, the study, and with contact details of study personnel in case of further questions (e.g. withdraw of consent).

## **15.7 Data Protection**

Patients' personal data and investigator's personal data shall be treated in anonymity, complying with the Brazilian local applicable data protection laws and regulations.

Patient names or other information (i.e., date of birth) that identifies them will not be available for the study staff for analysis purposes. Patient data will be coded and rendered indirectly identifiable (de-identified) using unique study ID number in the study database.

## **15.8 Adherence to the Protocol**

The study must be conducted as described in the approved protocol, except for an emergency situation in which proper care for the safety of the patient requires intervention. Any significant deviation from the protocol must be reported immediately to the sponsor and to the relevant IRB/IEC.

## **15.9 Protocol Amendment**

Any change to this protocol will be documented in a protocol amendment, issued by the sponsor.

Amendments will be submitted for consideration to the approving IRB/IECs and/or Regulatory Authority, as applicable.

## **15.10 Retention of Patient Records**

The Sponsor will maintain the data collected (study database) for at least 5 years.

## **15.11 Confidentiality**

The information in this and related documents from the study sponsor includes trade secrets and commercial information that are confidential and may not be disclosed, unless such disclosure is required by national or other laws or regulations. In any event, persons to whom the information is disclosed must be informed that the information is confidential and may not be further disclosed by them.

Individual patient medical information obtained as a result of this study is considered confidential, and disclosure to third parties, other than those noted below, is prohibited. Such medical information may be given to the patient's personal physician or to other appropriate medical personnel responsible for the patient's welfare.

Data generated as a result of this study are to be available for inspection on request of the sponsor, the sponsor's representatives, the relevant IRB/IEC, or regulatory agency.

## **16 PLANS FOR DISSEMINATING AND COMMUNICATING STUDY REPORT**

This study is intended for publication, even if terminated prematurely. Publications may include any or all the following: posting of a synopsis online, abstracts and/or presentations at scientific conferences, or publications of full manuscripts.

Authorship credit will follow the guidelines established by the International Committee of Medical Journals Editors<sup>22</sup> and, as such, should be based on the following criteria 1) substantial contributions to the conception or design of the work; or the acquisition, analysis, or interpretation of data for the work; 2) drafting the work or revising it critically for important intellectual content; 3) final approval of the version to be published and 4) agreement to be accountable for all aspects of the work in ensuring that questions related to the accuracy or integrity of any part of the work are appropriately investigated and resolved. All authors must meet all above criteria. Although publication planning may begin before conducting the study, final decisions on authorship and the order of authors' names will be made based on participation and actual contributions to the study and writing, as discussed above.

## 17 REFERENCES

1. Gething PW, Elyazar IR, Moyes CL, Smith DL, Battle KE, Guerra CA, et al. A long neglected world malaria map: *Plasmodium vivax* endemicity in 2010. *PLoS neglected tropical diseases*. 2012;6(9):e1814.
2. WHO. World Malaria Report 2018. Geneva: World Health Organization, 2018.
3. Howes RE, Battle KE, Mendis KN, Smith DL, Cibulskis RE, Baird JK, et al. Global Epidemiology of *Plasmodium vivax*. *The American journal of tropical medicine and hygiene*. 2016;95(6\_Suppl):15-34.
4. Siqueira AM, Mesones-Lapouble O, Marchesini P, Sampaio VS, Brasil P, Tauil PL, et al. *Plasmodium vivax* Landscape in Brazil: Scenario and Challenges. *The American journal of tropical medicine and hygiene*. 2016;95(6 Suppl):87-96.
5. Imwong M, Snounou G, Pukrittayakamee S, Tanomsing N, Kim JR, Nandy A, et al. Relapses of *Plasmodium vivax* infection usually result from activation of heterologous hypnozoites. *The Journal of infectious diseases*. 2007;195(7):927-33.
6. WHO. Control and elimination of *plasmodium vivax* malaria. A technical brief. World Health Organization, 2015.
7. John GK, Douglas NM, von Seidlein L, Nosten F, Baird JK, White NJ, et al. Primaquine radical cure of *Plasmodium vivax*: a critical review of the literature. *Malaria journal*. 2012;11(1):280.
8. Howes RE, Piel FB, Patil AP, Nyangiri OA, Gething PW, Dewi M, et al. G6PD deficiency prevalence and estimates of affected populations in malaria endemic countries: a geostatistical model-based map. *PLoS medicine*. 2012;9(11):e1001339.
9. Minucci A, Moradkhani K, Hwang MJ, Zuppi C, Giardina B, Capoluongo E. Glucose-6-phosphate dehydrogenase (G6PD) mutations database: review of the "old" and update of the new mutations. *Blood Cells Mol Dis*. 2012;48(3):154-65.
10. Cappellini MD, Fiorelli G. Glucose-6-phosphate dehydrogenase deficiency. *Lancet (London, England)*. 2008;371(9606):64-74.
11. Ashley EA, Recht J, White NJ. Primaquine: the risks and the benefits. *Malaria journal*. 2014;13:418.
12. Galappaththy GNL, Tharyan P, Kirubakaran R. Primaquine for preventing relapse in people with *Plasmodium vivax* malaria treated with chloroquine. *Cochrane Database of Systematic Reviews*. 2013(10).
13. Douglas NM, Poespoprodjo JR, Patriani D, Malloy MJ, Kenangalem E, Sugiarto P, et al. Unsupervised primaquine for the treatment of *Plasmodium vivax* malaria relapses in southern Papua: A hospital-based cohort study. 2017;14(8):e1002379.
14. Rajapakse S, Rodrigo C, Fernando SD. Tafenoquine for preventing relapse in people with *Plasmodium vivax* malaria. *The Cochrane database of systematic reviews*. 2015(4):Cd010458.
15. Ebstie YA, Abay SM, Tadesse WT, Ejigu DA. Tafenoquine and its potential in the treatment and relapse prevention of *Plasmodium vivax* malaria: the evidence to date. *Drug design, development and therapy*. 2016;10:2387-99.
16. Llanos-Cuentas A, Lacerda MV, Rueangweerayut R, Krudsood S, Gupta SK, Kochar SK, et al. Tafenoquine plus chloroquine for the treatment and relapse prevention of *Plasmodium vivax* malaria (DETECTIVE): a multicentre, double-blind, randomised, phase 2b dose-selection study. *Lancet (London, England)*. 2014;383(9922):1049-58.

17. Lacerda MVG, A. L-C, Krudsood S, Lon C, Saunders DL, Mohammed R, et al. Single-dose Tafenoquine for Relapse Prevention in Plasmodium vivax Malaria. NEJM, in press.
18. Llanos-Cuentas A, Lacerda MVG, Hien TT, Vélez ID, Namaik-larp C, Chu CS, et al. Tafenoquine vs. Primaquine to prevent relapse in Plasmodium vivax Malaria. NEJM, in press.
19. Rueangweerayut R, Bancone G, Harrell EJ, Beelen AP, Kongpatanakul S, Mohrle JJ, et al. Hemolytic Potential of Tafenoquine in Female Volunteers Heterozygous for Glucose-6-Phosphate Dehydrogenase (G6PD) Deficiency (G6PD Mahidol Variant) versus G6PD-Normal Volunteers. The American journal of tropical medicine and hygiene. 2017;97(3):702-11.
20. International Society for Pharmacoepidemiology (ISPE). Guidelines for Good Pharmacoepidemiology Practices (GPP). Revised June 2015 [https://www.pharmacoepi.org/resources/guidelines\\_08027.cfm](https://www.pharmacoepi.org/resources/guidelines_08027.cfm)
21. World Medical Association. Declaration of Helsinki. October 2013. <http://www.wma.net/>
22. ICMJE. Recommendations for the Conduct, Reporting, Editing, and Publication of Scholarly Work in Medical Journals. December 2016. <http://www.icmje.org/icmje-recommendations.pdf>

# Statistical Analysis Plan

Protocol number: MMV\_TQ\_18\_02

*TRuST Study*

*Operational Feasibility of Appropriate Plasmodium Vivax Radical Cure with Tafenoquine or Primaquine after Quantitative G6PD Testing in Brazil*

## **SAP for the final analysis**

Prepared by:

ICON plc

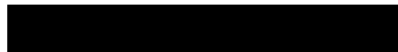

### **SPONSOR:**

**Medicines for Malaria Venture**

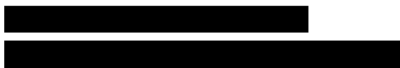

**National Malaria Control Programme /  
Ministry of Health**

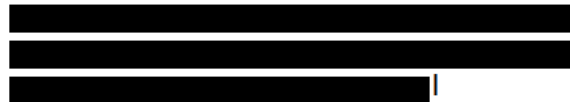

**VERSION: FINAL v3.0**

**DATE: 07 December 2022**

This document is the property of Medicines for Malaria Venture and Health Surveillance Secretariat General of Brazil. Medicines for Malaria Venture and Health Surveillance Secretariat General of Brazil are, jointly, the holders of any and all related intellectual property rights, including, but not limited to, copyrights. This document is confidential. It is not to be copied or distributed to other parties without prior written authorisation from Medicines for Malaria Venture and Health Surveillance Secretariat General of Brazil.

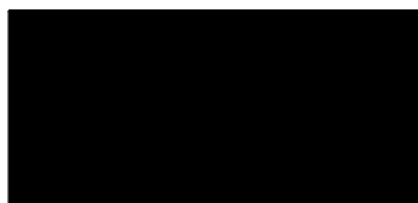



# Statistical Analysis Plan for the final analysis - Approval

## TRuST Study

*Operational Feasibility of Appropriate Plasmodium Vivax Radical Cure with Tafenoquine or Primaquine after Quantitative G6PD Testing in Brazil*

### Protocol:

Number: MMV\_TQ\_18\_02

Version: 6 Amendment 4

Date: 23 September 2021 (including amendment)

### Statistical Analysis Plan

Version: 3.0

Date: 07 December 2022

This Statistical Analysis Plan has been reviewed and approved by the individuals listed below.

| Responsible parties                                                   | Signatures and sign dates (dd-mmm-yyyy)                                              |
|-----------------------------------------------------------------------|--------------------------------------------------------------------------------------|
| Stephan Duparc, Chief Medical Office<br>Medicines for Malaria Venture | 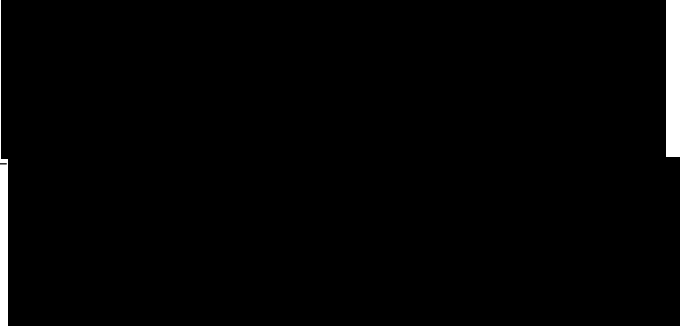 |
| Sally Trufan, Statistical Scientist<br>ICON                           |                                                                                      |

## Table of Contents

|                                                                    |           |
|--------------------------------------------------------------------|-----------|
| <b>STATISTICAL ANALYSIS PLAN FOR THE FINAL ANALYSIS - APPROVAL</b> | <b>2</b>  |
| <b>TABLE OF CONTENTS</b>                                           | <b>3</b>  |
| <b>ABBREVIATIONS</b>                                               | <b>5</b>  |
| <b>1 INTRODUCTION</b>                                              | <b>6</b>  |
| <b>2 STUDY OBJECTIVES</b>                                          | <b>7</b>  |
| 2.1 Primary Objective                                              | 7         |
| 2.2 Secondary Objectives                                           | 7         |
| <b>3 STUDY DESIGN</b>                                              | <b>8</b>  |
| 3.1 Description of the Study Design                                | 8         |
| 3.2 Medical Products                                               | 10        |
| 3.3 G6PD Diagnostic Test                                           | 10        |
| 3.4 Sample Size Rationale                                          | 10        |
| 3.5 Study Population                                               | 11        |
| 3.5.1 Health Care Facilities                                       | 11        |
| 3.5.2 Patients                                                     | 12        |
| 3.6 Endpoints                                                      | 12        |
| 3.6.1 Primary Endpoints                                            | 12        |
| 3.6.2 Secondary Endpoints                                          | 12        |
| <b>4 STUDY VARIABLES</b>                                           | <b>13</b> |
| 4.1 Demographics and Baseline Characteristics                      | 13        |
| 4.2 G6PD Enzyme Activity                                           | 13        |
| 4.3 Malaria Treatments                                             | 13        |
| 4.4 Clinic Characteristics                                         | 14        |
| 4.5 Safety Assessments                                             | 14        |
| <b>5 STATISTICAL METHODOLOGY</b>                                   | <b>16</b> |
| 5.1 General Considerations                                         | 16        |
| 5.1.1 Statistical Rules and Data Formats                           | 16        |
| 5.1.2 Missing Data                                                 | 16        |
| 5.1.3 Outliers                                                     | 16        |
| 5.1.4 Analysis Time Points                                         | 16        |
| 5.1.5 Statistical Software                                         | 17        |
| 5.1.6 Statistical Output                                           | 17        |
| 5.2 Analysis Sets                                                  | 17        |
| 5.3 Subgroups Analyses                                             | 17        |

|            |                                                  |           |
|------------|--------------------------------------------------|-----------|
| <b>5.4</b> | <b>Interim Analyses</b> .....                    | <b>19</b> |
| <b>5.5</b> | <b>Multicenter Study</b> .....                   | <b>19</b> |
| <b>5.6</b> | <b>Analysis Plan</b> .....                       | <b>19</b> |
| 5.6.1      | Patient Disposition .....                        | 19        |
| 5.6.2      | Demographics and Baseline Characteristics .....  | 20        |
| 5.6.3      | G6PD Test and Hemoglobin Level.....              | 21        |
| 5.6.4      | Multiple <i>P. vivax</i> Episodes .....          | 21        |
| 5.6.5      | Malaria Treatments .....                         | 21        |
| 5.6.6      | Primary Analysis: Appropriate Use of TQ .....    | 22        |
| 5.6.7      | Secondary Analyses .....                         | 23        |
| 5.6.8      | Other Safety Analyses .....                      | 25        |
| 5.6.9      | Malaria Follow-up at Day 5.....                  | 26        |
| <b>6</b>   | <b>QUALITY AND VERSION CONTROL</b> .....         | <b>27</b> |
| <b>7</b>   | <b>REFERENCES</b> .....                          | <b>27</b> |
|            | <b>APPENDIX 1: SCHEDULE OF ASSESSMENTS</b> ..... | <b>28</b> |
|            | <b>APPENDIX 2: PLANNED OUTPUT</b> .....          | <b>29</b> |
|            | <b>APPENDIX 3: REVISION HISTORY</b> .....        | <b>33</b> |

## Abbreviations

| Abbreviation    | Definition                                      |
|-----------------|-------------------------------------------------|
| AHA             | Acute Hemolytic Anemia                          |
| AL              | Artemether-lumefrantrine                        |
| ANVISA          | Brazilian health regulatory agency              |
| AS              | Artesunate                                      |
| ASMQ            | Artesunate-mefloquine                           |
| CI              | Confidence Interval                             |
| CQ              | Chloroquine                                     |
| FMT             | Tropical Medicine Foundation                    |
| G6PD            | Glucose-6-Phosphate Dehydrogenase               |
| HCF             | Health Care Facilities                          |
| HCP             | Health Care Provider                            |
| ICF             | Informed Consent Form                           |
| Max             | Maximum                                         |
| Min             | Minimum                                         |
| NMCP            | National Malaria Control Programme              |
| <i>P. vivax</i> | <i>Plasmodium vivax</i>                         |
| PCR             | Polymerase chain reaction                       |
| PDF             | Portable Document Format                        |
| PQ              | Primaquine                                      |
| RDT             | Rapid Diagnostic Test                           |
| SAP             | Statistical Analysis Plan                       |
| SE              | Standard Error                                  |
| SD              | Standard Deviation                              |
| SIVEP-Malaria   | Epidemiological surveillance system for malaria |
| SOC             | System Organ Class                              |
| TFL             | Tables, Figures, and Listings                   |
| TQ              | Tafenoquine                                     |

# 1 INTRODUCTION

This statistical analysis plan (SAP) is intended to provide a detailed description of the planned analyses for the National Malaria Control Programme/Ministry of Health, Brazil, and Medicines for Malaria Venture (MMV), Protocol MMV\_TQ\_18\_02, version 6, 23 September 2021 entitled "Operational Feasibility of Appropriate *Plasmodium Vivax* Radical Cure with Tafenoquine or Primaquine after Quantitative G6PD Testing in Brazil (TRuST Study)".

The first interim analysis for Phase 1 (described in Section 3.1 below) took place in November 2021, and was performed under SAP version 1.0. The second interim analysis for Phase 2 took place in September 2022 and was performed under SAP version 1.2. The final analysis for this study will be conducted using this SAP, version 3.0.

Currently, primaquine (PQ) is the only therapy widely available for treating hepatic stages of malaria with the high risk of acute hemolytic anemia (AHA) in individuals with glucose-6-phosphate dehydrogenase (G6PD) deficiency (G6PD enzyme activity <30% of normal).

Tafenoquine (TQ) is a slowly eliminated primaquine analogue with a longer half-life (~2 weeks), allowing for a single dose regimen to provide radical cure (in combination with 3-day chloroquine (CQ) treatment) [1, 2]. This simplified dosing regimen may be a significant advance in improving the adherence issues associated with PQ and thereby improving regimen effectiveness in real-life settings.

TQ has been approved for use in Brazil, by the Brazilian Health Regulatory Agency (ANVISA). The municipalities of Manaus (Amazonas State) and Porto Velho (Rondônia State) will officially recommend the use of quantitative G6PD testing before *P. vivax* radical cure (PQ or TQ) and TQ as first-choice treatment for *P. vivax* radical cure in patients with normal G6PD enzyme activity, aged ≥16, after G6PD testing.

The present study is designed to investigate the ability of health care facilities (HCFs) in these municipalities to systematically conduct G6PD testing and provide *P. vivax* patients with appropriate radical cure treatment. Following training on the municipality treatment guidelines, antimalarial treatments and G6PD tests should be prescribed by health care providers (HCPs) in accordance with their clinical judgment and usual standard of care.

This study will provide the National Malaria Control Programme (NMCP) with evidence on the operational feasibility of providing appropriate *P. vivax* radical cure following G6PD testing, at various levels of the health services, under programmatic conditions. This evidence and the insights gained will be crucial for the NMCP to decide on revisions to national malaria treatment policies in Brazil.

## 2 STUDY OBJECTIVES

### 2.1 Primary Objective

The primary objective is to investigate whether *P. vivax* patients  $\geq 16$  years are treated with TQ in accordance with the appropriate level of G6PD enzyme activity.

### 2.2 Secondary Objectives

The secondary objectives are:

- To investigate whether *P. vivax* patients  $\geq 6$  months are treated with PQ in accordance with the appropriate level of G6PD enzyme activity.
- To describe the characteristics of patients treated with TQ or PQ.
- To measure frequency of drug-induced signs of AHA and hospitalization due to drug-induced AHA.

## 3 STUDY DESIGN

Key features of the study design are summarized in the sections below; a full description of the study design can be found in the study protocol.

### 3.1 Description of the Study Design

This is a retrospective, non-interventional, observational study conducted in Brazil in the municipalities of Manaus (Amazonas State) and Porto Velho (Rondônia State) on patients with *P. vivax* malaria.

Both municipalities will officially define TQ to be the first choice for radical cure of *P. vivax* in patients with normal G6PD enzyme activity, aged  $\geq 16$  years with *P. vivax*-confirmed malaria, after G6PD testing. As part of treatment policy in the municipalities of Manaus and Porto Velho, patients will be asked to return for a follow-up visit at Day 5 to confirm blood-stage parasite clearance and to detect any signs of AHA.

Designated staff at health care facilities will be trained on the quantitative G6PD test procedure and the radical cure treatment algorithm.

On a regular basis within the study period, routine retrospective data from the SIVEP form (including collection of G6PD testing, TQ treatment, and signs of hemolysis) will be entered into a new study database by the municipality staff for all patients.

As some patients may not return for the follow-up visit at Day 5, principal investigator staff will request the two referral hospitals likely to see all hospitalizations for AHA to regularly screen hospital electronic admission records for patients presenting signs of AHA (renal failure, jaundice, blood transfusion, malaria). Information about confirmed AHA will be linked with patient data recorded in the database by the Tropical Medicine Foundation (FMT) staff.

The study will be conducted in two phases as described in Figure 3-1:

- During the 1<sup>st</sup> phase, data will be collected for *P. vivax* patients managed in higher-level health facilities (see definition Section 3.5.1). Once data from 600 *P. vivax* patients  $\geq 16$  years who have not been treated for *P. vivax* malaria in the last 60 days are collected in the study, an interim analysis will be conducted and the results will be analyzed (as well as other factors) by an Independent Study Oversight Committee in order to recommend whether the study could be extended to lower-level health facilities.

If the interim results of the 1<sup>st</sup> phase are deemed unsatisfactory, the Independent Study Oversight Committee (ISOC) may decide not to recommend an extension of the study to lower-level health facilities until improvements are made in the education program and/or additional HCP support is implemented. Additional interim analyses may be conducted as appropriate.

- During the 2<sup>nd</sup> phase after ISOC approval, and agreement by the sponsors, the study will be extended to lower-level health facilities (see definition Section 3.5.1) and to additional higher-level health facilities.

During this 2<sup>nd</sup> phase, data will continue to be collected for *P. vivax* patients managed by the higher-level health facilities of the 1<sup>st</sup> phase.

An additional interim analysis will be conducted after data from 600 *P. vivax* patients  $\geq 16$  years who have not been treated for *P. vivax* malaria in the last 60 days from lower-level facilities are collected in the study database (approximately 3 months after

the beginning of the 2<sup>nd</sup> phase) to decide whether the study should continue providing services at such facilities or improvements for health service delivery are needed.

The study will continue while interim analyses are being conducted.

Only de-identified data will be used for statistical analyses. Final results will be reviewed by the ISOC.

It is anticipated that it will take approximately 12-months to carry out the study.

**Figure 3-1: TRuST Study Flow**

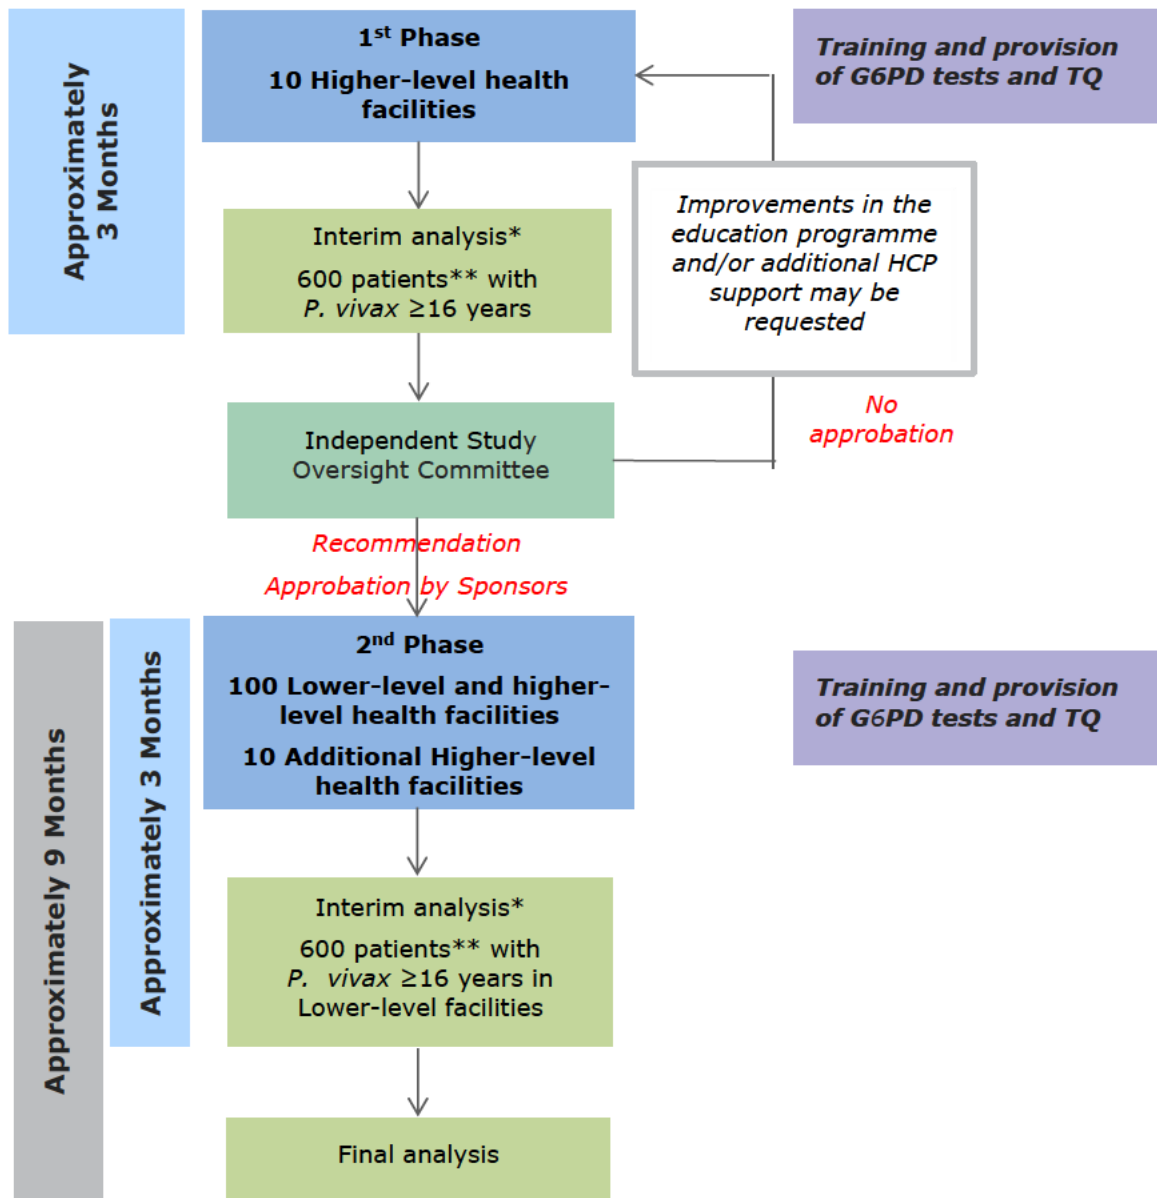

\*While interim analyses are being conducted, the study will continue, and health care facilities will continue to access G6PD testing and TQ

\*\*Excluding patients who were treated for *P. vivax* in the last 60 days



## 3.2 Medical Products

Tafenoquine 300 mg single-dose is an 8-aminoquinoline anti-malarial drug indicated for the radical cure (prevention of relapse) of *P. vivax* malaria. TQ is supplied as 150 mg tablets.

Primaquine is an 8-aminoquinoline anti-malarial drug indicated for the radical cure (prevention of relapse) of *P. vivax* malaria. PQ is supplied as 7.5 mg and 15 mg tablets.

## 3.3 G6PD Diagnostic Test

The SD Biosensor STANDARD™ G6PD test is a point-of-care, quantitative glucose-6-phosphate dehydrogenase (G6PD) enzyme activity analyzer. It is a colorimetric test and provides the G6PD activity as a ratio to hemoglobin (U/g Hb).

## 3.4 Sample Size Rationale

The study size calculation was based on the primary endpoint of the study (percentage of patients with *P. vivax* aged ≥16 years with ≥70% G6PD activity treated with TQ and with <70% G6PD activity not treated with TQ among all patients treated with TQ and patients with <70% G6PD activity not treated with TQ). The study size was determined to ensure a satisfactory precision of this percentage.

The precision (e) of the 95% CI of a percentage (i.e., half of the width of the CI) is determined using the following formula:

$$e = 1.96 \times \sqrt{\frac{p(1-p)}{n}}$$

where *p* is the percentage and *n* the study size.

The following table presents the precision and the corresponding 2-sided 95% CI for a percentage of patients with *P. vivax* aged ≥16 years with ≥70% G6PD activity treated with TQ or with <70% G6PD activity not treated with TQ varying from 80% to 99% and a study size of 400 to 5000 patients with *P. vivax* treated with TQ or with <70% G6PD activity not treated with TQ.

**Table 3-1 Precision and 95% CI obtained for percentages from 80% to 99% with study sizes of 400, 500, 1000, 2000 and 5000**

| N    | Percentage |           |       |           |       |           |       |           |       |            |
|------|------------|-----------|-------|-----------|-------|-----------|-------|-----------|-------|------------|
|      | 80%        |           | 90%   |           | 95%   |           | 97.5% |           | 99%   |            |
|      | e (%)      | 95% CI    | e (%) | 95% CI    | e (%) | 95% CI    | e (%) | 95% CI    | e (%) | 95% CI     |
| 400  | 3.9        | 76.1;83.9 | 2.9   | 87.1;92.9 | 2.1   | 92.9;97.1 | 1.5   | 96.0;99.0 | 1.0   | 98.0;100.0 |
| 500  | 3.5        | 76.5;83.5 | 2.6   | 87.4;92.6 | 1.9   | 93.1;96.9 | 1.4   | 96.1;98.9 | 0.9   | 98.1;99.9  |
| 1000 | 2.5        | 77.5;82.5 | 1.9   | 88.1;91.9 | 1.4   | 93.6;96.4 | 1.0   | 96.5;98.5 | 0.6   | 98.4;99.6  |
| 2000 | 1.8        | 78.2;81.8 | 1.3   | 88.7;91.3 | 1.0   | 94.0;96.0 | 0.7   | 96.8;98.2 | 0.4   | 98.6;99.4  |
| 5000 | 1.1        | 78.9;81.1 | 0.8   | 89.2;90.8 | 0.6   | 94.4;95.6 | 0.4   | 97.1;97.9 | 0.3   | 98.7;99.3  |
| 8000 | 0.7        | 79.3;80.7 | 0.6   | 89.4;90.6 | 0.4   | 94.6;95.4 | 0.3   | 97.2;97.8 | 0.2   | 98.8; 99.2 |

e: precision of the 95% CI.

For example, with 500 patients, the 95% CI for a percentage of 97.5% is (96.1%, 98.9%), and the precision 1.4%. With 400 patients, the 95% CI for a percentage of 97.5% is (96.0%, 99.0%), and the precision 1.5%.

### Interim analyses

For interim analyses, 500 patients were considered appropriate to estimate the primary endpoint with an acceptable precision. Assuming that *P. vivax* patients treated with TQ and patients with <70% G6PD activity not treated with TQ will represent approximately 85% of *P. vivax* patients ≥16 years, interim analyses will be conducted after data from 600 *P. vivax* patients ≥16 years who have not been treated for *P. vivax* malaria in the last 60 days are collected in the study database to enable an assessment of the primary endpoint based on 500 patients.

### Overall study size

In 2017, 16,294 and 3,517 *P. vivax* malaria cases were reported in the municipalities of Manaus and Porto Velho, respectively. Overall, 16,000 *P. vivax* patients are expected to be included in the study (approximately 10,000 in higher-level health facilities and 6,000 in lower-level health facilities). Assuming that *P. vivax* patients ≥16 years will represent approximately 60% of *P. vivax* patients and that *P. vivax* patients treated with TQ and *P. vivax* patients with <70% G6PD activity not treated with TQ will represent approximately 85% of *P. vivax* patients ≥16 years who have not been treated for *P. vivax* malaria in the last 60 days, the primary endpoint was anticipated to be assessed in approximately 8,000 patients. However, due to external circumstances including the COVID-19 pandemic and climate changes that affected malaria transmission during the study time, approximately 6,000 patients will be assessed in the final analysis of the study and the primary endpoint will be assessed in at least 4,000 patients. This will still provide adequate precision for this analysis as shown in Table 3-2. Only de-identified data will be used for statistical analyses.

**Table 3-2: Precision and 95%CI obtained for percentages from 80% to 99% with study size of 4000 patients**

| N    | Percentage |           |       |           |       |           |       |           |
|------|------------|-----------|-------|-----------|-------|-----------|-------|-----------|
|      | 80%        |           | 90%   |           | 95%   |           | 99%   |           |
|      | e (%)      | 95% CI    | e (%) | 95% CI    | e (%) | 95% CI    | e (%) | 95% CI    |
| 4000 | 1.2        | 78.8;81.2 | 0.9   | 89.1;90.9 | 0.7   | 94.3;95.7 | 0.3   | 98.7;99.3 |

## 3.5 Study Population

### 3.5.1 Health Care Facilities

Health care facilities are divided in higher/ medium-level facilities (1-Hospitals, 2-Emergency care/Other) and lower-level facilities (3-Basic health units (UBS), 4-Operational bases 5-Laboratories). For reporting purposes, laboratories will be grouped as Operational bases.

During the 1<sup>st</sup> phase, only higher/medium-level health facilities will be trained and will collect information; if recommended by the ISOC and approved by the sponsors, the 2<sup>nd</sup> phase will be initiated including lower-level health facilities and additional higher-level health facilities.

### 3.5.2 Patients

Patient selection is based on the inclusion and exclusion criteria listed below. Patients who meet each of the inclusion criteria and none of the exclusion criteria are eligible to participate in this study.

#### **Inclusion criteria:**

A patient must meet the following criterion to be eligible for the study:

- Diagnosed with mono-species *P. vivax* malaria (parasitologically confirmed through microscopy or rapid diagnostic test)
- Diagnosed with *P. vivax/P. falciparum* malaria mixed infection (parasitologically confirmed through microscopy or rapid diagnostic test) and older than 6 months of age
- Diagnosed negative for *P. vivax* mono-species malaria or *P. vivax/P. falciparum* malaria mixed infection but had a positive diagnosis in the past

#### **Exclusion criteria:**

None.

## 3.6 Endpoints

### 3.6.1 Primary Endpoints

The primary endpoint will be the percentage of *P. vivax* patients aged  $\geq 16$  years, excluding those who were treated for *P. vivax* malaria in the last 60 days, treated or not with TQ in accordance with the appropriate level of G6PD enzyme activity.

### 3.6.2 Secondary Endpoints

Secondary endpoints will be the following:

1. Percentage of *P. vivax* patients aged  $\geq 6$  months treated or not with daily PQ in accordance with the appropriate level of G6PD enzyme activity.
2. Description of the characteristics of patients (age, gender, ethnicity, weight, malaria history, malaria diagnosis, hemoglobin, pregnancies, G6PD activity) treated with TQ or with PQ.
3. Frequency of confirmed drug-induced AHA and hospitalization due to drug-induced AHA.

## 4 STUDY VARIABLES

The frequency and timing of the observations or assessment for this study can be found in the schedule of assessments in Appendix 1.

Information is collected from SIVEP form unless otherwise specified. The variables analyzed as part of the study are described in the following sections.

### 4.1 Demographics and Baseline Characteristics

Demographics collected from SIVEP form include age (years), sex (Female/Male), ethnicity (White, Black, Yellow, Mixed, Indigenous), education (illiterate, 1<sup>st</sup> to 5<sup>th</sup> year, 5<sup>th</sup> year, 6<sup>th</sup> to 9<sup>th</sup> year, completed basic education, incomplete high school, complete high school, incomplete college, complete college, not applicable) and occupation in last 15 days (agriculture, livestock, household, tourism, gold digging, farming, hunting/fishing, construction, mining, traveller, others).

Other following baseline characteristics collected from SIVEP form include:

- Patient consent for secondary use of their data (yes)
- Weight in kilograms (continuous)
- Pregnancy status (1<sup>st</sup> trimester, 2<sup>nd</sup> trimester, 3<sup>rd</sup> trimester, Unsure, No, Not applicable)
- Breastfeeding (yes/no) and breastfeeding duration (days)
- Malaria history: treated for *P. vivax* in the last 60 days (Yes/No), treated for *P. falciparum* in the last 40 days (Yes/No)
- Malaria diagnosis:
  - Date of first symptoms (dd/mm/yyyy)
  - Diagnostic test (date (dd/mm/yyyy); type of test: (blood slide, RDT, PCR)
  - Parasitemia: parasites per mm<sup>3</sup>, parasitemia in crosses (<half cross, half cross, one cross, 2 crosses, 3 crosses, 4 crosses)

### 4.2 G6PD Enzyme Activity

- Hemoglobin level (g/dL)
- G6PD enzyme activity (U/g Hb)
  - Deficient (G6PD  $\leq$ 4.0 U/g Hb)
  - Intermediate (4.1 to 6.0 U/g Hb)
  - Normal ( $\geq$ 6.1 U/g Hb)
- Source of information
  - Test
  - Patient card

### 4.3 Malaria Treatments

The malaria treatment information collected from SIVEP form includes:

- Anti-malarial drugs administered and treatment duration
  - Blood stage treatment: CQ 3 days, AL, ASMQ, Injectable AS, Weekly CQ, CQ 3-day + weekly CQ, Other with specification, No treatment reported.
  - Liver stage /gametocyte: None, PQ 7-days, PQ 14-days, PQ single dose, PQ weekly, TQ, Other with specification (dd/mm/yyyy). For reporting purposes, PQ single dose is categorized as “none” as the dose is inappropriate for *P. vivax* radical cure.
- Start date

## 4.4 Clinic Characteristics

The clinic characteristics collected from SIVEP form include:

- Municipality (name and code)
- Health facility (name and code)
- HCP (code)

## 4.5 Safety Assessments

Safety assessments at Day 5 (follow-up visit) include signs of hemolysis following treatment initiation (jaundice, dark urine, other) collected from the SIVEP Form.

SIVEP records are linked with hospital records at the referral hospitals and with the state hospital database to identify hospitalization after malaria episodes as a starting point to identify potential cases of AHA. Each positive crosslink will be further investigated for signs of AHA. A report with true pairs generated from the probabilistic linkage will be issued to the head of the local malaria surveillance department for investigation.

In addition, SIVEP records are linked with the mortality information system to identify deaths among positive and negative notifications and understand causality.

NB: Only patients who have consented to data sharing are linked and investigated.

In case of confirmed AHAs (irrespective of the relationship with primaquine or tafenoquine) detected through this process at the two referral hospitals and in other hospitals in the municipalities, the following additional data will be collected from patient medical records from the hospitals, and will be linked with the data collected in the SIVEP form:

- Time to onset since start *P. vivax* treatment (TQ/PQ)
- Hemoglobin level
- Laboratory results
- AHA signs and symptoms
- AHA treatment (blood transfusion, dialysis, other)
- Hospitalization (hospitalization date, discharge date)
- Hospitalization outcomes (ongoing, complete recovery, improved with disability, death)
- Diagnosis (primary and secondary)

In case of death;

- Treatment given (TQ/PQ)
- Time since start of *P. vivax* treatment (TQ/PQ)
- G6PD status.

Information about AHA cases and deaths are provided in detailed reports.

Although the protocol included the linkage of HCP training records with cases of AHA, there is no value in doing so as the SIVEP form is not necessarily filled out by the person who performs the G6PD test / selects the treatment.

## 5 STATISTICAL METHODOLOGY

### 5.1 General Considerations

#### 5.1.1 Statistical Rules and Data Formats

Quantitative (continuous) variables will be described by the number of observations, mean, standard deviation (SD), median, first and third quartiles (Q1-Q3), extreme values (minimum and maximum).

Qualitative (categorical) variables will be described by the absolute ( $n$ ) and relative (%) frequency of each response category. For categorical variables with at least one missing observation, a category of 'missing' will be added to document the number of missing observations. The percentages of missing observations will be applicable for the categorical variables, summarized by relative (%) frequency, based on the total number of patients (i.e., assessed and missing). If there is no missing observation, a category of 'missing' may not be added. In tables describing G6PD activity distributions, the number missing will not be included in the denominator for the percentage calculation.

Means, medians, and quartiles will be rounded to one decimal more than that with which the original data are recorded. The standard deviation will be rounded to two decimals more than the original data. Minimum and maximum values will be reported with the same number of decimals with which the original data are recorded.

Percentages will be rounded to one decimal place.

Confidence intervals for means and percentages will be derived when appropriate using Clopper-Pearson method (for percentage) and will be two-sided at the 95% level unless otherwise specified.

Figures will also be provided when appropriate.

Analysis will be purely descriptive.

#### 5.1.2 Missing Data

No imputation of missing data will be done.

#### 5.1.3 Outliers

No adjustment for outliers will be done.

#### 5.1.4 Analysis Time Points

For analysis, the baseline will be defined as the date of treatment initiation specified in the SIVEP form. The number of days from the baseline will be used to define other analysis time points.

A follow-up visit is planned at Day 5 starting from baseline.

Another follow-up can be completed from the referral hospital and the date of admission to the hospital will be used to compute the number of days from the baseline.

### 5.1.5 Statistical Software

The analysis will be performed under SAS® software version 9.4 or later.

### 5.1.6 Statistical Output

An analysis dataset will be created from the raw electronic data capture (EDC) data set, delivered in CSV format, to facilitate programming of Tables, Figures, and Listings (TFL).

Proposed shells for TFL will be provided as listed in the planned output (See Appendix 2).

TFL output will be provided in PDF format.

## 5.2 Analysis Sets

Analysis population: Populations will be defined by malaria species: mono-vivax infections (new cases or new infection within 60 days) and mixed *P. falciparum* / *P. vivax* infections). All patients who have met the selection criteria will be considered in the Analysis Population. NB: On review of the data from the second interim analysis, and before the database lock for the final analysis, it was decided to run separate analysis on patients with new infections within 60 days as they are not included in the primary endpoint. Analysis of mixed infection cases was planned in SAP V1.2 for the analysis of the phase 2 of the study, however, was not done.

Safety population: All patients having received at least 1 dose of TQ or more than 1 dose of PQ will be considered in the Safety Population.

## 5.3 Subgroups Analyses

After finalization of the protocol a subgroup of type of infection was deemed to be of interest. This will investigate differences between vivax mono infection and mixed infection.

### **Vivax mono infection:**

#### **Primary population: New cases**

Select analyses will be performed for all new vivax cases by anti-malarial treatment (Patients treated with TQ, Patients treated with PQ, Patients treated with 7-day PQ, Patients treated with 14-day PQ, Patients treated with weekly PQ, Patients not treated with TQ/PQ).

In addition, the following subgroups will be considered for analysis as applicable:

- Facility level and type: patients from higher/medium-level facilities (1-Hospitals, 2-Emergency care / Other) and patients from lower-level facilities (3-Basic health units (UBS), 4-Operational bases). For reporting purposes laboratories will be grouped as Operational bases
- Age classes ( $\geq 6$  months to  $< 5$  years;  $\geq 5$  to  $< 16$  years;  $\geq 16$  to  $< 30$  years;  $\geq 30$  to  $< 50$  years;  $\geq 50$  to  $< 70$  years;  $\geq 70$  years)
- Sex (Male; Female)
- Ethnic groups (White; Black; Yellow; Mixed; Indigenous)
- G6PD activity (Deficient:  $\leq 4.0$  U/g Hb; Intermediate: 4.1-6.0 U/g Hb; Normal:  $\geq 6.1$  U/g Hb)



- Weight (kilograms) will be operationalized in two ways:
  - $\geq 5$  to  $<10$ ,  $\geq 10$  to  $<25$ ,  $\geq 25$  to  $<35$ ,  $\geq 35$  to  $<50$ ,  $\geq 50$  to  $<60$ ,  $\geq 60$  to  $<70$ ,  $\geq 70$  to  $<80$ ,  $\geq 80$  to  $<90$ ,  $\geq 90$  to  $<120$ , and  $\geq 120$
  - $\geq 5$  to  $<50$ ,  $\geq 50$  to  $<70$ ,  $\geq 70$  to  $<90$ ,  $\geq 90$  to  $<120$ , and  $\geq 120$

Additional subgroups of interest (to be defined prospectively) may also be examined, as deemed appropriate.

In addition, some analyses performed by anti-malarial treatment and/or facility level/type, will also be performed in patients from the municipality of Manaus and in patients from Porto Velho.

### **Patients with positive mono vivax infection within 60 days**

As mentioned under 5.2. this subgroup has been added for the final SAP / analysis.

Patients returning with a positive mono vivax infection within 60 days of the initial infection will be analysed separately by anti-malarial treatment (Patients treated with TQ, Patients treated with PQ, Patients treated with 7-day PQ, Patients treated with 14-day PQ, Patients treated with weekly PQ, Patients not treated with TQ/PQ).

In addition, the following subgroups will be considered for analysis as applicable:

- Anti-malarial treatment for first infection (TQ, 7-day PQ, 14-day PQ, weekly PQ, Not treated with TQ/PQ)
- Facility level and type: patients from higher/medium-level facilities (1-Hospitals, 2-Emergency care / other) and patients from lower-level facilities (3-Basic health units (UBS), 4-Operational base). For reporting purposes laboratories will be grouped as Operational bases.
- Age classes ( $\geq 6$  months to  $\leq 5$  years;  $>5$  to  $<16$  years;  $\geq 16$  to  $\leq 30$  years;  $>30$  to  $\leq 50$  years;  $>50$  to  $\leq 70$  years;  $>70$  years)
- Sex (Male; Female)
- Ethnic groups (White, Black, Yellow, Mixed, and Indigenous)
- G6PD activity (deficient:  $\leq 4.0$  U/g Hb, intermediate: 4.1-6.0 U/g Hb, normal:  $\geq 6.1$  U/g Hb)
- Weight (kilograms)  $\geq 5$  to  $<50$ ,  $\geq 50$  to  $<70$ ,  $\geq 70$  to  $<90$ ,  $\geq 90$  to  $<120$ , and  $\geq 120$

### **Mixed infections**

All analyses will be performed for all mixed *Pf/Pv* infection cases by anti-malarial treatment (Patients treated with TQ, Patients treated with PQ, Patients treated with 7-day PQ, Patients treated with 14-day PQ, Patients treated with weekly PQ, Patients not treated with TQ/PQ).

In addition, the following subgroups will be considered for analysis as applicable:

- Facility level and type: patients from higher/medium-level facilities (1-Hospitals, 2-Emergency care / Other) and patients from lower-level facilities (3-Basic health units (UBS), 4-Operational bases). For reporting purposes laboratories will be grouped as Operational bases.

- Age classes ( $\geq 6$  months to  $< 5$  years;  $\geq 5$  to  $< 16$  years;  $\geq 16$  to  $< 30$  years;  $\geq 30$  to  $< 50$  years;  $\geq 50$  to  $< 70$  years;  $\geq 70$  years)
- Sex (Male; Female)
- Ethnic groups (White, Black, Yellow, Mixed, and Indigenous)
- G6PD activity (deficient:  $\leq 4.0$  U/g Hb, intermediate: 4.1-6.0 U/g Hb, normal:  $\geq 6.1$  U/g Hb)
- Weight (kilograms)  $\geq 5$  to  $< 50$ ,  $\geq 50$  to  $< 70$ ,  $\geq 70$  to  $< 90$ ,  $\geq 90$  to  $< 120$ , and  $\geq 120$

## 5.4 Interim Analyses

A first interim analysis will be conducted after data from 600 *P. vivax* patients  $\geq 16$  years who have not been treated for *P. vivax* malaria in the last 60 days are collected in higher-level health facilities (all patient data collected from higher-level health facilities at the data cut-off will be analyzed).

An additional interim analysis will be conducted after data from 600 *P. vivax* patients  $\geq 16$  years who have not been treated for *P. vivax* malaria in the last 60 days are collected in lower-level facilities (all patient data collected from higher- and lower-level health facilities at the data cut-off will be analyzed).

## 5.5 Multicenter Study

During the 1<sup>st</sup> phase, the study was finally conducted in 9 higher-level health facilities and not 10 as initially planned. During the 2<sup>nd</sup> phase, the study was conducted in approximately 40 lower-level health facilities and not 100 as initially planned. No new higher-level health facility were involved while it was planned to conduct the study in 10 additional sites. The number of health facilities was lower than originally envisaged, due to the impact of Covid-19 on the organization of health services.

Taking into account the two phases, the study has been conducted in approximately 50 sites in Brazil instead of 120 as initially planned.

## 5.6 Analysis Plan

All analyses will be performed overall and by anti-malarial treatment. Other subgroups analysis as defined in Section 5.3 will be performed for primary and secondary endpoints.

The percentages will be calculated based on the respective analysis set or the number of non-missing observations (i.e., the number of patients assessed) in the respective analysis unless otherwise specified in the sections below.

Descriptive continuous and categorical variables will be summarized as defined in Section 5.1.1.

### 5.6.1 Patient Disposition

Patient disposition will be summarized overall for each subgroup and by anti-malarial treatment for each municipality using descriptive statistics (see Section 5.1.1) for the following parameters: number of patients included in the study database, number and percentage of patients included in the Analysis Population and reason for exclusion and

number and percentage of patients included in the Safety Population and reason of exclusion, number and percentage of patients included from higher/medium- and lower-level of facilities and number and percentage of patients returning for Day 5 follow-up.

### 5.6.2 Demographics and Baseline Characteristics

Socio-demographics and baseline characteristics will be summarized using descriptive statistics (see Section 5.1.1) for the overall analysis population of each sub-group and by anti-malarial treatment, by anti-malarial treatment for each municipality, by facility level and type, and by sex (definition of subgroups in Section 5.3).

- Socio-demographic characteristics, in line with the SIVEP form, will be summarized for the following parameters: age (years), age in class (6 months to  $\leq 5$  years;  $>5$  to  $<16$  years;  $\geq 16$  to  $<30$  years;  $\geq 30$  to  $<50$  years;  $\geq 50$  to  $<70$  years;  $\geq 70$  years), sex (Male, Female), ethnic group (White, Black, Yellow, Mixed, Indigenous), education ((illiterate, 1st to 5th year, 5th year, 6th to 9th year, Complete basic education, Incomplete high school, Complete high school, Incomplete college, Complete college, Not applicable), weight (kilograms) as a continuous variable and in class ( $\geq 5$  to  $<10$ ,  $\geq 10$  to  $<25$ ,  $\geq 25$  to  $<35$ ,  $\geq 35$  to  $<50$ ,  $\geq 50$  to  $<60$ ,  $\geq 60$  to  $<70$ ,  $\geq 70$  to  $<80$ ,  $\geq 80$  to  $<90$ ,  $\geq 90$  to  $<120$ , and  $\geq 120$ );  $\geq 5$  to  $<50$ ,  $\geq 50$  to  $<70$ ,  $\geq 70$  to  $<90$ ,  $\geq 90$  to  $<120$ , and  $\geq 120$ ) and for female patients of childbearing potential (16 to  $<50$  years), pregnancy (Yes/No/missing), pregnancy status (1st trimester, 2nd trimester, 3rd trimester, Unsure, No, Not applicable), breastfeeding (Yes/No/missing) and breastfeeding duration.

The following baseline characteristics related to the disease will also be summarized:

- Malaria history: treated for *P. vivax* in the last 60 days (Yes/No); treated for *P. falciparum* in the last 40 days (Yes/No); Blood transfusion in the last 60 days (Yes/No)
- Malaria diagnosis: time since first symptoms (days), time since diagnostic test (days), type of test (blood slide, RDT, PCR), parasites per  $\text{mm}^3$ , parasitemia in class ( $<$ half cross, half cross, one cross, 2 crosses, 3 crosses, 4 crosses)

### 5.6.3 G6PD Test and Hemoglobin Level

The following analyses will be produced using descriptive statistics (see Section 5.1.1) for the overall analysis population and by the subgroups defined in Section 5.3: anti-malarial treatment for each municipality, facility level and type for each municipality, sex, and ethnic groups.

The number and percentage of *P. vivax* patients tested for G6PD deficiency will be summarized as well as the distribution of G6PD test result, source of information (G6PD test; G6PD card), G6PD activity in class ( $\leq 4.0$  U/g Hb; 4.1-6.0 U/g Hb;  $\geq 6.1$  U/g Hb) and in percentage in overall patients (excluding those with missing G6PD activity), patients <16 years and patients  $\geq 16$  years, pregnant women and hemoglobin levels (g/dL) (mean, median, Q1:Q3; min; max; <7 g/dL (n and %)).

Among the *P. vivax* patients treated with TQ, the number and percentage of patients with  $\geq 70\%$  G6PD activity, with <70% G6PD activity and with no G6PD test will be described in overall patients, patients <16 years and patients  $\geq 16$  years.

Among the *P. vivax* patients treated with PQ, the number and percentage of patients with  $\geq 30\%$  G6PD activity, with <30% G6PD activity and with no G6PD test will be described.

G6PD activity by sex (male/female) and by G6PD category (deficient, intermediate, normal) will be summarized graphically (vertical bar charts and box charts; excluding those with missing G6PD activity and including those females who are pregnant). Mean hemoglobin levels by sex (male/female) will be summarized graphically (box charts, excluding those with missing Hb).

Addition to the final SAP / TFLs: Listing of G6PD activity in patients with Hb <7 g/dL and antimalarial treatment will be produced.

The source of information for G6PD activity will also be analyzed.

### 5.6.4 Multiple *P. vivax* Episodes

The number and percentage of patients returning with new episode of *P. vivax* before or at Day 29 (recrudescence), and after Day 29 (recurrence/relapse), the number and the distribution of recurrences will be summarized using descriptive statistics as described Section 5.1.1 for the overall analysis population and in the subgroups of interest: anti-malaria treatment (and for each municipality), sex, and weight categories (defined in Section 5.3).

The number of symptomatic *P. vivax* recurrences will also be presented graphically (histogram) by anti-malarial treatment.

The variability in G6PD status and hemoglobin level in same patient over multiple *P. vivax* episodes (assumes same unique patient identifier in database) will be summarized:

- % change for each G6PD category status (Normal, Intermediate, Deficient) in same female patients and in male patients who were retested
- % change will also be summarized as a shift table between categories at baseline and categories at the time of recurrence

### 5.6.5 Malaria Treatments

Anti-malarial drugs administered for blood stage and liver stage as listed in Section 4.3 will be presented using descriptive summary statistics for the overall analysis population

and by anti-malarial treatment for each municipality, and by facility level and type for each municipality (see definition in Section 5.3): the number and percentage of patients with each treatment administered and intended treatment will be also summarized in patients from Manaus and Porto Velho.

### 5.6.6 Primary Analysis: Appropriate Use of TQ

The following analyses will be performed for the analysis population and in the subgroups of interest defined in Section 5.3: facility level and type for each municipality and overall, and sex (except for analysis with facility as denominator).

The number and percentage of patients aged  $\geq 16$  years who were not treated for *P. vivax* in the last 60 days will be summarized using descriptive statistics by treated or not with TQ in accordance with the appropriate level of G6PD enzyme activity.

The primary endpoint will be calculated as follows:

Among patients aged  $\geq 16$  years excluding patients who were treated for *P. vivax* malaria in the last 60 days:

$$\frac{\text{Appropriate use of TQ}^* + \text{Appropriate non-use of TQ}^{**}}{\text{Total use of TQ}^{***} + \text{Appropriate non-use of TQ}^{**}}$$

\* Number of patients with  $\geq 70\%$  G6PD activity treated with TQ

\*\* Number of patients with  $< 70\%$  G6PD activity + patients with missing G6PD activity not treated with TQ

\*\*\* Number of patients treated with TQ

In addition, the percentage of *P. vivax* patients receiving TQ based on correct application of treatment algorithm (G6PD activity, age, non-breastfeeding, and non-pregnant) will be presented using descriptive summary statistics.

#### Definitions based on the treatment algorithm:

Appropriate use of TQ is defined as G6PD activity  $\geq 70\%$  ( $\geq 6.1$  U/g Hb), age  $\geq 16$  years, non-breastfeeding (or missing breastfeeding status female  $< 16$  years old or  $\geq 50$  years old), and non-pregnant (or not applicable) treated with TQ.

Inappropriate use of TQ is defined as G6PD activity  $< 70\%$  ( $\leq 6.0$  U/g Hb) or missing G6PD activity, or age  $< 16$  years, breastfeeding (or missing breastfeeding status female  $\geq 16$  years -  $< 50$  years old), or pregnant (or missing pregnant status in females  $\geq 16$  years -  $< 50$  years old) treated with TQ.

Inappropriate non-use of TQ is defined as G6PD activity  $\geq 70\%$  ( $\geq 6.1$  U/g Hb), age  $\geq 16$  years, non-breastfeeding (or missing breastfeeding status female  $\geq 50$  years old), and non-pregnant (or not applicable) and NOT treated with TQ.

Appropriate non-use of TQ is defined as G6PD activity  $< 70\%$  ( $\leq 6.0$  U/g Hb) or missing G6PD activity or age  $< 16$  years, or breastfeeding (or missing breastfeeding status female  $\geq 16$  years -  $< 50$  years old), or pregnant (or missing pregnant status in females  $\geq 16$  years -  $< 50$  years old) and NOT treated with TQ.

A listing of patients receiving inappropriate TQ treatment, grouped by category of inappropriate use, will be produced.

The percentage of *P. vivax* patients receiving TQ based on correct G6PD activity, age, non-breastfeeding, non-pregnant, and receiving CQ blood stage treatment will be calculated separately for the patients of each facility level and type.

NB: Denominators for calculating percentages will vary as follows:

- G6PD activity: Will include missing G6PD activity
- Women of childbearing age defined in this study as  $\geq 16$  years -  $< 50$  years old will serve as the denominator for breastfeeding and pregnant women

The percentage of facilities providing TQ based on correct G6PD activity, age, non-breastfeeding, non-pregnant, and CQ blood stage treatment will be calculated for each facility level and type using the following categories:  $< 50\%$ ,  $50\%$  to  $< 75\%$ ,  $75\%$  to  $< 90\%$ ,  $90\%$  -  $< 100\%$  and  $100\%$  of patients.

## 5.6.7 Secondary Analyses

### 5.6.7.1 Secondary Endpoint 1: Appropriate Use of PQ

The following analyses will be performed for the analysis population and in the subgroups of interest defined in Section 5.3: facility level and type for each municipality and overall, and sex (except for analysis at facility level).

- The number and percentage of *P. vivax* patients aged  $\geq 6$  months treated or not with daily PQ in accordance with the appropriate level of G6PD enzyme activity ( $\geq 30\%$ ) will be summarized using descriptive statistics for the analysis population and by facility level and type, and by sex (subgroups defined in Section 5.3). Daily PQ is defined as receiving either the 7-day or 14-day treatment regimen of PQ.

Among patients aged  $\geq 6$  months:

$$\frac{\text{Appropriate use of daily PQ}^* + \text{Appropriate non-use of daily PQ}^{**}}{\text{Total use of PQ}^{***} + \text{Appropriate non-use of daily PQ}^{**}}$$

\* Number of patients with  $\geq 30\%$  G6PD activity treated with daily PQ

\*\* Number of patients with  $< 30\%$  G6PD activity + with missing G6PD activity not treated with daily PQ

\*\*\* Number of patients treated with daily PQ

In addition, the percentage of *P. vivax* patients receiving daily PQ based on correct application of treatment algorithm (G6PD activity, age, breastfeeding from the second month of lactation, non-pregnant).

The correct application of treatment algorithm is defined as:

1. Correct application of daily PQ: Defined by G6PD activity  $\geq 30\%$  ( $\geq 4.1$  U/g Hb), age  $\geq 6$  months, non-breastfeeding/breastfeeding from  $\geq 30$  days of lactation (or missing breastfeeding status female  $< 16$  years old or  $\geq 50$  years old), and non-pregnant (or not applicable).
2. Patients receiving 7-day PQ: Defined by G6PD activity  $\geq 30\%$  ( $\geq 4.1$  U/g Hb), age  $\geq 6$  months, non-breastfeeding/breastfeeding from  $\geq 30$  days of lactation (or missing breastfeeding status female  $< 16$  years old or  $\geq 50$  years old), and non-pregnant (or not applicable) **and not treated for *P. vivax* malaria in the last 60 days.**
3. Patients receiving 14-day PQ: Defined by G6PD activity  $\geq 30\%$  ( $\geq 4.1$  U/g Hb), age  $\geq 6$  months, non-breastfeeding/breastfeeding from  $\geq 30$  days of lactation (or missing breastfeeding status female  $< 16$  years old or  $\geq 50$  years old), and non-pregnant (or not applicable) **and treated for *P. vivax* malaria in the last 60 days.**

4. Patients receiving weekly PQ: Defined by **G6PD activity <30% ( $\leq 4.0$  U/g Hb)** or missing G6PD activity, age  $\geq 6$  months, non-breastfeeding/breastfeeding from  $\geq 30$  days of lactation (or missing breastfeeding status female  $< 16$  years old or  $\geq 50$  years old), and non-pregnant (or not applicable).
5. Correct application of PQ (daily and weekly): Defined by 1 and 4 above.

A listing of patients receiving inappropriate PQ treatment will be produced grouped by category of inappropriate use.

The percentage of *P. vivax* patients receiving daily PQ based on correct application of treatment algorithm (G6PD activity, age, breastfeeding from  $\geq 30$  days of lactation, non-pregnant) will be calculated for each facility level and type.

The percentage of facilities providing daily PQ based on correct G6PD activity, age, non-breastfeeding for  $< 30$  days, non-pregnant will be calculated for each facility level and type using the following categories:  $< 50\%$ ,  $50\%$  to  $< 75\%$ ,  $75\%$  to  $< 90\%$ ,  $90\%$  -  $< 100\%$  and  $100\%$  of patients.

### 5.6.7.2 Secondary Endpoint 2: Patient Characteristics

Patient baseline characteristics and G6PD activity of patients treated with TQ and of patients treated with PQ will be presented using descriptive statistics for the analysis population and in the subgroups defined in Section 5.3.

Refer to analysis description provided in the Sections 5.6.2 Demographics and Baseline Characteristics and 5.6.3 G6PD Test.

### 5.6.7.3 Secondary Endpoint 3: Confirmed AHA (whatever is the relationship with the investigational drugs)

Suspected AHA will be presented using descriptive summary statistics as described in Section 5.1.1 for the overall safety population and in the subgroups: anti-malarial treatment (for each municipality and overall), facility level and type (for each municipality and overall), age classes, sex, and G6PD activity (defined in Section 5.3).

The following parameters will be summarized based information collected on the Day 5 visit:

- Number and percentage of patients who had one symptom of AHA (dark urine / yellow eyes),
- Time since start of *P. vivax* treatment (PQ/TQ)
- Number of AHA in total and per patient,
- Hemoglobin level, summary of other laboratory results, and change from baseline as available,
- AHA signs and symptoms,
- AHA treatments,
- Hospitalizations related to episode of AHA, duration of hospitalizations, and outcomes

In addition, the percentage of patients followed-up at Day 5 will be provided as well as the percentage of patients with AHA signs and details of signs summarized in the safety population and by anti-malarial treatment.

A listing of reported/confirmed cases of AHA will be produced.

Case narratives for cases of confirmed AHA will be included in the study report.

### **5.6.8 Other Safety Analyses**

A listing of pregnant female patients will be produced.



### 5.6.9 Malaria Follow-up at Day 5

Malaria follow-up at Day 5 will be presented using descriptive summary statistics as described in Section 5.1.1 for the overall analysis population and by anti-malarial treatment subgroups (defined in Section 5.3).

The percentage of patients with a follow-up visit on Day 5 will be summarized.

## 6 QUALITY AND VERSION CONTROL

All output will be validated and quality-controlled according to ICON standard operating procedures.

The initial approved version of the SAP will be noted as Version 1.0. Any changes to the SAP will be documented in a new version and the version number updated.

## 7 REFERENCES

1. Rajapakse S, Rodrigo C, Fernando SD. Tafenoquine for preventing relapse in people with Plasmodium vivax malaria. The Cochrane database of systematic reviews. 2015(4):Cd010458.
2. Ebstie YA, Abay SM, Tadesse WT, Ejigu DA. Tafenoquine and its potential in the treatment and relapse prevention of Plasmodium vivax malaria: the evidence to date. Drug design, development and therapy. 2016;10:2387-99.

## Appendix 1: Schedule of Assessments

| Assessments                                                             | Enrolment Visit | Follow-up Day 5 <sup>a</sup> / any time after enrollment visit <sup>b</sup> |
|-------------------------------------------------------------------------|-----------------|-----------------------------------------------------------------------------|
| Informed consent for data use <sup>b</sup>                              | X <sup>a</sup>  |                                                                             |
| Inclusion/exclusion criteria                                            | X <sup>a</sup>  |                                                                             |
| Clinic characteristics                                                  | X <sup>a</sup>  |                                                                             |
| Socio-demographics                                                      | X <sup>a</sup>  |                                                                             |
| Pregnancy status                                                        | X <sup>a</sup>  |                                                                             |
| Malaria history                                                         | X <sup>a</sup>  |                                                                             |
| Malaria diagnosis                                                       | X <sup>a</sup>  |                                                                             |
| Quantitative G6PD test                                                  | X <sup>a</sup>  |                                                                             |
| Hemoglobin level                                                        | X <sup>a</sup>  | X <sup>b</sup>                                                              |
| Malaria treatments                                                      | X <sup>a</sup>  |                                                                             |
| Safety information:<br>Signs of hemolysis (jaundice, dark urine, other) |                 | X <sup>ab</sup>                                                             |
| Safety information:<br>Acute hemolytic anemia <sup>c</sup>              |                 | X <sup>b</sup>                                                              |
|                                                                         |                 |                                                                             |

<sup>a</sup>Data collected from SIVEP form,

<sup>b</sup>Data collected from referral hospital,

<sup>ab</sup>Data collected from SIVEP form and/or from referral hospital

## Appendix 2: Planned Output

| Table Number  | Title                                                                                                                           |
|---------------|---------------------------------------------------------------------------------------------------------------------------------|
| Table 1.1.0   | Facility and patient characteristics by municipality                                                                            |
| Table 1.1.1   | Patient disposition by anti-malarial drug administered and overall (Summary)                                                    |
| Table 1.1.1.1 | Patient disposition by anti-malarial drug administered and overall – Patients from Manaus                                       |
| Table 1.1.1.2 | Patient disposition by anti-malarial drug administered and overall – Patients from Porto Velho                                  |
| Table 1.1.1.3 | Patient disposition by anti-malarial drug administered and overall - New Pv infection within 60 days                            |
| Table 1.1.1.4 | Patient disposition by anti-malarial drug administered and overall - Mixed Pf / Pv infections                                   |
| Table 1.1.2   | Patient disposition by anti-malarial drug administered and overall (primary population)                                         |
| Table 1.2.1   | Socio-demographic and baseline characteristics by anti-malarial drug administered and overall - Analysis population             |
| Table 1.2.2   | Socio-demographic and baseline characteristics by facility level and type and overall - Analysis population                     |
| Table 1.2.3   | Socio-demographic and baseline characteristics by sex and overall - Analysis population                                         |
| Table 1.2.4   | Socio-demographic and baseline characteristics by new Pv infections within 60 days - Analysis population                        |
| Table 1.2.5   | Socio-demographic and baseline characteristics by mixed Pf /Pv infections - Analysis population                                 |
| Table 1.3.1   | Malaria history and diagnosis by anti-malarial drug administered and overall - Analysis population                              |
| Table 1.3.1.1 | Malaria history and diagnosis by anti-malarial drug administered and overall - Analysis population, Patients from Manaus        |
| Table 1.3.1.2 | Malaria history and diagnosis by anti-malarial drug administered and overall - Analysis population, Patients from Porto Velho   |
| Table 1.3.2   | Malaria history and diagnosis by facility level and type and overall - Analysis population                                      |
| Table 1.3.3   | Malaria history and diagnosis by facility level and type and overall – New Pv infection within 60 days - Analysis population    |
| Table 1.3.4   | Malaria history and diagnosis by facility level and type and overall – Mixed Pf / Pv infection - Analysis population            |
| Table 1.4.1   | G6PD tests and hemoglobin level by anti-malarial drug administered and overall - Analysis population                            |
| Table 1.4.1.1 | G6PD tests and hemoglobin level by anti-malarial drug administered and overall - Analysis population, Patients from Manaus      |
| Table 1.4.1.2 | G6PD tests and hemoglobin level by anti-malarial drug administered and overall - Analysis population, Patients from Porto Velho |
| Table 1.4.2   | G6PD tests and hemoglobin level by facility level and type and overall - Analysis population                                    |
| Table 1.4.2.1 | G6PD tests and hemoglobin level by facility level and type and overall - Analysis population, Patients from Manaus              |
| Table 1.4.2.2 | G6PD tests and hemoglobin level by facility level and type and overall - Analysis population, Patients from Porto Velho         |

|               |                                                                                                                                        |
|---------------|----------------------------------------------------------------------------------------------------------------------------------------|
| Table 1.4.3   | G6PD tests and hemoglobin level by sex and overall - Analysis population                                                               |
| Table 1.4.4   | G6PD tests and hemoglobin level by ethnic group and overall - Analysis population                                                      |
| Table 1.4.5   | G6PD tests and hemoglobin level in pregnant women - Analysis population                                                                |
| Table 1.4.6   | G6PD tests and hemoglobin level by anti-malarial drug administered and overall – New Pv infection within 60 days - Analysis population |
| Table 1.4.7   | G6PD tests and hemoglobin level by anti-malarial drug administered and overall – Mixed Pf / Pv infection -Analysis population          |
| Table 1.5.1   | Multiple P. vivax episodes by anti-malarial drug administered and overall - Analysis population                                        |
| Table 1.5.2   | Multiple P. vivax episodes by sex and overall - Analysis population                                                                    |
| Table 1.5.3   | Multiple P. vivax episodes by weight category and overall - Analysis population                                                        |
| Table 1.5.4.1 | Change in G6PD category status in same patients – Recurring population                                                                 |
| Table 1.6.1   | Malaria treatments by anti-malarial drug administered and overall - Analysis population                                                |
| Table 1.6.1.1 | Malaria treatments by anti-malarial drug administered and overall - Analysis population, Patients from Manaus                          |
| Table 1.6.1.2 | Malaria treatments by anti-malarial drug administered and overall - Analysis population, Patients from Porto Velho                     |
| Table 1.6.2   | Malaria treatments by facility level and type and overall - Analysis population                                                        |
| Table 1.6.2.1 | Malaria treatments by facility level and type and overall - Analysis population, Patients from Manaus                                  |
| Table 1.6.2.2 | Malaria treatments by facility level and type and overall - Analysis population, Patients from Porto Velho                             |
| Table 1.6.3   | Malaria treatments by facility level and overall – New vivax infection within 60 days                                                  |
| Table 1.6.4   | Malaria treatments by facility level and overall – Mixed Pf / Pv infections                                                            |
| Table 2.1.1   | Appropriate use and non-use of TQ by facility level and type and overall - Analysis population                                         |
| Table 2.1.1.1 | Appropriate use and non-use of TQ by facility level and type and overall - Analysis population, Patients from Manaus                   |
| Table 2.1.1.2 | Appropriate use and non-use of TQ by facility level and type and overall - Analysis population, Patients from Porto Velho              |
| Table 2.1.1.a | Characteristics of patients treated with TQ, by facility level and type and overall – Analysis population                              |
| Table 2.1.3   | Appropriate use of TQ by facility level and type and overall (% facility level)- Analysis population                                   |
| Table 2.1.3.1 | Appropriate use of TQ by facility level and type and overall (% facility level) - Analysis population, Patients from Manaus            |
| Table 2.1.3.2 | Appropriate use of TQ by facility level and type and overall (% facility level) - Analysis population, Patients from Porto Velho       |
| Table 2.2.1   | Appropriate use and non-use of daily PQ by facility level and type and overall - Analysis population                                   |
| Table 2.2.1.1 | Characteristics of patients treated with PQ by facility level and type and overall - Analysis population, Patients from Manaus         |

|                       |                                                                                                                                                   |
|-----------------------|---------------------------------------------------------------------------------------------------------------------------------------------------|
| Table 2.2.1.2         | Characteristics of patients treated with PQ by facility level and type and overall - Analysis population, Patients from Porto Velho               |
| Table 2.2.1.a         | Characteristics of patients treated with TQ by facility level and type and overall – New vivax infection in 60 days – Analysis population         |
| Table 2.2.1.a         | Characteristics of patients treated with PQ (daily, weekly) by facility level and type and overall - Analysis population                          |
| Table 2.2.2           | Characteristics of patients treated with PQ by facility level and type and overall – New vivax infections in 60 days                              |
| Table 2.2.3           | Appropriate use of PQ by facility level and type and overall (% facility level) - Analysis population                                             |
| Table 2.2.3.1         | Appropriate use of PQ by facility level and overall (% facility level) - Analysis population, Patients from Manaus                                |
| Table 2.2.3.2         | Appropriate use of PQ by facility level and overall (% facility level) - Analysis population, Patients from Porto Velho                           |
| Table 2.2.3.3         | Appropriate use of PQ in new vivax infections by facility level and overall (% facility level) - Analysis population                              |
| Table 2.3.1           | Safety follow-up and signs of hemolysis by anti-malarial drug administered and overall – Safety population                                        |
| Table 2.3.1.1         | Safety follow-up and signs of hemolysis by anti-malarial drug administered and overall – Safety population, patients from Manaus                  |
| Table 2.3.1.2         | Safety follow-up and signs of hemolysis by anti-malarial drug administered and overall – Safety population, patients from Porto Velho             |
| Table 2.3.2           | Safety follow-up and signs of hemolysis by facility level and type and overall – Safety population                                                |
| <b>Figure Number</b>  | <b>Title</b>                                                                                                                                      |
| Figure 1.4.3.1        | G6PD activity by category and sex - Analysis population (bar chart and box chart)                                                                 |
| Figure 1.4.3.2        | Hemoglobin level by sex – Analysis population (box chart)                                                                                         |
| Figure 1.5.1          | Number of P. vivax recurrences by anti-malarial drug administered - Analysis population                                                           |
| <b>Listing Number</b> | <b>Title</b>                                                                                                                                      |
| Listing 1.2.1         | Demographic characteristics by municipality, treatment, and site / ID                                                                             |
| Listing 1.2.2         | G6PD activity in patients with low Hb (<7g /dL) and antimalarial treatment administered                                                           |
| Listing 1.5.1         | Patients with multiple recurrences                                                                                                                |
| Listing 2.1.1         | Patients receiving inappropriate TQ treatment by municipality / location                                                                          |
| Listing 2.1.2         | Patients receiving inappropriate TQ treatment – new vivax infection in 60 days - by municipality / location                                       |
| Listing 2.1.3         | Patients receiving inappropriate TQ treatment – mixed Pf/Pv infection - by municipality / location                                                |
| Listing 2.2.1         | Patients receiving inappropriate PQ treatment by municipality / location (sorted by Municipality, grouped by category of inappropriate treatment) |

|               |                                                                              |
|---------------|------------------------------------------------------------------------------|
| Listing 2.3.1 | Patients with signs of hemolysis at Day 5 by locality code and G6PD activity |
| Listing 2.3.2 | Pregnant female patients                                                     |

Tables provided for Interim Analysis

## Appendix 3: Revision History

| Version | Date       | Author       | Section | Main changes                                                                                                                                                                                                                                                                                                          |
|---------|------------|--------------|---------|-----------------------------------------------------------------------------------------------------------------------------------------------------------------------------------------------------------------------------------------------------------------------------------------------------------------------|
| V0.1    | 0AUG2020   | Julie Duncan | N/A     | N/A                                                                                                                                                                                                                                                                                                                   |
| V0.2    | 02OCT2020  | Julie Duncan | N/A     | Update according to sponsor comments (see MMV_TQ_SAP Brazil_v0.1 DRAFT - 28AUG2020 pg_kr_sd_JP_LT_AL pg_evc_cal pg)                                                                                                                                                                                                   |
| V0.3    | 20JAN2021  | Julie Duncan | N/A     | Update according to sponsor meeting held on 15DEC2020                                                                                                                                                                                                                                                                 |
| V0.4    | 25MAI2021  | Julie Duncan | N/A     | Update according to sponsor comments (see MMV_TQ_SAP Brazil_v0.3 DRAFT - 20JAN2021 26Feb2021 and MMV_TQ_TFL Shells Brazil_v0.3 DRAFT - 20JAN2021 26Feb2021)<br><br>Update of the section "Changes from Planned Analyses "<br><br>Several analyses performed in patients from Manaus and in patients from Porto Velho. |
| V0.5    | 27JULY2021 | Julie Duncan | N/A     | Update according to sponsor comments (see MMV_TQ_SAP Brazil_v0.4 DRAFT - 31MAY2021_mmv 2.docx and MMV_TQ_TFL Shells Brazil_v0.3 DRAFT 31MAY2021 mmv 1.docx)                                                                                                                                                           |
| V1.0    | 23AUGUST   | Julie Duncan | N/A     | Finalisation of document                                                                                                                                                                                                                                                                                              |



|      |                  |              |         |                                                                                                                                                         |
|------|------------------|--------------|---------|---------------------------------------------------------------------------------------------------------------------------------------------------------|
| V1.1 | 13 May 2022      | Julie Duncan | Various | Update to match protocol amendment, clarify appropriate use definitions and add subgroup for infection type                                             |
| V1.2 | 27 June 2022     | Julie Duncan | Various | Update subgroups, clarify definitions of correct application of treatment algorithm (TQ and PQ), remove description of HCPs who performed the G6PD test |
| V3.0 | 07 December 2022 | Sally Trufan | Various | Update for Final Clinical Study Report analyses. Please see detailed list below:                                                                        |

## Changes to SAP V1.2 to V3.0

P14: 4.3 Malaria treatments: Clarified that single dose PQ is categorized as “none” as the dose is inappropriate for Pv radical cure.

P14. 4.5. Safety assessments:

- Added information about the probabilistic linkage between SIVEP records and hospital records from the referral hospital and databases from other hospitals in the municipality.
- Added information about the probabilistic linkage between the SIVEP records and Mortality Information System.
- Clarified that all confirmed AHA are investigated, irrespective of the relationship with primaquine or tafenoquine.
- Added laboratory results and diagnosis (primary and secondary) to the information derived from the hospital investigation process.
- Added information reported in the case of death (treatment, time since treatment, G6PD status).
- Clarified that information about confirmed AHA cases and deaths are provided in detailed reports.
- Deleted the collection of HCP training records: Although the protocol included the linkage of HCP training records with cases of AHA, there is no value in doing so as the SIVEP form is not necessarily filled out by the person who performs the G6PD test / selects the treatment.

P16: 5.1.1.: Statistical rules and data formats

- Deleted the statement that percentages will be calculated based on the non-missing observations. This has been updated to include missing in the percentage calculation.

P17: 5.2 Analysis Sets

- Addition of a new sub-group for analysis: New infections within 60 days as they are not included in the primary endpoint.
- Clarification of safety population: All patients having received at least 1 dose of TQ or PQ will be considered in the safety population (original statement: All patients treated with TQ or PQ).

P.17 5.3 Subgroup analyses

- Clarification of Primary population (new cases)
- Revision of age classes:

- Addition of sub-group of patients with positive mono vivax infection within 60 days and details of analysis.
